# Supplementary material for: Cyclopropanation vs. single-carbon insertion of pyrrole-2,3-diones with sulfonium ylides: synthesis of functionalized 2-azabicyclo[3.1.0]hexanes and pyridine-2,3-diones
Source: Royal Society of Chemistry journal article supplement (doi:10.1039/d4qo02337d), 2025-01-01

# SUPPORTING INFORMATION

## **Cyclopropanation vs. single-carbon insertion of pyrrole-2,3-diones with sulfonium ylides: synthesis of functionalized 2-azabicyclo[3.1.0]hexanes and pyridine-2,3-diones**

Maria M. Muranova, Andrey R. Galeev, Andrey N. Maslivets and Maksim V. Dmitriev

|                                                                   |    |
|-------------------------------------------------------------------|----|
| General information .....                                         | 2  |
| Synthesis of starting materials .....                             | 2  |
| Synthesis of products 3, 4 and 6 .....                            | 6  |
| NMR monitoring of cyclopropanation and ring expansion .....       | 16 |
| Thermal analysis of cyclopropane 3aa.....                         | 17 |
| Conditions for cyclopropane 3aa ring-opening reaction.....        | 17 |
| Attempts for an asymmetric synthesis of the cyclopropane 3aa..... | 18 |
| Crystal structure determination.....                              | 20 |
| References.....                                                   | 22 |
| Copies of NMR spectra.....                                        | 23 |

## General information

$^1\text{H}$ ,  $^{13}\text{C}$  NMR spectra were recorded on a Bruker Avance III HD spectrometer (at 400, 101 MHz, respectively) at 40 °C (313K) in  $\text{CDCl}_3$  and  $\text{DMSO-}d_6$  using the residual solvent peak ( $\text{CDCl}_3$ :  $\delta\text{H} = 7.26$  ppm,  $\delta\text{C} = 77.16$  ppm;  $\text{DMSO-}d_6$ :  $\delta\text{H} = 2.50$  ppm;  $\delta\text{C} = 39.52$  ppm) as internal standards. Splitting patterns of apparent multiplets were designated as s (singlet), d (doublet), t (triplet), q (quartet), m (multiplet), br (broadened). FT-IR spectra were recorded on a Perkin-Elmer Spectrum Two spectrometer from mulls in mineral oil. Melting points were measured with Mettler Toledo MP70 Melting Point apparatus. Thin-layer chromatography (TLC) was performed on silica gel 60 F254 plates (Merck); spots were visualized with UV light (254 nm / 365 nm) or iodine vapors. Flash column chromatography was performed on silica gel (Acros Organics, 35–70  $\mu\text{m}$ ). HPLC analyses were performed on Hitachi Chromaster equipped with PDA detector Hitachi Chromaster 5430 (NUCLEODUR C18 Gravity column 3  $\mu\text{m}$ , 4  $\times$  150 mm). The ee value was determined by HPLC on an Agilent 1260 instrument equipped with a diode array detector (254 nm); analysis conditions: Daicel CHIRALPAK IA-U column (100  $\times$  3 mm, 1.6  $\mu\text{m}$ ); mobile phase: hexane: isopropyl alcohol 50:50; flow rate 0.2 mL/min. HRMS were recorded on Bruker MicroTOF (ESI+). Elemental analyses were carried out on a Vario MICRO Cube analyzer. Thermal analysis was performed on NETZSCH Jupiter STA 449 F1. X-ray structural analyses were performed on an Xcalibur Ruby diffractometer using a Mo X-ray source (MoK $\alpha$  0.71073 Å), by scanning at 295(2) K. All solvents and reagents were purchased from commercial vendors and were used as received. Solvent drying was performed by standard methods. MeCN was stored over 4Å molecular sieves.

## Synthesis of starting materials

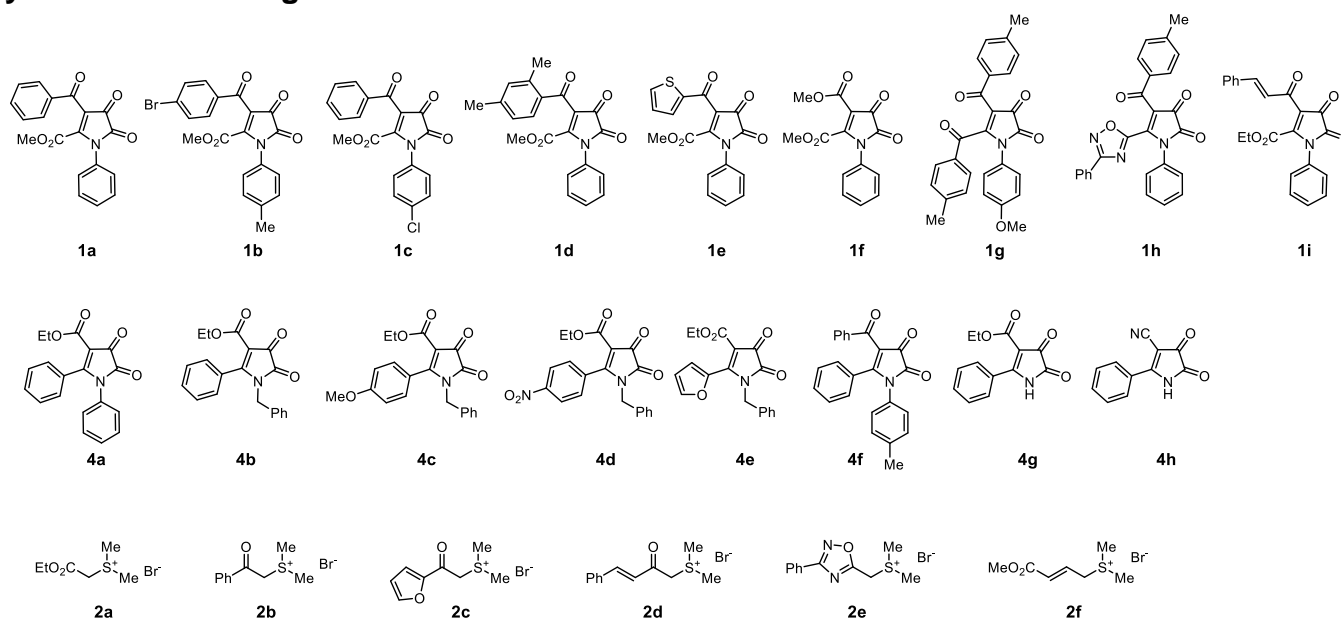

**Figure S1.** Numbering the pyrrole-2,3-diones **1**, **4** and sulfonium salts **2** used in the present study

**General procedure SM1 (synthesis of pyrrole-2,3-diones 1):** oxalyl chloride (0.94 mL, 11 mmol) is added dropwise to corresponding enamine (10 mmol) in dry  $\text{CHCl}_3$  (10 mL) and the mixture is refluxed for 1–2 h (**Scheme S1**). Warm hexanes (10 mL) are added to the reaction mixture. The formed crystalline product is filtered and washed with hexanes to give **1a–e**, **1h** [1,2], **1f** [3], **1g** [4], **1i** [5] as an orange-red powder.

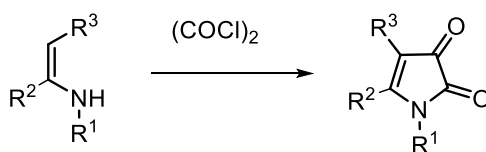

**Scheme S1.** Synthesis of pyrrole-2,3-diones **1** and **4**

**General procedure SM2 (synthesis of pyrrole-2,3-diones 4):** a solution of oxalyl chloride (1.02 mL, 12 mmol) in dry Et<sub>2</sub>O (10 mL) is added dropwise to the corresponding enamine (10 mmol) in dry Et<sub>2</sub>O (30 mL) and the mixture is stirred at RT for 2-24 h (**Scheme S1**). The formed crystalline product is filtered and washed with hexanes to give **4a–e**, **4g** [6], **4f** [7], **4h** [8] as an orange-yellow powder.

Spectral data for pyrrole-2,3-diones **1** and **4**

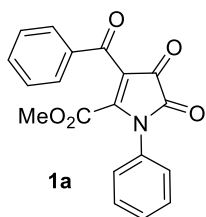

**<sup>1</sup>H NMR** (400 MHz, CDCl<sub>3</sub>) δ 7.91 – 7.76 (m, 2H), 7.63 (t, *J* = 7.4 Hz, 1H), 7.55 – 7.43 (m, 5H), 7.40 – 7.28 (m, 2H), 3.76 (s, 3H). **<sup>13</sup>C NMR** (101 MHz, CDCl<sub>3</sub>) δ 185.6, 177.8, 166.5, 160.3, 155.4, 136.5, 134.0, 132.5, 130.0 (2C), 129.9, 129.8 (2C), 128.6 (2C), 126.2 (2C), 111.5, 53.9.

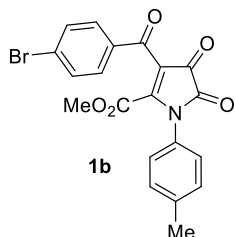

**<sup>1</sup>H NMR** (400 MHz, CDCl<sub>3</sub>) δ 7.72 (d, *J* = 8.6 Hz, 2H), 7.63 (d, *J* = 8.5 Hz, 2H), 7.29 (d, *J* = 8.3 Hz, 2H), 7.18 (d, *J* = 8.4 Hz, 2H), 3.80 (s, 3H), 2.41 (s, 3H). **<sup>13</sup>C NMR** (101 MHz, CDCl<sub>3</sub>) δ 184.4, 177.5, 167.7, 160.3, 155.6, 140.4, 135.2, 131.9 (2C), 131.3 (2C), 130.6 (2C), 129.6, 129.2, 126.1 (2C), 110.6, 54.0, 21.4.

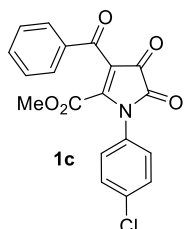

**<sup>1</sup>H NMR** (400 MHz, CDCl<sub>3</sub>) δ 7.84 (d, *J* = 8.4 Hz, 2H), 7.62 (t, *J* = 8.1 Hz, 1H), 7.52 – 7.45 (m, 4H), 7.30 – 7.21 (m, 2H), 3.77 (s, 3H). **<sup>13</sup>C NMR** (101 MHz, CDCl<sub>3</sub>) δ 185.5, 177.6, 165.4, 160.1, 155.2, 136.4, 136.0, 134.1, 130.9, 130.3 (2C), 129.8 (2C), 128.6 (2C), 127.6 (2C), 112.0, 54.1.

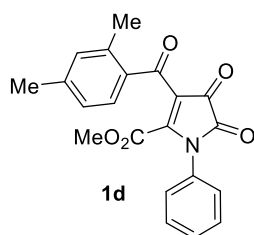

**<sup>1</sup>H NMR** (400 MHz, CDCl<sub>3</sub>) δ 7.55 – 7.44 (m, 3H), 7.41 – 7.35 (m, 1H), 7.35 – 7.24 (m, 2H), 7.14 – 6.98 (m, 2H), 3.72 (s, 3H), 2.45 (s, 3H), 2.37 (s, 3H). **<sup>13</sup>C NMR** (101 MHz, CDCl<sub>3</sub>) δ 187.1, 177.9, 165.7, 160.3, 155.4, 142.9, 138.7, 133.8, 132.5, 132.4, 130.7, 129.9 (2C), 129.8, 126.2 (2C), 126.1, 112.2, 53.8, 21.6, 20.5.

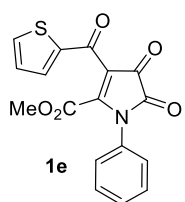

**<sup>1</sup>H NMR** (400 MHz, CDCl<sub>3</sub>) δ 8.17 (d, *J* = 3.9 Hz, 1H), 7.75 (d, *J* = 5.1 Hz, 1H), 7.56 – 7.45 (m, 3H), 7.34 – 7.29 (m, 2H), 7.25 – 7.18 (m, 1H), 3.81 (s, 3H). **<sup>13</sup>C NMR** (101 MHz, CDCl<sub>3</sub>) δ 177.1, 176.3, 167.8, 160.4, 155.5, 143.3, 135.7, 135.6, 132.2, 130.0 (3C), 128.7, 126.4 (2C), 110.8, 54.0.

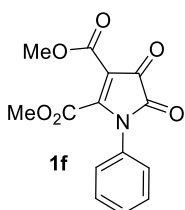

**<sup>1</sup>H NMR** (400 MHz, CDCl<sub>3</sub>) δ 7.55 – 7.42 (m, 3H), 7.32 – 7.22 (m, 2H), 3.84 (s, 3H), 3.81 (s, 3H). **<sup>13</sup>C NMR** (101 MHz, CDCl<sub>3</sub>) δ 176.6, 166.7, 160.3, 159.8, 155.1, 132.1, 130.04, 130.01 (2C), 126.5 (2C), 102.1, 54.0, 52.4.

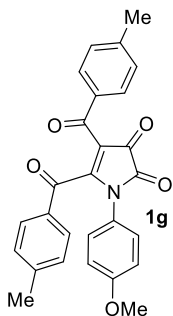

**<sup>1</sup>H NMR** (400 MHz, CDCl<sub>3</sub>) δ 7.78 (d, *J* = 8.2 Hz, 2H), 7.73 (d, *J* = 8.3 Hz, 2H), 7.27 – 7.20 (m, 4H), 7.07 (d, *J* = 9.0 Hz, 2H), 6.80 (d, *J* = 9.0 Hz, 2H), 3.74 (s, 3H), 2.41 (s, 3H), 2.39 (s, 3H). **<sup>13</sup>C NMR** (101 MHz, CDCl<sub>3</sub>) δ 187.2, 185.2, 177.8, 174.9, 160.4, 156.7, 146.8, 144.7, 134.1, 132.0, 130.1 (2C), 130.1 (2C), 129.1 (2C), 129.0 (2C), 128.5 (2C), 126.9, 115.1, 115.0 (2C), 55.6, 22.1, 21.9.

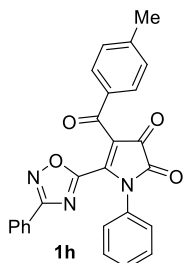

**<sup>1</sup>H NMR** (400 MHz, CDCl<sub>3</sub>) δ 7.88 – 7.72 (m, 4H), 7.55 – 7.34 (m, 6H), 7.32 – 7.18 (m, 4H), 2.39 (s, 3H). **<sup>13</sup>C NMR** (101 MHz, CDCl<sub>3</sub>) δ 185.6, 178.8, 169.3, 166.0, 155.1, 155.0, 145.6, 134.0, 132.7, 132.1, 129.9, 129.9, 129.6, 129.1, 127.7, 127.1, 125.3, 116.5, 21.9.

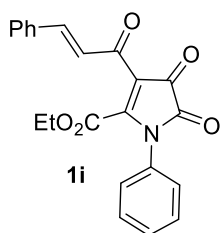

**<sup>1</sup>H NMR** (400 MHz, CDCl<sub>3</sub>) δ 7.82 (d, *J* = 15.7 Hz, 1H), 7.72 – 7.62 (m, 3H), 7.53 – 7.45 (m, 3H), 7.45 – 7.39 (m, 3H), 7.36 – 7.30 (m, 2H), 4.34 (q, *J* = 7.1 Hz, 2H), 1.19 (t, *J* = 7.1 Hz, 3H). **<sup>13</sup>C NMR** (101 MHz, CDCl<sub>3</sub>) δ 180.5, 178.7, 167.3, 160.0, 155.8, 145.1, 134.7, 131.9, 131.1, 130.1, 129.9 (2C), 129.11 (2C), 129.08 (2C), 126.8 (2C), 123.0, 109.7, 63.7, 13.8.

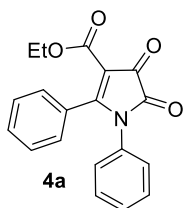

**<sup>1</sup>H NMR** (400 MHz, CDCl<sub>3</sub>) δ 7.49 – 7.38 (m, 1H), 7.36 – 7.22 (m, 7H), 7.02 – 6.91 (m, 2H), 4.16 (q, *J* = 7.1 Hz, 2H), 1.16 (t, *J* = 7.1 Hz, 3H). **<sup>13</sup>C NMR** (101 MHz, CDCl<sub>3</sub>) δ 178.1, 175.7, 161.0, 156.8, 132.8, 132.1, 129.4 (2C), 129.3 (2C), 128.7, 128.2 (2C), 127.70 (2C), 127.68, 105.0, 60.9, 14.1.

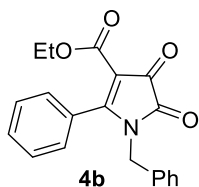

**<sup>1</sup>H NMR** (400 MHz, CDCl<sub>3</sub>) δ 7.55 (t, *J* = 7.5 Hz, 1H), 7.45 (t, *J* = 7.7 Hz, 2H), 7.30 – 7.09 (m, 5H), 6.92 – 6.75 (m, 2H), 4.66 (s, 2H), 4.07 (q, *J* = 7.1 Hz, 2H), 1.07 (t, *J* = 7.1 Hz, 3H). **<sup>13</sup>C NMR** (101 MHz, CDCl<sub>3</sub>) δ 178.4, 177.8, 160.6, 157.9, 135.3, 131.7, 128.9 (2C), 128.5 (2C), 128.2, 128.1, 127.9 (2C), 127.6 (2C), 104.6, 60.5, 45.1, 14.0.

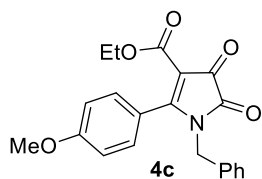

**<sup>1</sup>H NMR** (400 MHz, CDCl<sub>3</sub>) δ 7.28 – 7.19 (m, 5H), 6.96 (d, *J* = 8.8 Hz, 2H), 6.92 – 6.87 (m, 2H), 4.72 (s, 2H), 4.13 (q, *J* = 7.1 Hz, 2H), 3.88 (s, 3H), 1.17 (t, *J* = 7.1 Hz, 3H). **<sup>13</sup>C NMR** (101 MHz, CDCl<sub>3</sub>) δ 178.3, 177.9, 163.0, 161.2, 158.6, 135.6, 130.6 (2C), 128.9 (2C), 128.2, 127.5 (2C), 119.7, 114.1 (2C), 104.5, 60.6, 55.7, 45.3, 14.2.

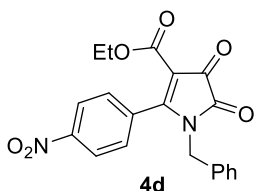

**<sup>1</sup>H NMR** (400 MHz, CDCl<sub>3</sub>) δ 8.27 (d, *J* = 8.7 Hz, 2H), 7.39 (d, *J* = 8.7 Hz, 2H), 7.31 – 7.17 (m, 3H), 6.87 – 6.73 (m, 2H), 4.66 (s, 2H), 4.09 (q, *J* = 7.1 Hz, 2H), 1.12 (t, *J* = 7.1 Hz, 3H). **<sup>13</sup>C NMR** (101 MHz, CDCl<sub>3</sub>) δ 177.8, 175.3, 160.2, 156.9, 149.5, 134.8, 134.2, 129.2 (2C), 129.2 (2C), 128.7, 127.4 (2C), 123.6 (2C), 104.9, 61.0, 45.3, 14.1.

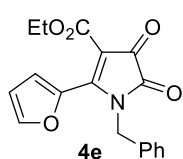

**<sup>1</sup>H NMR** (400 MHz, CDCl<sub>3</sub>) δ 7.81 (dd, *J* = 3.9, 0.7 Hz, 1H), 7.78 (dd, *J* = 1.7, 0.7 Hz, 1H), 7.30 – 7.18 (m, 3H), 7.07 – 7.01 (m, 2H), 6.66 (dd, *J* = 3.9, 1.7 Hz, 1H), 5.16 (s, 2H), 4.29 (q, *J* = 7.1 Hz, 2H), 1.33 (t, *J* = 7.1 Hz, 3H). **<sup>13</sup>C NMR** (101 MHz, CDCl<sub>3</sub>) δ 177.7, 161.8, 160.7, 158.7, 148.3, 141.3, 135.9, 128.9 (2C), 128.1, 127.4, 126.7 (2C), 114.3, 102.3, 61.1, 46.6, 14.4.

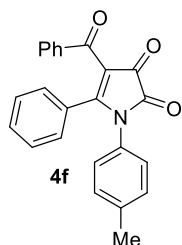

**$^1\text{H NMR}$**  (400 MHz,  $\text{CDCl}_3$ )  $\delta$  7.84 – 7.76 (m, 2H), 7.49 (t,  $J = 7.4$  Hz, 1H), 7.39 – 7.29 (m, 3H), 7.25 – 7.18 (m, 4H), 7.15 – 7.08 (m, 2H), 6.93 (d,  $J = 8.3$  Hz, 2H), 2.31 (s, 3H).  **$^{13}\text{C NMR}$**  (101 MHz,  $\text{CDCl}_3$ )  $\delta$  188.5, 179.0, 173.9, 157.5, 138.8, 137.3, 133.5, 132.4, 130.4, 130.1 (2C), 129.7 (2C), 129.5 (2C), 128.6 (2C), 128.5 (2C), 128.4, 127.6, 127.2 (2C), 113.1, 21.2.

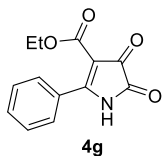

**$^1\text{H NMR}$**  (400 MHz,  $\text{CDCl}_3$ )  $\delta$  8.23 (s, 1H), 7.82 – 7.74 (m, 2H), 7.66 (t,  $J = 7.5$  Hz, 1H), 7.55 (t,  $J = 7.7$  Hz, 2H), 4.24 (q,  $J = 7.1$  Hz, 2H), 1.25 (t,  $J = 7.1$  Hz, 3H).  **$^{13}\text{C NMR}$**  (101 MHz,  $\text{CDCl}_3$ )  $\delta$  178.5, 172.5, 161.5, 157.9, 134.3, 129.1 (2C), 129.0 (2C), 128.3, 104.1, 61.1, 14.2.

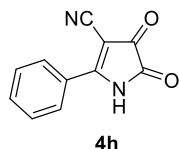

**$^1\text{H NMR}$**  (400 MHz,  $\text{DMSO-}d_6$ )  $\delta$  12.21 (s, 1H), 8.14 – 8.06 (m, 2H), 7.92 – 7.81 (m, 1H), 7.77 – 7.67 (m, 2H).  **$^{13}\text{C NMR}$**  (101 MHz,  $\text{DMSO-}d_6$ )  $\delta$  178.9, 173.9, 159.2, 135.6, 129.6 (2C), 128.5 (2C), 126.3, 113.6, 81.9.

**General procedure SM3 (synthesis of sulfonium salts):**  $\text{Me}_2\text{S}$  (1.5 equiv.) is added to the solution of the corresponding alkyl bromides (1 equiv.) in acetone (1M solution) and the solution is stirred at RT for 2 days. The resulting precipitate is filtered, washed with acetone and dried to give sulfonium salts **2a–c** [9, 10], **2f** [11] as a white powder.

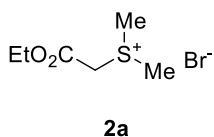

Sulfonium salt **2a**: according to **GP SM3** from ethyl bromoacetate and dimethyl sulfide.

**$^1\text{H NMR}$**  (400 MHz,  $\text{DMSO-}d_6$ )  $\delta$  4.76 (s, 2H), 4.24 (q,  $J = 7.1$  Hz, 2H), 3.06 (s, 6H), 1.25 (t,  $J = 7.1$  Hz, 3H).  **$^{13}\text{C NMR}$**  (101 MHz,  $\text{DMSO-}d_6$ )  $\delta$  164.5, 62.6, 44.3, 24.7, 13.7.

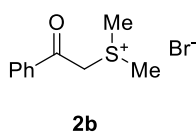

Sulfonium salt **2b**: according to **GP SM3** from phenacyl bromide and dimethyl sulfide.

**$^1\text{H NMR}$**  (400 MHz,  $\text{DMSO-}d_6$ )  $\delta$  8.07 – 7.99 (m, 2H), 7.78 (t,  $J = 7.4$  Hz, 1H), 7.69 – 7.59 (m, 2H), 5.71 (s, 2H), 3.07 (s, 6H).  **$^{13}\text{C NMR}$**  (101 MHz,  $\text{DMSO-}d_6$ )  $\delta$  191.3, 134.8, 133.8, 129.0, 128.5, 52.7, 24.5.

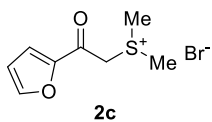

Sulfonium salt **2c**: according to **GP SM3** from 2-bromo-1-(furan-2-yl)ethan-1-one and dimethyl sulfide.

**$^1\text{H NMR}$**  (400 MHz,  $\text{DMSO-}d_6$ )  $\delta$  8.18 (dd,  $J = 1.7, 0.7$  Hz, 1H), 7.73 (dd,  $J = 3.7, 0.7$  Hz, 1H), 6.85 (dd,  $J = 3.7, 1.7$  Hz, 1H), 5.39 (s, 2H), 3.06 (s, 6H).  **$^{13}\text{C NMR}$**  (101 MHz,  $\text{DMSO-}d_6$ )  $\delta$  178.3, 149.7, 149.5, 121.7, 113.2, 50.5.

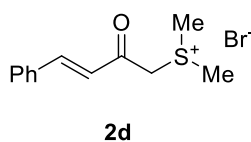

Sulfonium salt **2d**:  $\text{CuBr}_2$  (2.669 g, 1.05 equiv.) is added to the solution of benzylideneacetone (1.661 g, 1 equiv.) in 20 mL EtOAc at room temperature. The resulting solution is stirred at RT for 2 days, filtered through Celite and washed with 10 mL EtOAc.  $\text{Me}_2\text{S}$  (1.25 mL, 1.5 equiv.) is added to the filtered EtOAc solution and the solution is stirred at RT for 2 days. The resulting precipitate is filtered, washed with EtOAc and dried. Brownish solid, 740 mg (23% in 2 steps).

**$^1\text{H NMR}$**  (400 MHz,  $\text{DMSO-}d_6$ )  $\delta$  7.88 (d,  $J = 16.4$  Hz, 1H), 7.82 – 7.75 (m, 2H), 7.54 – 7.40 (m, 3H), 7.03 (d,  $J = 16.4$  Hz, 1H), 5.25 (s, 2H), 2.99 (s, 6H).  **$^{13}\text{C NMR}$**  (101 MHz,  $\text{DMSO-}d_6$ )  $\delta$  190.8, 146.6, 133.5, 131.3, 129.0 (2C), 128.7 (2C), 123.9, 52.6, 24.4.

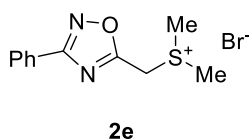

Sulfonium salt **2e**:  $\text{Me}_2\text{S}$  (111  $\mu\text{L}$ , 1.5 equiv.) is added to the solution of 5-(bromomethyl)-3-phenyl-1,2,4-oxadiazole [12] (239 mg, 1 equiv.) in acetone (1 mL) and the solution is stirred at RT for 2 days. The resulting precipitate is filtered, washed with acetone and dried. Off-white solid, 168 mg (56%).

**$^1\text{H NMR}$**  (400 MHz,  $\text{DMSO-}d_6$ )  $\delta$  8.36 – 8.24 (m, 2H), 8.02 – 7.79 (m, 3H), 5.61 (s, 2H), 3.43 (s, 6H).  **$^{13}\text{C NMR}$**  (101 MHz,  $\text{DMSO-}d_6$ )  $\delta$  170.3, 168.0, 131.8, 129.2 (2C), 127.1 (2C), 125.4, 35.7, 25.0.

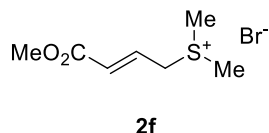

Sulfonium salt **2f**: according to **GP SM3** from methyl (*E*)-4-bromobut-2-enoate and dimethyl sulfide

**<sup>1</sup>H NMR** (400 MHz, DMSO-*d*<sub>6</sub>) δ 6.40 (dt, *J* = 15.4, 7.6 Hz, 1H), 5.93 (dt, *J* = 15.5, 1.2 Hz, 1H), 3.96 (dd, *J* = 7.6, 1.3 Hz, 2H), 3.26 (s, 3H), 2.51 (s, 6H). **<sup>13</sup>C NMR** (101 MHz, DMSO-*d*<sub>6</sub>) δ 164.6, 134.1, 129.4, 51.7, 41.8, 23.8.

## Synthesis of products **3**, **4** and **6**

**General procedure A** (cyclopropanation of pyrrole-2,3-diones): NEt<sub>3</sub> (1.1 equiv.) is added to the solution of the pyrrole-2,3-dione **1** (1 equiv.) and the sulfonium salt **2** (1.05 equiv.) in dry acetonitrile (1.5 mL / 0.3 mmol of **1**) and the mixture is stirred at room temperature for 30-60 min. The solvent is then evaporated under reduced pressure and the residue is purified by crystallization or flash column chromatography to afford the cyclopropane **3** (loading in the minimum volume of dichloromethane).

**General procedure B** (ring-expansion of pyrrole-2,3-diones): NEt<sub>3</sub> (1.1 equiv.) is added to the reaction vial containing a solution of the pyrrole-2,3-dione **4** (1 equiv.) and the sulfonium salt **2** (1.05 equiv.) in dry acetonitrile (1.5 mL / 0.3 mmol of **4**) and the mixture is stirred at room temperature for 30 min, then the vial is placed in a heating block preheated to 80 °C for 1-2 h (TLC or HPLC control). The solvent is then evaporated under reduced pressure and the residue is purified by crystallization to afford the pyridine-2,3-dione **5**. Alternatively, Boc<sub>2</sub>O (2 equiv.) is added to the reaction vial at room temperature, followed by a catalytic amount of DMAP and the mixture is stirred overnight at RT. The solvent is then evaporated and the residue is purified by flash column chromatography (loading in the minimum volume of dichloromethane) to give *O*-Boc pyridine-2,3-dione **5-Boc**.

**General procedure C** (ring-opening of cyclopropanes **3**): concentrated H<sub>2</sub>SO<sub>4</sub> (1 mL per 0.3 mmol of cyclopropane **3**) is added to the test tube containing cyclopropane **3** and the solution stirred at room temperature for 2 h. Ice water (20 mL) is added to the solution cooled in an ice-water bath and the resulting solution is extracted with ethyl acetate (30 mL). The water phase is washed with additional 10 mL of EtOAc and the combined EtOAc phase is washed with water (20 mL×3) until neutral medium is reached. EtOAc is evaporated under reduced pressure and the residue is recrystallized to afford pyridine-2,3-dione **6**.

### 6-Ethyl 1-methyl (1*R*\*,5*S*\*,6*R*\*)-5-benzoyl-3,4-dioxo-2-phenyl-2-azabicyclo[3.1.0]hexane-1,6-dicarboxylate (**3aa**)

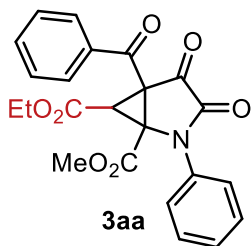

According to **GP A** from pyrrole-2,3-dione **1a** (0.3 mmol scale) and sulfonium salt **2a**. Isolation by flash column chromatography (PhMe/EtOAc 12/1) gave a white powder (110 mg, 87%). Running the reaction on the 2 mmol scale and isolating by crystallization from EtOH gave 708 mg (84%) of product **3aa**. Scale-up reaction (5 mmol scale) gave 1.925 g (91%) of product **3aa** after crystallization from EtOH. mp 159–161 °C, *R*<sub>f</sub> = 0.6 (PhMe/EtOAc 5/1).

**<sup>1</sup>H NMR** (400 MHz, CDCl<sub>3</sub>) δ 7.87 – 7.80 (m, 2H), 7.66 (t, *J* = 7.4 Hz, 1H), 7.61 – 7.49 (m, 4H), 7.48 – 7.41 (m, 2H), 7.30 (t, *J* = 7.5 Hz, 1H), 4.18 (q, *J* = 7.1 Hz, 2H), 4.15 (s, 1H), 3.58 (s, 3H), 1.16 (t, *J* = 7.1 Hz, 3H). **<sup>13</sup>C NMR** (101 MHz, CDCl<sub>3</sub>) δ 186.6, 185.1, 165.4, 164.2, 156.7, 136.7, 135.0, 134.2, 129.7 (2C), 129.6 (2C), 129.3 (2C), 127.1, 120.1 (2C), 63.9, 54.8, 54.0, 46.8, 45.7, 13.9. **IR** (mineral oil), cm<sup>-1</sup>: 1782, 1755, 1742, 1723, 1670, 1595, 1579. **HRMS** (ESI): *m/z* calcd for C<sub>23</sub>H<sub>19</sub>NO<sub>7</sub>: 444.1054 [M+Na]<sup>+</sup>; found: 444.1055.

6-Ethyl 1-methyl  
dicarboxylate (3ba)

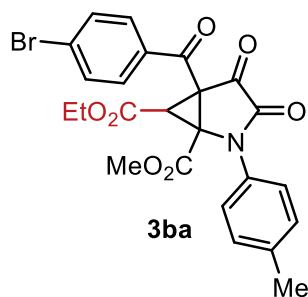

(1*R*\*,5*S*\*,6*R*\*)-5-(4-bromobenzoyl)-3,4-dioxo-2-(*p*-tolyl)-2-azabicyclo[3.1.0]hexane-1,6-

According to **GP A** from pyrrole-2,3-dione **1b** (0.5 mmol scale) and sulfonium salt **2a**. Isolation by crystallization from EtOH gave a white powder (188 mg, 73%). mp 213–215 °C,  $R_f = 0.67$  (PhMe/EtOAc 5/1).

**<sup>1</sup>H NMR** (400 MHz, CDCl<sub>3</sub>) δ 7.75 – 7.63 (m, 4H), 7.43 (d,  $J = 8.5$  Hz, 2H), 7.24 (d,  $J = 8.4$  Hz, 2H), 4.18 (d,  $J = 7.2$  Hz, 2H), 4.10 (s, 1H), 3.62 (s, 3H), 2.37 (s, 3H), 1.17 (t,  $J = 7.1$  Hz, 3H). **<sup>13</sup>C NMR** (101 MHz, CDCl<sub>3</sub>) δ 185.8, 185.0, 165.2, 164.2, 156.5, 137.2, 134.0, 133.1, 132.8 (2C), 131.1 (2C), 130.7, 130.2 (2C), 120.0 (2C), 64.0, 54.8, 54.1, 46.5, 45.8, 21.2, 14.0. **IR** (mineral oil), cm<sup>-1</sup>: 1782, 1750, 1724, 1676, 1581, 1567, 1515. **HRMS** (ESI):  $m/z$  calcd for C<sub>24</sub>H<sub>20</sub>BrNO<sub>7</sub>: 536.0315 [M+Na]<sup>+</sup>; found: 536.0314.

6-Ethyl 1-methyl  
dicarboxylate (3ca)

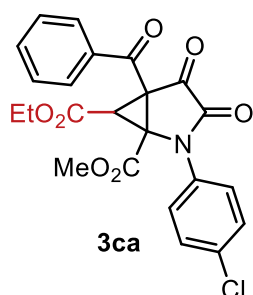

(1*R*\*,5*S*\*,6*R*\*)-5-benzoyl-2-(4-chlorophenyl)-3,4-dioxo-2-azabicyclo[3.1.0]hexane-1,6-

According to **GP A** from pyrrole-2,3-dione **1c** (0.3 mmol scale) and sulfonium salt **2a**. Isolation by crystallization from EtOH gave a white powder (113 mg, 82%). mp 167–169 °C,  $R_f = 0.6$  (PhMe/EtOAc 5/1).

**<sup>1</sup>H NMR** (400 MHz, CDCl<sub>3</sub>) δ 7.87 – 7.78 (m, 2H), 7.72 – 7.62 (m, 1H), 7.57 – 7.49 (m, 4H), 7.47 – 7.37 (m, 2H), 4.18 (q,  $J = 6.8$  Hz, 2H), 4.13 (s, 1H), 3.60 (s, 3H), 1.17 (t,  $J = 7.1$  Hz, 3H). **<sup>13</sup>C NMR** (101 MHz, CDCl<sub>3</sub>) δ 186.3, 184.6, 165.3, 164.0, 156.6, 135.2, 135.1, 134.1, 132.7, 129.7 (2C), 129.7 (2C), 129.4 (2C), 121.3 (2C), 64.0, 54.6, 54.1, 46.8, 45.5, 14.0. **IR** (mineral oil), cm<sup>-1</sup>: 1781, 1758, 1751, 1721, 1673, 1595, 1580. **HRMS** (ESI):  $m/z$  calcd for C<sub>23</sub>H<sub>18</sub>ClNO<sub>7</sub>: 478.0664 [M+Na]<sup>+</sup>; found: 478.0669.

6-Ethyl 1-methyl  
dicarboxylate (3da)

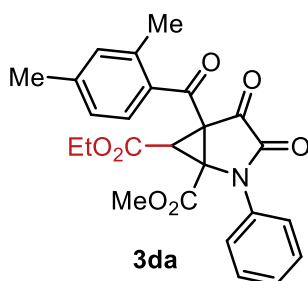

(1*R*\*,5*S*\*,6*R*\*)-5-(2,4-dimethylbenzoyl)-3,4-dioxo-2-phenyl-2-azabicyclo[3.1.0]hexane-1,6-

According to **GP A** from pyrrole-2,3-dione **1d** (0.3 mmol scale) and sulfonium salt **2a**. Isolation by flash column chromatography (PhMe/EtOAc 15/1) gave a viscous pale-yellow oil (128 mg, 95%).  $R_f = 0.6$  (PhMe/EtOAc 5/1).

**<sup>1</sup>H NMR** (400 MHz, CDCl<sub>3</sub>) δ 7.67 (d,  $J = 7.9$  Hz, 2H), 7.56 (t,  $J = 7.9$  Hz, 3H), 7.45 – 7.36 (m, 2H), 7.25 (s, 1H), 4.27 (q,  $J = 6.9$  Hz, 2H), 4.26 (s, 1H), 3.74 (s, 3H), 2.65 (s, 3H), 2.50 (s, 3H), 1.26 (t,  $J = 7.1$  Hz, 3H). **<sup>13</sup>C NMR** (101 MHz, CDCl<sub>3</sub>) δ 187.7, 185.6, 165.5, 164.3, 156.9, 144.7, 141.9, 136.8, 133.7, 131.4, 131.1, 129.5 (2C), 127.2, 127.0, 120.1 (2C), 63.7, 55.5, 54.0, 48.2, 45.9, 21.8, 21.7, 13.9. **IR** (CHCl<sub>3</sub>), cm<sup>-1</sup>: 1770, 1745, 1678, 1612, 1497. **HRMS** (ESI):  $m/z$  calcd for C<sub>25</sub>H<sub>23</sub>NO<sub>7</sub>: 472.1367 [M+Na]<sup>+</sup>; found: 472.1365.

6-Ethyl 1-methyl  
dicarboxylate (3ea)

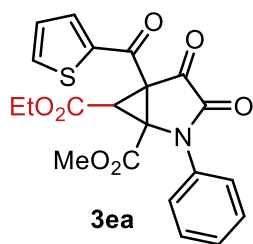

(1*R*\*,5*R*\*,6*R*\*)-3,4-dioxo-2-phenyl-5-(thiophene-2-carbonyl)-2-azabicyclo[3.1.0]hexane-1,6-

According to **GP A** from pyrrole-2,3-dione **1e** (0.3 mmol scale) and sulfonium salt **2a**. Isolation by crystallization from EtOH gave a pale-beige powder (83 mg, 64%). mp 134–135 °C,  $R_f = 0.5$  (PhMe/EtOAc 5/1).

**<sup>1</sup>H NMR** (400 MHz, CDCl<sub>3</sub>) δ 7.81 (dd,  $J = 5.0, 1.1$  Hz, 1H), 7.64 (dd,  $J = 3.9, 1.1$  Hz, 1H), 7.59 – 7.52 (m, 2H), 7.44 (t,  $J = 8.0$  Hz, 2H), 7.29 (t,  $J = 7.4$  Hz, 1H), 7.20 (dd,  $J = 4.9, 3.9$  Hz, 1H), 4.19 (s, 1H), 4.17 (d,  $J = 7.1$  Hz, 2H), 3.60 (s, 3H), 1.16 (t,  $J = 7.1$  Hz, 3H). **<sup>13</sup>C NMR** (101 MHz, CDCl<sub>3</sub>) δ 184.9, 178.5, 165.3, 164.0, 156.7, 141.2, 136.9, 136.6, 135.5, 129.6 (2C), 129.0, 127.1, 120.1 (2C), 63.9, 54.7, 54.0, 47.1, 45.8, 13.9. **IR** (mineral oil), cm<sup>-1</sup>: 1776, 1756, 1742, 1715, 1661, 1589, 1516, 1496. **HRMS** (ESI):  $m/z$  calcd for C<sub>21</sub>H<sub>17</sub>NO<sub>7</sub>S: 450.0618 [M+Na]<sup>+</sup>; found: 450.0618.

### 6-Ethyl 1,5-dimethyl (1*R*\*,5*R*\*,6*R*\*)-3,4-dioxo-2-phenyl-2-azabicyclo[3.1.0]hexane-1,5,6-tricarboxylate (3fa)

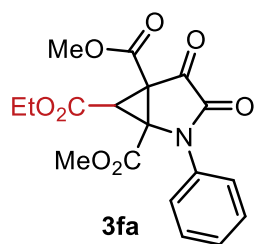

According to **GP A** from pyrrole-2,3-dione **1f** (0.3 mmol scale) and sulfonium salt **2a**. Isolation by flash column chromatography (PhMe/EtOAc 12/1) gave a white powder (83 mg, 73%).  $R_f = 0.5$  (PhMe/EtOAc 5/1).

**<sup>1</sup>H NMR** (400 MHz, CDCl<sub>3</sub>) δ 7.45 – 7.39 (m, 2H), 7.38 – 7.31 (m, 2H), 7.25 – 7.19 (m, 1H), 4.09 (s, 1H), 4.05 (qd,  $J = 7.1, 1.1$  Hz, 2H), 3.78 (s, 3H), 3.63 (s, 3H), 1.07 (t,  $J = 7.1$  Hz, 3H). **<sup>13</sup>C NMR** (101 MHz, CDCl<sub>3</sub>) δ 183.6, 164.9, 163.7, 162.7, 156.6, 136.5, 129.6, 127.2 (2C), 120.2 (2C), 63.8, 55.1, 54.2 (2C), 45.4, 41.9, 13.9. **IR** (mineral oil), cm<sup>-1</sup>: 1776, 1746, 1724, 1596, 1497. HRMS (ESI):  $m/z$  calcd for C<sub>18</sub>H<sub>17</sub>NO<sub>8</sub>: 398.0846 [M+Na]<sup>+</sup>; found: 398.0844.

### Ethyl (1*R*\*,5*S*\*,6*R*\*)-2-(4-methoxyphenyl)-1,5-bis(4-methylbenzoyl)-3,4-dioxo-2-azabicyclo[3.1.0]hexane-6-carboxylate (3ga)

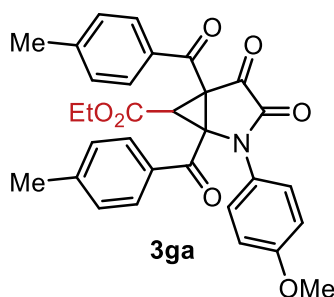

According to **GP A** from pyrrole-2,3-dione **1g** (0.5 mmol scale) and sulfonium salt **2a**. Isolation by crystallization from EtOH gave a yellow powder (199 mg, 76%). mp 178–180 °C,  $R_f = 0.7$  (PhMe/EtOAc 5/1).

**<sup>1</sup>H NMR** (400 MHz, CDCl<sub>3</sub>) δ 7.84 (d,  $J = 8.3$  Hz, 2H), 7.64 (d,  $J = 8.3$  Hz, 2H), 7.32 (d,  $J = 8.1$  Hz, 2H), 7.26 (d,  $J = 9.1$  Hz, 2H), 7.12 (d,  $J = 8.0$  Hz, 2H), 6.75 (d,  $J = 9.1$  Hz, 2H), 4.25 (s, 1H), 4.22 (qd,  $J = 7.1, 1.1$  Hz, 2H), 3.71 (s, 3H), 2.45 (s, 3H), 2.33 (s, 3H), 1.19 (t,  $J = 7.1$  Hz, 3H). **<sup>13</sup>C NMR** (101 MHz, CDCl<sub>3</sub>) δ 190.4, 186.3, 185.3, 166.0, 158.2, 156.7, 146.5, 144.9, 132.9, 132.3, 130.6 (2C), 129.9 (2C), 129.3 (2C), 129.2, 128.9 (2C), 122.0 (2C), 114.6 (2C), 63.8, 60.0, 55.5, 49.8, 45.6, 22.0, 21.8, 14.0. **IR** (mineral oil), cm<sup>-1</sup>: 1766, 1735, 1674, 1602, 1571, 1510. HRMS (ESI):  $m/z$  calcd for C<sub>31</sub>H<sub>27</sub>NO<sub>7</sub>: 548.1680 [M+Na]<sup>+</sup>; found: 548.1675.

### Ethyl (1*R*\*,5*S*\*,6*R*\*)-5-(4-methylbenzoyl)-3,4-dioxo-2-phenyl-1-(3-phenyl-1,2,4-oxadiazol-5-yl)-2-azabicyclo[3.1.0]hexane-6-carboxylate (3ha)

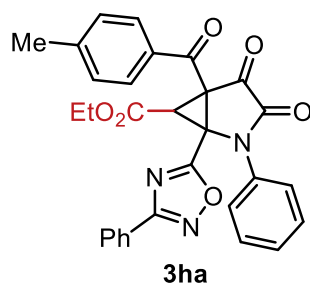

According to **GP A** from pyrrole-2,3-dione **1h** (0.3 mmol scale) and sulfonium salt **2a**. Isolation by crystallization from EtOH gave an off-white powder (134 mg, 85%). mp 188–190 °C,  $R_f = 0.8$  (PhMe/EtOAc 5/1).

**<sup>1</sup>H NMR** (400 MHz, CDCl<sub>3</sub>) δ 7.96 – 7.87 (m, 2H), 7.67 (d,  $J = 8.3$  Hz, 2H), 7.62 – 7.54 (m, 2H), 7.51 – 7.45 (m, 1H), 7.44 – 7.37 (m, 4H), 7.31 – 7.21 (m, 3H), 4.51 (s, 1H), 4.26 (q,  $J = 7.1$  Hz, 2H), 2.40 (s, 3H), 1.23 (t,  $J = 7.1$  Hz, 3H). **<sup>13</sup>C NMR** (101 MHz, CDCl<sub>3</sub>) δ 185.5, 184.5, 170.9, 168.9, 165.2, 156.6, 146.5, 135.7, 131.9, 131.6, 130.0 (2C), 129.9 (2C), 129.8 (2C), 129.0 (2C), 127.7 (2C), 127.6, 125.8, 120.9 (2C), 64.2, 51.2, 47.4, 46.0, 22.0, 14.0. **IR** (mineral oil), cm<sup>-1</sup>: 1778, 1762, 1727, 1680, 1600, 1525. HRMS (ESI):  $m/z$  calcd for C<sub>30</sub>H<sub>23</sub>N<sub>3</sub>O<sub>6</sub>: 544.1479 [M+Na]<sup>+</sup>; found: 544.1474.

### Diethyl (1*R*\*,5*S*\*,6*R*\*)-5-cinnamoyl-3,4-dioxo-2-phenyl-2-azabicyclo[3.1.0]hexane-1,6-dicarboxylate (3ia)

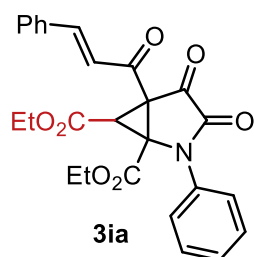

According to **GP A** from pyrrole-2,3-dione **1i** (1.0 mmol scale) and sulfonium salt **2a**. Isolation by recrystallization from EtOH/Me<sub>2</sub>CO gave an off-white powder (359 mg, 78%). mp 169–171 °C,  $R_f = 0.64$  (PhMe/EtOAc 5/1).

**<sup>1</sup>H NMR** (400 MHz, CDCl<sub>3</sub>) δ 7.68 (d,  $J = 15.9$  Hz, 1H), 7.63 – 7.57 (m, 2H), 7.57 – 7.51 (m, 2H), 7.49 – 7.37 (m, 5H), 7.33 – 7.25 (m, 1H), 7.14 (d,  $J = 15.9$  Hz, 1H), 4.21 (s, 1H), 4.20 – 4.05 (m, 4H), 1.17 (t,  $J = 7.1$  Hz, 3H), 1.02 (t,  $J = 7.1$  Hz, 3H). **<sup>13</sup>C NMR** (101 MHz, CDCl<sub>3</sub>) δ 186.2, 185.2, 165.4, 163.1, 156.8, 147.7, 136.4, 133.8, 131.9, 129.5 (2C), 129.3 (2C), 129.2 (2C), 127.2, 122.6, 120.5 (2C), 63.7, 63.6, 56.4, 46.8 (2C), 13.9, 13.8. **IR** (mineral oil), cm<sup>-1</sup>: 1778, 1741, 1726, 1684, 1646, 1604, 1574, 1495. Anal. Calcd for C<sub>26</sub>H<sub>23</sub>NO<sub>7</sub>: C 67.67; H 5.02; N 3.04. Found: C 68.00; H 5.01; N 3.29.



### Methyl (1*R*\*,5*S*\*,6*R*\*)-5,6-dibenzoyl-3,4-dioxo-2-phenyl-2-azabicyclo[3.1.0]hexane-1-carboxylate (3ab)

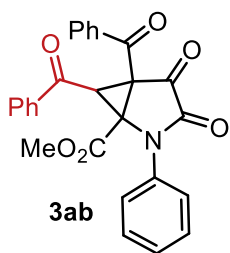

According to **GP A** from pyrrole-2,3-dione **1a** (0.3 mmol scale) and sulfonium salt **2b**. Isolation by crystallization from EtOH gave an off-white powder (105 mg, 77%). mp 184–186 °C,  $R_f = 0.1$  (PhMe/EtOAc 4/1).

**<sup>1</sup>H NMR** (400 MHz, CDCl<sub>3</sub>) δ 8.13 – 8.06 (m, 2H), 7.92 – 7.82 (m, 2H), 7.70 (t,  $J = 7.5$  Hz, 1H), 7.64 (t,  $J = 7.5$  Hz, 1H), 7.59 – 7.47 (m, 4H), 7.40 – 7.30 (m, 2H), 7.27 – 7.21 (m, 2H), 7.19 – 7.11 (m, 1H), 5.16 (s, 1H), 3.67 (s, 3H). **<sup>13</sup>C NMR** (101 MHz, CDCl<sub>3</sub>) δ 189.9, 187.0, 185.5, 164.8, 157.0, 136.7, 135.4, 135.0, 134.6, 134.3, 130.0 (2C), 129.5 (4C), 129.4 (2C), 129.3 (2C), 126.8, 120.3 (2C), 57.0, 54.2, 50.2, 48.2. **IR** (mineral oil), cm<sup>-1</sup>: 1769, 1742, 1730, 1670, 1590, 1576, 1495. HRMS (ESI):  $m/z$  calcd for C<sub>27</sub>H<sub>19</sub>NO<sub>6</sub>: 476.1105 [M+Na]<sup>+</sup>; found: 476.1104.

### Dimethyl (1*R*\*,5*R*\*,6*R*\*)-6-benzoyl-3,4-dioxo-2-phenyl-2-azabicyclo[3.1.0]hexane-1,5-dicarboxylate (3fb)

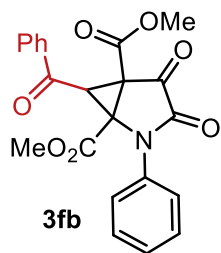

According to **GP A** from pyrrole-2,3-dione **1f** (0.3 mmol scale) and sulfonium salt **2b**. Isolation by crystallization from EtOH gave a white powder (95 mg, 78%). mp 190–192 °C,  $R_f = 0.35$  (PhMe/EtOAc 5/1).

**<sup>1</sup>H NMR** (400 MHz, CDCl<sub>3</sub>) δ 8.07 (d,  $J = 7.1$  Hz, 2H), 7.69 (t,  $J = 7.5$  Hz, 1H), 7.55 (t,  $J = 7.8$  Hz, 2H), 7.33 – 7.18 (m, 4H), 7.13 (t,  $J = 7.2$  Hz, 1H), 5.18 (s, 1H), 3.86 (s, 3H), 3.74 (s, 3H). **<sup>13</sup>C NMR** (101 MHz, CDCl<sub>3</sub>) δ 189.5, 183.9, 164.1, 163.2, 156.8, 136.4, 135.3, 134.7, 129.4 (2C), 129.4 (2C), 129.3 (2C), 126.9, 120.5 (2C), 57.5, 54.3, 54.1, 49.9, 43.0. **IR** (mineral oil), cm<sup>-1</sup>: 1783, 1736, 1660, 1595, 1579, 1497. HRMS (ESI):  $m/z$  calcd for C<sub>22</sub>H<sub>17</sub>NO<sub>7</sub>: 430.0897 [M+H]<sup>+</sup>; found: 430.0896.

### Methyl (1*R*\*,5*S*\*,6*R*\*)-5-benzoyl-6-(furan-2-carbonyl)-3,4-dioxo-2-phenyl-2-azabicyclo[3.1.0]hexane-1-carboxylate (3ac)

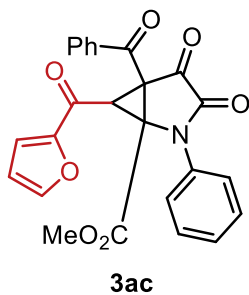

According to **GP A** from pyrrole-2,3-dione **1a** (0.3 mmol scale) and sulfonium salt **2c**. Isolation by crystallization from EtOH gave a pale-yellow powder (117 mg, 88%). mp 182–184 °C,  $R_f = 0.41$  (PhMe/EtOAc 5/1).

**<sup>1</sup>H NMR** (400 MHz, CDCl<sub>3</sub>) δ 7.88 – 7.82 (m, 2H), 7.76 (dd,  $J = 1.7, 0.7$  Hz, 1H), 7.71 – 7.60 (m, 1H), 7.60 – 7.46 (m, 2H), 7.44 – 7.36 (m, 3H), 7.33 – 7.24 (m, 2H), 7.23 – 7.12 (m, 1H), 6.66 (dd,  $J = 3.7, 1.7$  Hz, 1H), 5.04 (s, 1H), 3.64 (s, 3H). **<sup>13</sup>C NMR** (101 MHz, CDCl<sub>3</sub>) δ 186.9, 185.3, 177.9, 164.5, 156.8, 151.3, 148.8, 136.9, 135.0, 134.3, 129.9 (2C), 129.4 (2C), 129.3 (2C), 126.8, 120.8, 119.7 (2C), 113.9, 56.5, 54.1, 49.7, 47.8. **IR** (mineral oil), cm<sup>-1</sup>: 1759, 1737, 1691, 1693, 11596, 1580, 1596, 1495. Anal. Calcd for C<sub>25</sub>H<sub>17</sub>NO<sub>7</sub>: C 67.72; H 3.86; N 3.16. Found: C 67.82; H 4.03; N 3.18.

### Methyl (1*R*\*,5*S*\*,6*R*\*)-5-benzoyl-6-cinnamoyl-3,4-dioxo-2-phenyl-2-azabicyclo[3.1.0]hexane-1-carboxylate (3ad)

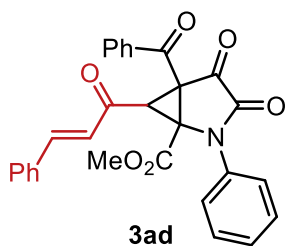

According to **GP A** from pyrrole-2,3-dione **1a** (0.3 mmol scale) and sulfonium salt **2d**. Isolation by crystallization from EtOH gave a beige powder (94 mg, 65%). mp 185–187 °C,  $R_f = 0.58$  (PhMe/EtOAc 5/1).

**<sup>1</sup>H NMR** (400 MHz, CDCl<sub>3</sub>) δ 7.86 (d,  $J = 7.8$  Hz, 2H), 7.81 (d,  $J = 16.0$  Hz, 1H), 7.65 (t,  $J = 7.5$  Hz, 1H), 7.60 (d,  $J = 7.4$  Hz, 2H), 7.47 (tt,  $J = 14.3, 7.3$  Hz, 7H), 7.35 (t,  $J = 7.8$  Hz, 2H), 7.20 (t,  $J = 7.4$  Hz, 1H), 7.05 (d,  $J = 16.0$  Hz, 1H), 4.72 (s, 1H), 3.64 (s, 3H). **<sup>13</sup>C NMR** (101 MHz, CDCl<sub>3</sub>) δ 189.1, 187.0, 185.5, 164.8, 157.0, 148.1, 136.9, 135.0, 134.4, 133.6, 132.1, 129.9 (2C), 129.5 (2C), 129.4 (2C), 129.3 (2C), 129.2 (2C), 126.8, 123.6, 120.1 (2C), 56.8, 54.1, 51.5, 48.4. **IR** (mineral oil), cm<sup>-1</sup>: 1759, 1732, 1691, 1660, 1590, 1572, 1495. Anal. Calcd for C<sub>29</sub>H<sub>21</sub>NO<sub>6</sub>: C 72.64; H 4.41; N 2.92. Found: C 72.95; H 4.29; N 2.76.

**Methyl (1*R*\*,5*S*\*,6*R*\*)-5-benzoyl-3,4-dioxo-2-phenyl-6-(3-phenyl-1,2,4-oxadiazol-5-yl)-2-azabicyclo[3.1.0]hexane-1-carboxylate (3ae)**

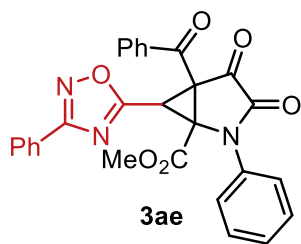

According to **GP A** from pyrrole-2,3-dione **1a** (0.3 mmol scale) and sulfonium salt **2e**. Isolation by crystallization from EtOH gave an off-white powder (105 mg, 71%). mp 195–197 °C,  $R_f = 0.62$  (PhMe/EtOAc 5/1).

**<sup>1</sup>H NMR** (400 MHz, CDCl<sub>3</sub>) δ 7.92 – 7.79 (m, 4H), 7.68 (t,  $J = 7.5$  Hz, 1H), 7.54 (t,  $J = 7.3$  Hz, 2H), 7.50 – 7.33 (m, 7H), 7.30 – 7.18 (m, 1H), 4.76 (d,  $J = 1.2$  Hz, 1H), 3.64 (d,  $J = 1.2$  Hz, 3H). **<sup>13</sup>C NMR** (101 MHz, CDCl<sub>3</sub>) δ 186.2, 184.2, 170.7, 168.9, 163.9, 156.7, 136.3, 135.3, 134.1, 132.0, 129.8 (2C), 129.7 (2C), 129.5 (2C), 129.1 (2C), 127.9 (2C), 127.4, 125.3, 120.0 (2C), 55.7, 54.2, 47.1, 38.1. **IR** (mineral oil), cm<sup>-1</sup>: 1772, 1753, 1739, 1681, 1594, 1512. Anal. Calcd for C<sub>28</sub>H<sub>19</sub>N<sub>3</sub>O<sub>6</sub>: C 68.15; H 3.88; N 8.52. Found: C 68.27; H 4.03; N 8.51.

**Diethyl 5-hydroxy-6-oxo-1,2-diphenyl-1,6-dihydropyridine-3,4-dicarboxylate (5aa)**

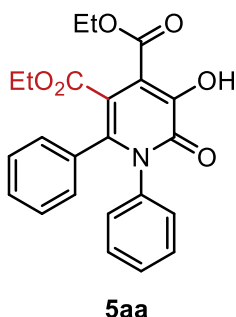

According to **GP B** from pyrrole-2,3-dione **4a** (0.3 mmol scale) and sulfonium salt **2a**. Isolation by crystallization from EtOH/H<sub>2</sub>O gave an off-white powder (72 mg, 59%). Running the reaction on the 2 mmol scale and isolating by crystallization from EtOH gave 401 mg (49%) of product **5aa**. Scale-up reaction (4 mmol scale) gave 772 mg (47%) of product **5aa** after crystallization from EtOH/H<sub>2</sub>O. mp 152–153 °C,  $R_f = 0.6$  (Hexanes/EtOAc 1/1).

**<sup>1</sup>H NMR** (400 MHz, CDCl<sub>3</sub>) δ 8.75 (s, 1H), 7.28 – 7.08 (m, 6H), 7.07 – 7.03 (m, 2H), 6.98 (dt,  $J = 8.0, 1.1$  Hz, 2H), 4.42 (q,  $J = 7.1$  Hz, 2H), 3.89 (q,  $J = 7.2$  Hz, 2H), 1.38 (t,  $J = 7.2$  Hz, 3H), 0.86 (t,  $J = 7.2$  Hz, 3H). **<sup>13</sup>C NMR** (101 MHz, CDCl<sub>3</sub>) δ 166.0, 165.9, 158.8, 147.6, 139.0, 137.6, 132.9, 130.6 (2C), 129.1 (2C), 128.85, 128.81 (2C), 128.76, 127.7 (2C), 114.9, 112.0, 62.5, 61.5, 14.1, 13.6. **IR** (mineral oil), cm<sup>-1</sup>: 3215, 1722, 1645, 1615, 1592, 1551, 1489. HRMS (ESI):  $m/z$  calcd for C<sub>23</sub>H<sub>21</sub>NO<sub>6</sub>: 408.1442 [M+H]<sup>+</sup>; found: 408.1440.

**Diethyl 5-((*tert*-butoxycarbonyl)oxy)-6-oxo-1,2-diphenyl-1,6-dihydropyridine-3,4-dicarboxylate (5aa-Boc)**

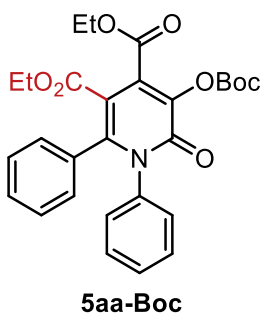

According to **GP B** from pyrrole-2,3-dione **4a** (0.3 mmol scale) and sulfonium salt **2a**. The product was converted to the *O*-Boc derivative and purified by flash column chromatography (Hexanes/EtOAc 5/1.5). Off-white powder (107 mg, 70%). mp 150–152 °C,  $R_f = 0.55$  (PhMe/EtOAc 5/1).

**<sup>1</sup>H NMR** (400 MHz, CDCl<sub>3</sub>) δ 7.24 – 7.10 (m, 6H), 7.05 – 7.00 (m, 2H), 6.98 – 6.93 (m, 2H), 4.41 (q,  $J = 7.1$  Hz, 2H), 3.87 (q,  $J = 7.1$  Hz, 2H), 1.54 (s, 9H), 1.38 (t,  $J = 7.1$  Hz, 3H), 0.82 (t,  $J = 7.2$  Hz, 3H). **<sup>13</sup>C NMR** (101 MHz, CDCl<sub>3</sub>) δ 164.7, 163.6, 157.7, 149.8, 149.0, 138.1, 137.5, 133.5, 133.4, 129.7 (2C), 129.1 (2C), 129.0 (2C), 128.95, 128.7, 127.8 (2C), 109.6, 84.6, 62.4, 61.5, 27.8 (3C), 14.2, 13.5. **IR** (mineral oil), cm<sup>-1</sup>: 1768, 1737, 1677, 1621, 1592, 1544. Anal. Calcd for C<sub>28</sub>H<sub>29</sub>NO<sub>8</sub>: C 66.26; H 5.76; N 2.76. Found: C 65.90; H 5.99; N 2.71.

### Diethyl 1-benzyl-5-((*tert*-butoxycarbonyl)oxy)-6-oxo-2-phenyl-1,6-dihydropyridine-3,4-dicarboxylate (5ba-Boc)

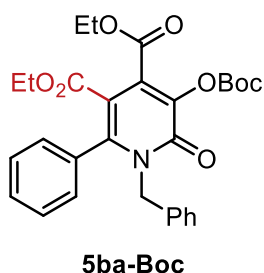

According to **GP B** from pyrrole-2,3-dione **4b** (0.3 mmol scale) and sulfonium salt **2a**. The product was converted to the *O*-Boc derivative and purified by flash column chromatography (Hexanes/EtOAc 5/1.5). Pale-yellow oil (135 mg, 86%).  $R_f$  = 0.25 (Hexanes/EtOAc 5/1).

**$^1\text{H NMR}$**  (400 MHz,  $\text{CDCl}_3$ )  $\delta$  7.40 (t,  $J$  = 7.5 Hz, 1H), 7.29 (t,  $J$  = 7.8 Hz, 2H), 7.17 (dd,  $J$  = 5.1, 2.0 Hz, 3H), 7.00 (d,  $J$  = 6.8 Hz, 2H), 6.84 – 6.72 (m, 2H), 5.09 (s, 2H), 4.39 (q,  $J$  = 7.1 Hz, 2H), 3.82 (q,  $J$  = 7.1 Hz, 2H), 1.57 (s, 9H), 1.37 (t,  $J$  = 7.1 Hz, 3H), 0.80 (t,  $J$  = 7.1 Hz, 3H).  **$^{13}\text{C NMR}$**  (101 MHz,  $\text{CDCl}_3$ )  $\delta$  164.5, 163.6, 158.0, 149.8, 149.0, 137.9, 136.0, 133.1, 132.9, 129.8, 129.1 (2C), 128.6 (2C), 128.2 (2C), 127.6, 127.0 (2C), 110.1, 84.7, 62.4, 61.5, 50.0, 27.8 (3C), 14.2, 13.5. **IR** ( $\text{CHCl}_3$ ),  $\text{cm}^{-1}$ : 1769, 1738, 1669, 1617, 1542, 1496, 1475. Anal. Calcd for  $\text{C}_{29}\text{H}_{31}\text{NO}_8$ : C 66.78; H 5.99; N 2.69. Found: C 66.88; H 6.22; N 2.74.

### Diethyl 1-benzyl-5-((*tert*-butoxycarbonyl)oxy)-2-(4-methoxyphenyl)-6-oxo-1,6-dihydropyridine-3,4-dicarboxylate (5ca-Boc)

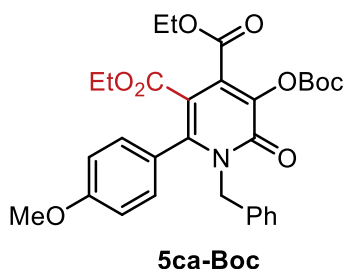

According to **GP B** from pyrrole-2,3-dione **4c** (0.3 mmol scale) and sulfonium salt **2a**. The product was converted to the *O*-Boc derivative and purified by flash column chromatography (Hexanes/EtOAc 5/1.5). Pale-beige powder (152 mg, 92%). mp 138–140 °C,  $R_f$  = 0.26 (Hexanes/EtOAc 5/1.5).

**$^1\text{H NMR}$**  (400 MHz,  $\text{CDCl}_3$ )  $\delta$  7.22 – 7.13 (m, 3H), 6.91 (d,  $J$  = 8.4 Hz, 2H), 6.86 – 6.74 (m, 4H), 5.10 (s, 2H), 4.37 (q,  $J$  = 7.2 Hz, 2H), 3.86 (q,  $J$  = 7.2 Hz, 2H), 3.81 (s, 3H), 1.56 (s, 9H), 1.36 (t,  $J$  = 7.1 Hz, 3H), 0.87 (t,  $J$  = 7.1 Hz, 3H).  **$^{13}\text{C NMR}$**  (101 MHz,  $\text{CDCl}_3$ )  $\delta$  164.7, 163.6, 160.7, 158.0, 149.8, 148.8, 137.8, 136.1, 132.9, 130.5 (2C), 128.5 (2C), 127.5, 127.0 (2C), 125.0, 113.7 (2C), 110.5, 84.6, 62.4, 61.5, 55.5, 49.9, 27.8 (3C), 14.1, 13.6. **IR** (mineral oil),  $\text{cm}^{-1}$ : 1773, 1748, 1733, 1679, 1609, 1543, 1506. Anal. Calcd for  $\text{C}_{30}\text{H}_{33}\text{NO}_9$ : C 65.33; H 6.03; N 2.54. Found: C 65.65; H 6.18; N 2.59.

### Diethyl 1-benzyl-5-((*tert*-butoxycarbonyl)oxy)-2-(4-nitrophenyl)-6-oxo-1,6-dihydropyridine-3,4-dicarboxylate (5da-Boc)

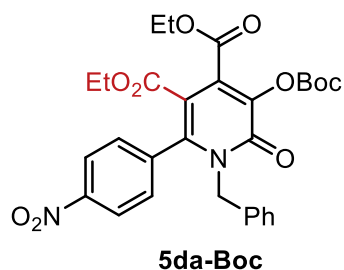

According to **GP B** from pyrrole-2,3-dione **4d** (0.3 mmol scale) and sulfonium salt **2a**. The product was converted to the *O*-Boc derivative and purified by flash column chromatography (Hexanes/EtOAc 5/1.5). Pale-yellow powder (148 mg, 87%). mp 144–146 °C,  $R_f$  = 0.32 (Hexanes/EtOAc 5/1.5).

**$^1\text{H NMR}$**  (400 MHz,  $\text{CDCl}_3$ )  $\delta$  8.13 (d,  $J$  = 9.0 Hz, 2H), 7.24 – 7.13 (m, 5H), 6.84 – 6.66 (m, 2H), 5.06 (s, 2H), 4.40 (q,  $J$  = 7.2 Hz, 2H), 3.87 (q,  $J$  = 7.1 Hz, 2H), 1.58 (d,  $J$  = 0.8 Hz, 9H), 1.38 (t,  $J$  = 7.1 Hz, 3H), 0.88 (t,  $J$  = 7.1 Hz, 3H).  **$^{13}\text{C NMR}$**  (101 MHz,  $\text{CDCl}_3$ )  $\delta$  163.6, 163.3, 157.7, 149.7, 148.6, 146.9, 138.9, 138.4, 135.4, 133.2, 130.4 (2C), 128.9 (2C), 128.1, 126.7 (2C), 123.3 (2C), 109.6, 85.0, 62.6, 61.9, 50.0, 27.8 (3C), 14.2, 13.6. **IR** (mineral oil),  $\text{cm}^{-1}$ : 1765, 1736, 1668, 1614, 1603, 1542. Anal. Calcd for  $\text{C}_{29}\text{H}_{30}\text{N}_2\text{O}_{10}$ : C 61.48; H 5.34; N 4.94. Found: C 61.59; H 5.46; N 5.10.

Diethyl  
(5*ea*-Boc)

**1-benzyl-5-((tert-butoxycarbonyl)oxy)-2-(furan-2-yl)-6-oxo-1,6-dihydropyridine-3,4-dicarboxylate**

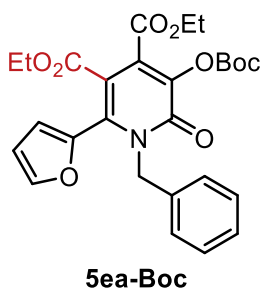

According to **GP B** from pyrrole-2,3-dione **4e** (0.3 mmol scale) and sulfonium salt **2a**. The product was converted to the *O*-Boc derivative and purified by flash column chromatography (Hexanes/EtOAc 5/1.5). Pale oil (144 mg, 94%).  $R_f = 0.25$  (Hexanes/EtOAc 5/1.5).

$^1\text{H NMR}$  (400 MHz,  $\text{CDCl}_3$ )  $\delta$  7.51 (dd,  $J = 1.8, 0.8$  Hz, 1H), 7.25 – 7.16 (m, 3H), 7.05 – 6.90 (m, 2H), 6.41 (dd,  $J = 3.4, 1.8$  Hz, 1H), 6.25 (d,  $J = 3.4$  Hz, 1H), 5.17 (s, 2H), 4.37 (q,  $J = 7.1$  Hz, 2H), 4.00 (q,  $J = 7.1$  Hz, 2H), 1.55 (s, 9H), 1.35 (t,  $J = 7.1$  Hz, 3H), 1.05 (t,  $J = 7.1$  Hz, 3H).  $^{13}\text{C NMR}$  (101 MHz,  $\text{CDCl}_3$ )  $\delta$  164.4, 163.1, 157.7, 149.5, 144.0, 143.5, 139.4, 137.9, 135.9, 132.5, 128.6 (2C), 127.7, 127.0 (2C), 114.1, 113.0, 111.4, 84.8, 62.5, 61.9, 50.0, 27.7 (3C), 14.1, 13.9. **IR** ( $\text{CHCl}_3$ ),  $\text{cm}^{-1}$ : 1770, 1738, 1672, 1620, 1535. Anal. Calcd for  $\text{C}_{27}\text{H}_{29}\text{NO}_9$ : C 63.40; H 5.71; N 2.74. Found: C 63.80; H 5.55; N 2.67.

**Ethyl 4-benzoyl-5-hydroxy-6-oxo-2-phenyl-1-(*p*-tolyl)-1,6-dihydropyridine-3-carboxylate (5fa)**

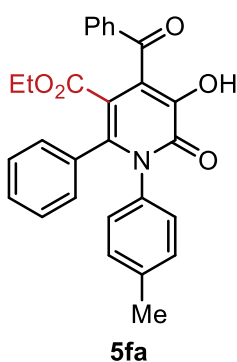

According to **GP B** from pyrrole-2,3-dione **4f** (2.0 mmol scale) and sulfonium salt **2a**. Isolation by crystallization from MeCN/ $\text{H}_2\text{O}$  gave an off-white powder (705 mg, 78%). mp 216–218 °C,  $R_f = 0.3$  (PhMe/EtOAc 5/1).

$^1\text{H NMR}$  (400 MHz,  $\text{CDCl}_3$ )  $\delta$  8.10 – 7.96 (m, 2H), 7.67 – 7.57 (m, 1H), 7.52 (t,  $J = 7.6$  Hz, 2H), 7.22 – 7.00 (m, 7H), 6.92 (t,  $J = 8.4$  Hz, 3H), 3.72 (q,  $J = 7.2$  Hz, 2H), 2.26 (s, 3H), 0.66 (t,  $J = 7.1$  Hz, 3H).  $^{13}\text{C NMR}$  (101 MHz,  $\text{CDCl}_3$ )  $\delta$  192.9, 165.2, 159.4, 142.2, 141.9, 138.8, 136.7, 134.9, 133.8, 133.4, 130.3 (2C), 129.8 (2C), 129.7 (2C), 128.8 (2C), 128.7, 128.4 (2C), 127.7 (2C), 124.5, 112.5, 61.4, 21.2, 13.2. **IR** (mineral oil),  $\text{cm}^{-1}$ : 3192, 1720, 1700, 1667, 1639, 1615, 1596, 1580, 1548, 1507, 1489. HRMS (ESI):  $m/z$  calcd for  $\text{C}_{28}\text{H}_{23}\text{NO}_5$ : 454.1649 [M+H] $^+$ ; found: 454.1646.

**Ethyl 5-benzoyl-3-hydroxy-2-oxo-1,6-diphenyl-1,2-dihydropyridine-4-carboxylate (5ab)**

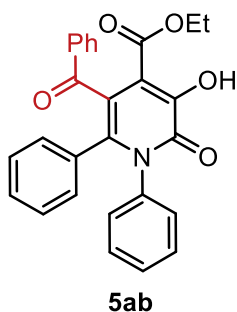

According to **GP B** from pyrrole-2,3-dione **4a** (1.0 mmol scale) and sulfonium salt **2b**. Isolation by crystallization from MeCN/ $\text{H}_2\text{O}$  gave a pale-beige powder (195 mg, 44%). mp 198–200 °C,  $R_f = 0.15$  (PhMe/EtOAc 5/1).

$^1\text{H NMR}$  (400 MHz,  $\text{CDCl}_3$ )  $\delta$  9.71 (s, 1H), 7.65 (d,  $J = 6.9$  Hz, 2H), 7.40 (t,  $J = 7.4$  Hz, 1H), 7.27 (t,  $J = 7.7$  Hz, 2H), 7.24 – 7.12 (m, 3H), 7.02 (d,  $J = 7.0$  Hz, 2H), 6.94 – 6.81 (m, 5H), 4.11 (q,  $J = 7.1$  Hz, 2H), 0.94 (t,  $J = 7.2$  Hz, 3H).  $^{13}\text{C NMR}$  (101 MHz,  $\text{CDCl}_3$ )  $\delta$  193.7, 166.6, 158.5, 149.9, 138.3, 137.6, 137.0, 132.9, 131.9, 131.2 (2C), 129.1 (2C), 129.0 (2C), 128.9 (2C), 128.6, 128.6, 128.3 (2C), 127.5 (2C), 117.3, 114.2, 62.5, 13.3. **IR** (mineral oil),  $\text{cm}^{-1}$ : 3185, 1744, 1658, 1644, 1593, 1578, 1545. HRMS (ESI):  $m/z$  calcd for  $\text{C}_{27}\text{H}_{21}\text{NO}_5$ : 462.1312 [M+Na] $^+$ ; found: 462.1314.

**(5-Hydroxy-6-oxo-2-phenyl-1-(*p*-tolyl)-1,6-dihydropyridine-3,4-diyl)bis(phenylmethanone) (5fb)**

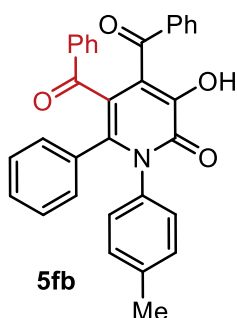

According to **GP B** from pyrrole-2,3-dione **4f** (0.3 mmol scale) and sulfonium salt **2b**. Isolation by crystallization from EtOH gave an off-white powder (93 mg, 64%). mp 258–260 °C,  $R_f = 0.28$  (PhMe/EtOAc 5/1).

$^1\text{H NMR}$  (400 MHz,  $\text{CDCl}_3$ )  $\delta$  8.00 (d,  $J = 7.1$  Hz, 2H), 7.60 (t,  $J = 7.4$  Hz, 1H), 7.57 – 7.41 (m, 4H), 7.31 – 7.20 (m, 1H), 7.15 – 7.09 (m, 3H), 7.06 (d,  $J = 8.1$  Hz, 2H), 6.97 (d,  $J = 8.3$  Hz, 2H), 6.93 – 6.82 (m, 5H), 2.26 (s, 3H).  $^{13}\text{C NMR}$  (101 MHz,  $\text{CDCl}_3$ )  $\delta$  195.2, 193.3, 159.6, 142.7, 138.9, 138.9, 138.5, 136.8, 134.8, 134.0, 132.6, 132.3, 131.3 (2C), 130.0 (2C), 129.9 (2C), 129.4 (2C), 128.7, 128.67 (2C), 128.4 (2C), 127.9 (2C), 127.7 (2C), 124.9, 120.2, 21.2. **IR** (mineral oil),  $\text{cm}^{-1}$ : 3228, 1670, 1639, 1615,

1593, 1578, 1510. HRMS (ESI):  $m/z$  calcd for  $C_{32}H_{23}NO_4$ : 486.1700  $[M+H]^+$ ; found: 486.1702.

***tert*-Butyl (4,5-dibenzoyl-2-oxo-6-phenyl-1-(*p*-tolyl)-1,2-dihydropyridin-3-yl) carbonate (5fb-Boc)**

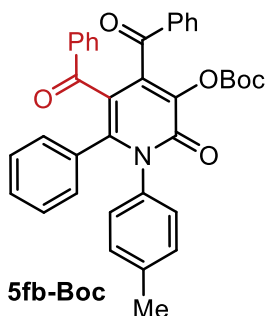

According to **GP B** from pyrrole-2,3-dione **4f** (0.3 mmol scale) and sulfonium salt **2b**. The product was converted to the *O*-Boc derivative and purified by flash column chromatography (Hexanes/EtOAc 5/2). Off-white foam (100 mg, 57%). mp 256–257 °C,  $R_f$  = 0.55 (PhMe/EtOAc 5/1).

$^1H$  NMR (400 MHz,  $CDCl_3$ )  $\delta$  8.10 – 8.00 (m, 2H), 7.57 (t,  $J$  = 7.4 Hz, 1H), 7.50 – 7.43 (m, 4H), 7.22 (t,  $J$  = 7.4 Hz, 1H), 7.09 (t,  $J$  = 7.7 Hz, 2H), 7.02 (d,  $J$  = 8.3 Hz, 2H), 6.97 (d,  $J$  = 8.6 Hz, 2H), 6.90 – 6.79 (m, 5H), 2.22 (s, 3H), 1.33 (s, 9H).  $^{13}C$  NMR (101 MHz,  $CDCl_3$ )  $\delta$  194.7, 192.3, 157.6, 149.3, 147.0, 139.6, 138.7, 138.4, 137.5, 136.4, 134.8, 134.1, 132.6, 132.4, 130.7 (2C), 129.9 (2C), 129.7 (2C), 129.3 (2C), 129.0, 128.7 (2C), 128.6 (2C), 127.8 (2C), 127.7 (2C), 118.0, 84.3, 27.6 (3C), 21.2. IR (mineral oil),  $cm^{-1}$ : 1768, 1675, 1615, 1597, 1580, 1532. Anal. Calcd for  $C_{37}H_{31}NO_6$ : C 75.88; H 5.34; N 2.39. Found: C 76.24; H 5.28; N 2.47.

**Ethyl 3-((*tert*-butoxycarbonyl)oxy)-5-(furan-2-carbonyl)-2-oxo-1,6-diphenyl-1,2-dihydropyridine-4-carboxylate (5ac-Boc)**

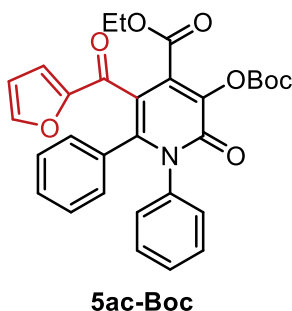

According to **GP B** from pyrrole-2,3-dione **4a** (0.3 mmol scale) and sulfonium salt **2c**. The product was converted to the *O*-Boc derivative and purified by flash column chromatography (Hexanes/EtOAc 5/3). Pale-beige powder (78 mg, 49%). mp 162–164 °C,  $R_f$  = 0.38 (PhMe/EtOAc 5/1).

$^1H$  NMR (400 MHz,  $CDCl_3$ )  $\delta$  7.38 (dd,  $J$  = 1.8, 0.8 Hz, 1H), 7.24 – 7.13 (m, 3H), 7.10 – 6.92 (m, 7H), 6.90 (dd,  $J$  = 3.6, 0.8 Hz, 1H), 6.31 (dd,  $J$  = 3.6, 1.7 Hz, 1H), 4.21 (q,  $J$  = 7.2 Hz, 2H), 1.55 (s, 9H), 1.19 (t,  $J$  = 7.1 Hz, 3H).  $^{13}C$  NMR (101 MHz,  $CDCl_3$ )  $\delta$  180.1, 163.0, 157.8, 152.9, 149.8, 146.7, 146.4, 139.0, 137.4, 132.5, 132.0, 130.3 (2C), 129.1, 129.03 (2C), 129.0 (2C), 128.7, 127.7 (2C), 119.0, 115.7, 112.5, 84.5, 62.5, 27.8 (3C), 13.8. IR (mineral oil),  $cm^{-1}$ : 1776, 1737, 1673, 1641, 1563, 1542. Anal. Calcd for  $C_{30}H_{27}NO_8$ : C 68.05; H 5.14; N 2.65. Found: C 68.38; H 5.37; N 2.88.

**Ethyl 3-hydroxy-2-oxo-1,6-diphenyl-5-(3-phenyl-1,2,4-oxadiazol-5-yl)-1,2-dihydropyridine-4-carboxylate (5ae)**

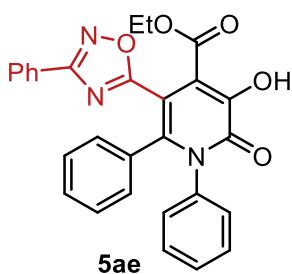

According to **GP B** from pyrrole-2,3-dione **4a** (0.3 mmol scale) and sulfonium salt **2e**. Isolation by crystallization from EtOH/H<sub>2</sub>O gave an off-white powder (94 mg, 65%). mp 172–174 °C,  $R_f$  = 0.12 (PhMe/EtOAc 5/1).

$^1H$  NMR (400 MHz,  $CDCl_3$ )  $\delta$  9.88 (s, 1H), 7.91 (d,  $J$  = 6.6 Hz, 2H), 7.55 – 7.35 (m, 3H), 7.32 – 7.13 (m, 3H), 7.05 (d,  $J$  = 5.5 Hz, 7H), 4.22 (q,  $J$  = 7.2 Hz, 2H), 1.06 (t,  $J$  = 7.1 Hz, 3H).  $^{13}C$  NMR (101 MHz,  $CDCl_3$ )  $\delta$  173.8, 168.2, 166.5, 158.5, 150.3, 141.7, 137.5, 131.9, 131.3, 130.4 (2C), 129.2 (2C), 129.18, 129.0 (2C), 128.9, 128.8 (2C), 127.8 (2C), 127.4 (2C), 126.8, 114.2, 102.2, 62.8, 13.7. IR (mineral oil),  $cm^{-1}$ : 3268, 3186, 1744, 1655, 1630, 1594, 1574, 1559. Anal. Calcd for  $C_{28}H_{21}N_3O_5$ : C 70.14; H 4.41; N 8.76. Found: C 70.48; H 4.20; N 8.91.

**Ethyl (E)-3-((*tert*-butoxycarbonyl)oxy)-5-(3-methoxy-3-oxoprop-1-en-1-yl)-2-oxo-1,6-diphenyl-1,2-dihydropyridine-4-carboxylate (5af-Boc)**



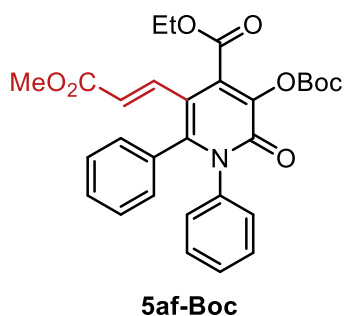

According to **GP B** from pyrrole-2,3-dione **4a** (0.3 mmol scale) and sulfonium salt **2f**. The product was converted to the *O*-Boc derivative and purified by flash column chromatography (Hexanes/EtOAc 5/2). Pale-beige powder (100 mg, 64%). mp 144–146 °C,  $R_f = 0.15$  (Hexanes/EtOAc 5/1.5).

**<sup>1</sup>H NMR** (400 MHz, CDCl<sub>3</sub>) δ 7.23 – 7.12 (m, 6H), 7.07 (d,  $J = 16.3$  Hz, 1H), 7.01 – 6.95 (m, 4H), 5.81 (d,  $J = 16.3$  Hz, 1H), 4.44 (q,  $J = 7.1$  Hz, 2H), 3.62 (s, 3H), 1.54 (s, 9H), 1.39 (t,  $J = 7.2$  Hz, 3H). **<sup>13</sup>C NMR** (101 MHz, CDCl<sub>3</sub>) δ 166.6, 164.1, 157.1, 149.9, 148.5, 139.0, 138.2, 137.7, 134.1, 132.4, 130.2 (2C), 129.4, 129.0 (2C), 128.9 (2C), 128.6, 128.4 (2C), 120.3, 109.4, 84.7, 62.7, 51.7, 27.7 (3C), 14.1. **IR** (mineral oil), cm<sup>-1</sup>: 1769, 1737, 1711, 1679, 1625, 1609, 1521. Anal. Calcd for C<sub>29</sub>H<sub>29</sub>NO<sub>8</sub>: C 67.04; H 5.63; N 2.70. Found: C 67.26; H 5.65; N 2.81.

#### Diethyl 5-hydroxy-6-oxo-2-phenyl-1,6-dihydropyridine-3,4-dicarboxylate (**5ga**)

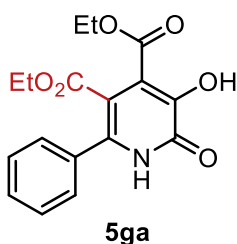

According to **GP B** from pyrrole-2,3-dione **4g** (0.3 mmol scale) and sulfonium salt **2a**. The reaction mixture was poured into 30 mL of water and formed precipitate was filtered off. White powder (59 mg, 88%). mp 200–202 °C,  $R_f = 0.35$  (PhMe/EtOAc 1/1).

**<sup>1</sup>H NMR** (400 MHz, CDCl<sub>3</sub>) δ 10.92 (s, 1H), 8.80 (s, 1H), 7.64 – 7.23 (m, 5H), 4.39 (q,  $J = 7.1$  Hz, 2H), 4.01 (q,  $J = 7.1$  Hz, 2H), 1.36 (t,  $J = 7.1$  Hz, 3H), 0.96 (t,  $J = 7.1$  Hz, 3H). **<sup>13</sup>C NMR** (101 MHz, CDCl<sub>3</sub>) δ 166.0, 165.6, 158.7, 146.9, 137.0, 133.1, 130.0, 128.8 (2C), 128.5 (2C), 118.3, 110.9, 62.5, 61.6, 14.1, 13.6. **IR** (mineral oil), cm<sup>-1</sup>: 3150, 1742, 1717, 1642, 1620, 1599. Anal. Calcd for C<sub>17</sub>H<sub>17</sub>NO<sub>6</sub>: C 61.63; H 5.17; N 4.23. Found: C 61.86; H 5.21; N 4.02.

#### Ethyl 5-benzoyl-3-hydroxy-2-oxo-6-phenyl-1,2-dihydropyridine-4-carboxylate (**5gb**)

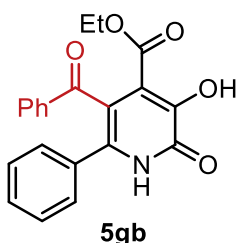

According to **GP B** from pyrrole-2,3-dione **4g** (0.3 mmol scale) and sulfonium salt **2b**. Isolation by crystallization from EtOH gave a white powder (70 mg, 64%). mp 225–227 °C,  $R_f = 0.3$  (PhMe/EtOAc 1/1).

**<sup>1</sup>H NMR** (400 MHz, CDCl<sub>3</sub>) δ 11.10 (s, 1H), 9.72 (s, 1H), 7.66 (d,  $J = 7.0$  Hz, 2H), 7.40 (t,  $J = 7.4$  Hz, 1H), 7.31 – 7.17 (m, 7H), 4.09 (q,  $J = 7.1$  Hz, 2H), 0.94 (t,  $J = 7.1$  Hz, 3H). **<sup>13</sup>C NMR** (101 MHz, CDCl<sub>3</sub>) δ 193.6, 166.7, 158.7, 149.3, 137.8, 135.0, 133.2, 132.3, 129.9, 129.3 (2C), 129.0 (2C), 128.8 (2C), 128.5 (2C), 117.3, 116.6, 62.6, 13.3. **IR** (mineral oil), cm<sup>-1</sup>: 3144, 1744, 1717, 1659, 1634, 1597. Anal. Calcd for C<sub>21</sub>H<sub>17</sub>NO<sub>5</sub>: C 69.41; H 4.72; N 3.85. Found: C 69.58; H 4.96; N 3.92.

#### Ethyl 4-cyano-5-hydroxy-6-oxo-2-phenyl-1,6-dihydropyridine-3-carboxylate (**5ha**)

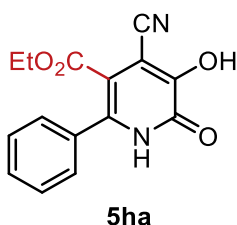

According to **GP B** from pyrrole-2,3-dione **4h** (0.3 mmol scale) and sulfonium salt **2a**. The reaction mixture was poured into 30 mL of water and formed precipitate was filtered off. Yellow powder (57 mg, 40%). mp 232–234 °C,  $R_f = 0.13$  (EtOAc).

**<sup>1</sup>H NMR** (400 MHz, DMSO) δ 12.55 (s, 1H), 11.79 (s, 1H), 7.51 – 7.41 (m, 3H), 7.40 – 7.27 (m, 2H), 3.94 (q,  $J = 7.1$  Hz, 2H), 0.84 (t,  $J = 7.1$  Hz, 3H). **<sup>13</sup>C NMR** (101 MHz, DMSO) δ 164.0, 157.0, 153.5, 139.6, 133.2, 129.2, 128.6 (2C), 128.0 (2C), 113.5, 107.2, 97.5, 60.9, 13.0. **IR** (mineral oil), cm<sup>-1</sup>: 3264, 3184, 2233, 1726, 1659. Anal. Calcd for C<sub>15</sub>H<sub>12</sub>N<sub>2</sub>O<sub>4</sub>: C 63.38; H 4.26; N 9.85. Found: C 63.38; H 4.15; N 9.98.

### 3-Ethyl 2-methyl 4-benzoyl-5-hydroxy-6-oxo-1-phenyl-1,6-dihydropyridine-2,3-dicarboxylate (6aa)

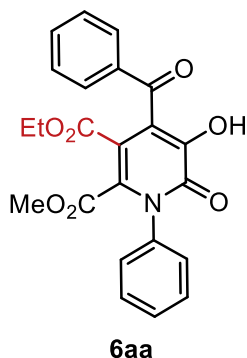

According to **GP C** from cyclopropane **3aa** (0.3 mmol scale). Isolation by recrystallization from MTBE/DCM gave an off-white powder, 102 mg (81%), mp 180–182 °C,  $R_f$  = 0.23 (PhMe/EtOAc 5/1).

Thermal method: a test tube containing 0.3 mmol of **3aa** is placed in an oil bath preheated to 180 °C and stirred for 1 h. The test tube is cooled to room temperature and the residue is crystallized from MTBE/DCM. Off-white powder, 88 mg (70%).

**<sup>1</sup>H NMR** (400 MHz, CDCl<sub>3</sub>) δ 7.97 (d,  $J$  = 7.1 Hz, 2H), 7.62 (t,  $J$  = 7.4 Hz, 1H), 7.57 – 7.45 (m, 5H), 7.34 (dd,  $J$  = 6.6, 3.0 Hz, 2H), 6.89 (s, 1H), 4.03 (q,  $J$  = 7.1 Hz, 2H), 3.49 (s, 3H), 0.92 (t,  $J$  = 7.1 Hz, 3H). **<sup>13</sup>C NMR** (101 MHz, CDCl<sub>3</sub>) δ 191.6, 163.1, 162.0, 158.4, 143.0, 136.7, 136.5, 136.2, 134.0, 130.3, 129.6 (2C), 129.4 (2C), 128.9 (2C), 128.2 (2C), 124.5, 108.6, 62.3, 53.0, 13.3. **IR** (mineral oil), cm<sup>-1</sup>: 3368, 1737, 1713, 1680, 1646, 1596, 1513. Anal. Calcd for C<sub>23</sub>H<sub>19</sub>NO<sub>7</sub>: C 65.56; H 4.54; N 3.32. Found: C 65.78; H 4.70; N 3.45.

### 3-Ethyl 2-methyl 5-hydroxy-6-oxo-1-phenyl-4-(thiophene-2-carbonyl)-1,6-dihydropyridine-2,3-dicarboxylate (6ea)

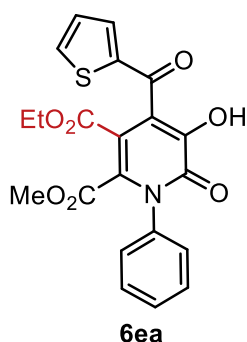

According to **GP C** from cyclopropane **3ea** (0.3 mmol scale). Isolation by recrystallization from EtOH gave an off-white powder, 97 mg (76%), mp 170–172 °C,  $R_f$  = 0.22 (PhMe/EtOAc 5/1).

**<sup>1</sup>H NMR** (400 MHz, CDCl<sub>3</sub>) δ 7.75 (dd,  $J$  = 4.9, 1.2 Hz, 1H), 7.64 (dd,  $J$  = 3.8, 1.2 Hz, 1H), 7.56 – 7.47 (m, 3H), 7.40 – 7.29 (m, 2H), 7.16 (dd,  $J$  = 4.9, 3.8 Hz, 1H), 6.99 (s, 1H), 4.08 (q,  $J$  = 7.1 Hz, 2H), 3.48 (s, 3H), 1.02 (t,  $J$  = 7.2 Hz, 3H). **<sup>13</sup>C NMR** (101 MHz, CDCl<sub>3</sub>) δ 183.4, 163.0, 162.0, 158.5, 143.8, 143.3, 136.6, 136.2, 135.1, 134.6, 130.3, 129.6 (2C), 128.4, 128.2 (2C), 123.9, 108.5, 62.4, 53.1, 13.4. **IR** (mineral oil), cm<sup>-1</sup>: 3296, 1751, 1715, 1657, 1643, 1612, 1594, 1541. Anal. Calcd for C<sub>21</sub>H<sub>17</sub>NO<sub>7</sub>S: C 59.01; H 4.01; N 3.28; S 7.50. Found: C 59.32; H 4.07; N 3.48; S 7.63.

### Ethyl 5-hydroxy-1-(4-methoxyphenyl)-2,4-bis(4-methylbenzoyl)-6-oxo-1,6-dihydropyridine-3-carboxylate (6ga)

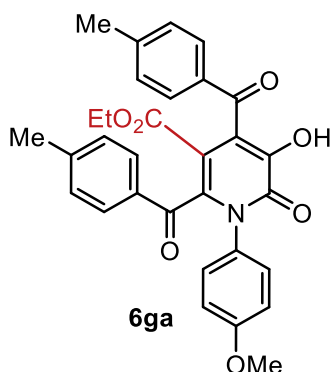

According to **GP C** from cyclopropane **3ga** (0.3 mmol scale). Isolation by recrystallization from EtOH gave an off-white powder, 133 mg (84%), mp 218–220 °C,  $R_f$  = 0.31 (PhMe/EtOAc 5/1).

**<sup>1</sup>H NMR** (400 MHz, CDCl<sub>3</sub>) δ 7.91 (d,  $J$  = 8.1 Hz, 2H), 7.54 (d,  $J$  = 8.1 Hz, 2H), 7.32 (d,  $J$  = 8.0 Hz, 2H), 7.16 (d,  $J$  = 8.0 Hz, 2H), 7.12 – 6.46 (br. m, 4H), 6.82 (s, 1H), 3.84 (q,  $J$  = 7.1 Hz, 2H), 3.74 (s, 3H), 2.45 (s, 3H), 2.38 (s, 3H), 0.71 (t,  $J$  = 7.1 Hz, 3H). **<sup>13</sup>C NMR** (101 MHz, CDCl<sub>3</sub>) δ 191.7, 188.2, 163.3, 160.3, 159.3, 145.2, 144.9, 142.4, 142.3, 134.2, 134.2, 130.1 (2C), 129.6 (2C), 129.6 (2C), 129.5 (2C), 129.1 (2C), 128.1, 125.1, 114.5 (2C), 108.7, 62.1, 55.6, 21.9, 21.9, 13.0. **IR** (mineral oil), cm<sup>-1</sup>: 3238, 1710, 1682, 1648, 1605, 1575, 1511. Anal. Calcd for C<sub>31</sub>H<sub>27</sub>NO<sub>7</sub>: C 70.85; H 5.18; N 2.67. Found: C 71.07; H 4.99; N 2.49.

### Ethyl 5-hydroxy-4-(4-methylbenzoyl)-6-oxo-1-phenyl-2-(3-phenyl-1,2,4-oxadiazol-5-yl)-1,6-dihydropyridine-3-carboxylate (6ha)

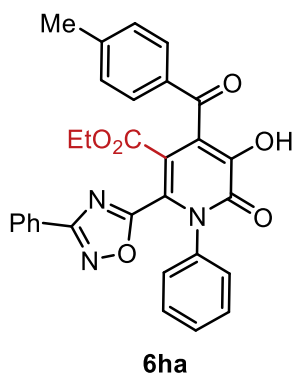

According to **GP C** from cyclopropane **3ha** (0.3 mmol scale). Isolation by recrystallization from EtOH gave an off-white powder, 149 mg (95%), mp 199–201 °C,  $R_f$  = 0.24 (PhMe/EtOAc 5/1).

**<sup>1</sup>H NMR** (400 MHz, CDCl<sub>3</sub>) δ 7.98 – 7.85 (m, 4H), 7.53 – 7.28 (m, 10H), 7.18 (s, 1H), 3.91 (q,  $J$  = 7.1 Hz, 2H), 2.46 (s, 3H), 0.81 (t,  $J$  = 7.1 Hz, 3H). **<sup>13</sup>C NMR** (101 MHz, CDCl<sub>3</sub>) δ 191.0, 169.0, 168.5, 162.6, 158.6, 145.2, 144.9, 136.0, 134.0, 131.6, 130.3, 129.7 (2C), 129.6 (4C), 129.0 (2C), 128.0 (2C), 127.5 (2C), 127.2, 126.1, 124.7, 115.1, 62.5, 22.0, 13.3. **IR** (mineral oil), cm<sup>-1</sup>: 3264, 1724, 1682, 1649, 1623, 1592, 1526. Anal. Calcd for C<sub>30</sub>H<sub>23</sub>N<sub>3</sub>O<sub>6</sub>: C 69.09; H 4.45; N 8.06. Found: C 69.48; H 4.40; N 8.25.

## NMR monitoring of cyclopropanation and ring expansion

NMR monitoring (**Scheme S2**) was performed on the reaction of pyrrole-2,3-dione **4a** with sulfonium salt derived from methyl bromoacetate (for spectra simplification).

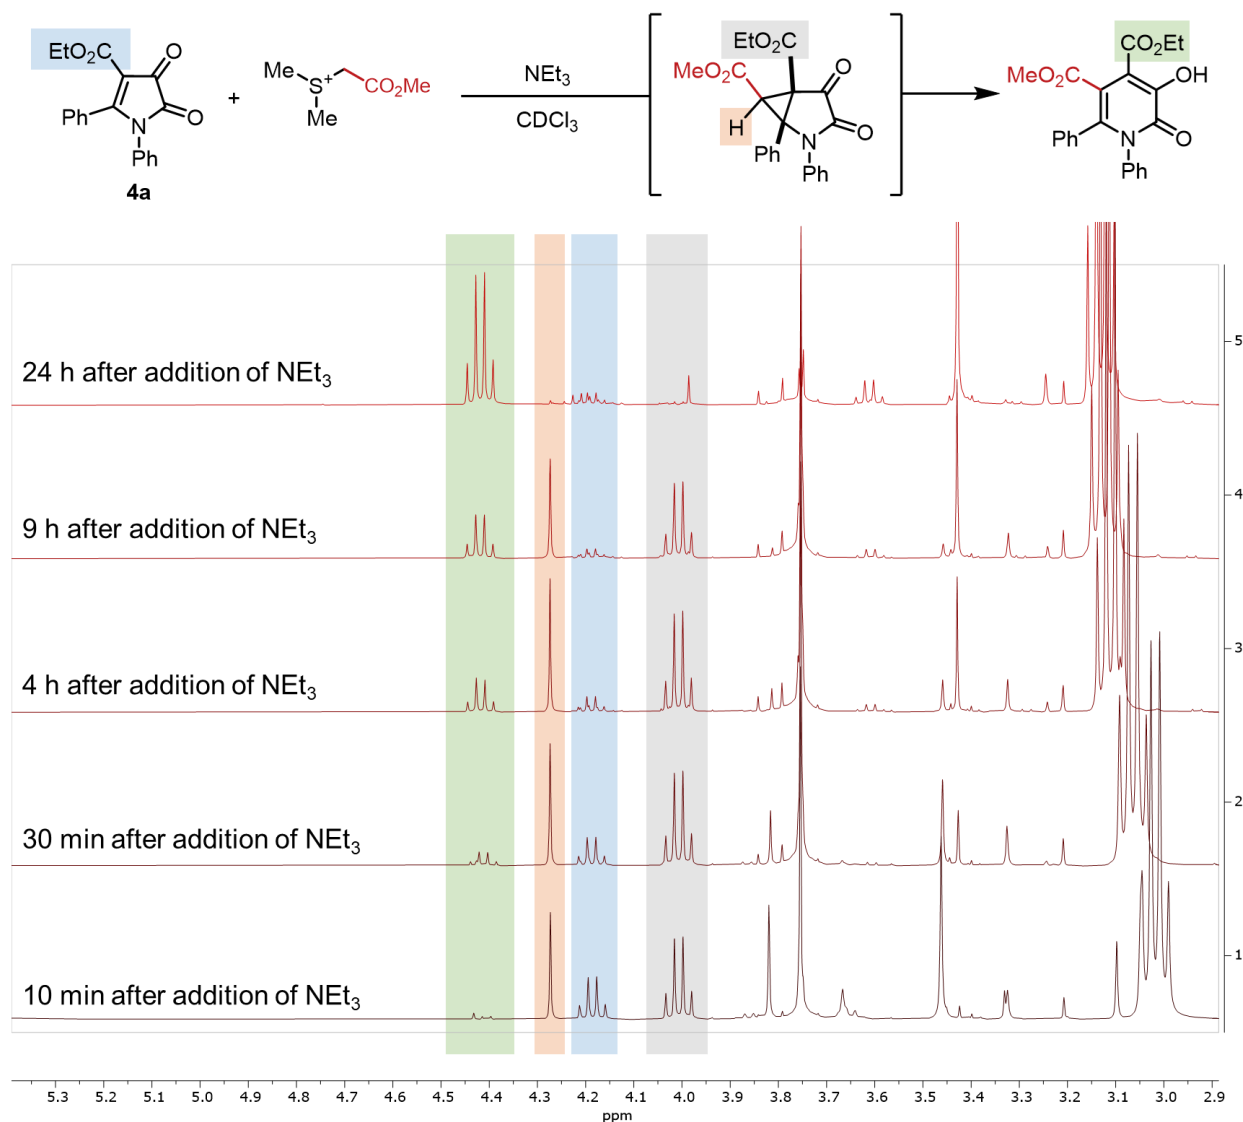

**Scheme S2.** NMR monitoring of the reaction of **4a** and sulfonium ylide in CDCl<sub>3</sub>



## Thermal analysis of cyclopropane 3aa

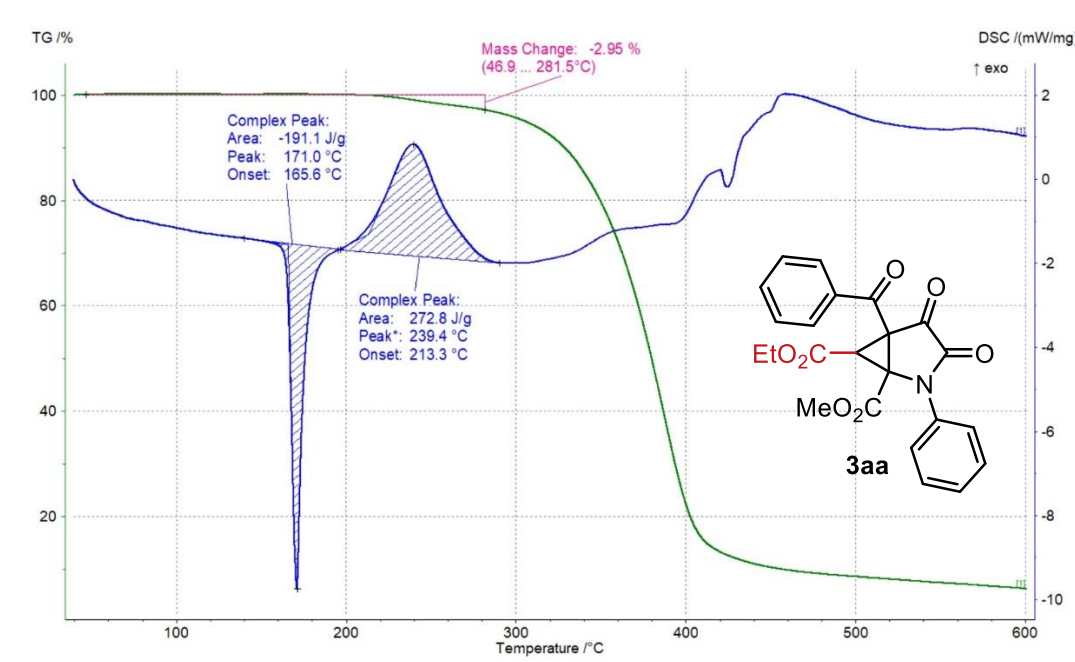

**Figure S2.** Thermal analysis of cyclopropane **3aa** (argon atmosphere)

## Conditions for cyclopropane 3aa ring-opening reaction

The optimization reactions of the ring-opening of cyclopropanes **3** were tested on product **3aa** (0.03 mmol scale) at room temperature (solvents: DCM or HFIP) and monitored by TLC (**Fig. S3**, note: not all conditions are represented) – disappearance of **3aa** ( $R_f$  0.6 PhMe/AcOEt 5/1) and formation of the product **6aa** ( $R_f$  ~0.3 PhMe/AcOEt 5/1 tailing spot). The following catalysts were tested – Lewis acids: Sc(OTf)<sub>3</sub>, Cu(OTf)<sub>2</sub>, Y(OTf)<sub>3</sub>, TiCl<sub>4</sub>, Ni(ClO<sub>4</sub>)<sub>2</sub>·6H<sub>2</sub>O, BF<sub>3</sub>·Et<sub>2</sub>O; Brønsted acids: TfOH, 4N HCl in 1,4-dioxane (as a solvent), AcOH; and bases: DBU, K<sub>2</sub>CO<sub>3</sub>.

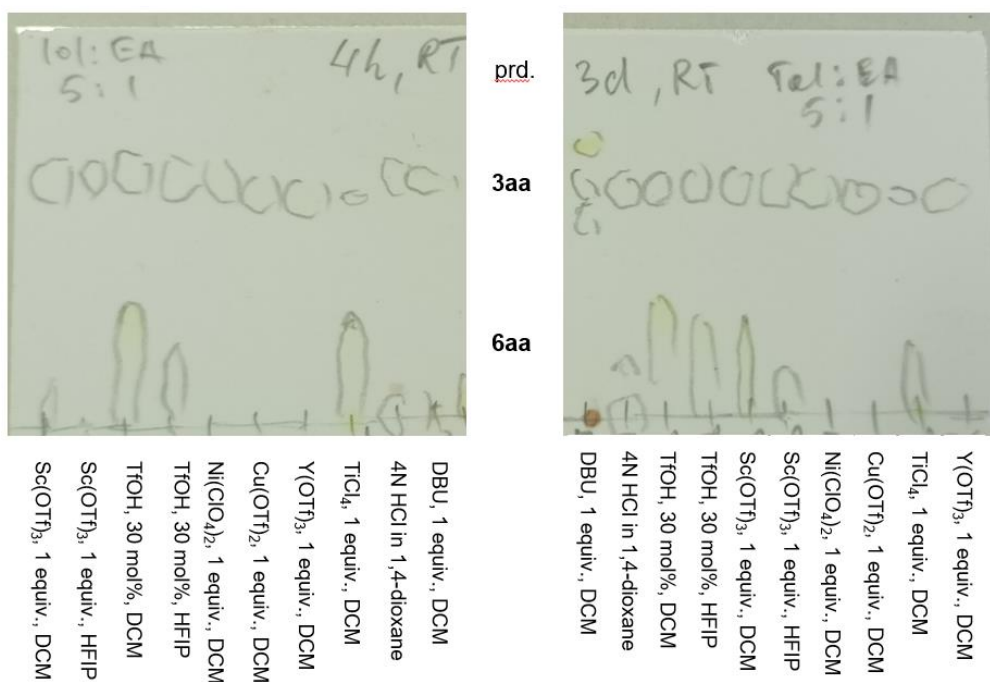

**Figure S3.** TLC of the optimization studies (**3aa**→**6aa**)

## Attempts for an asymmetric synthesis of the cyclopropane 3aa

In order to carry out the asymmetric synthesis of **3aa** (Scheme S3), a number of conditions were tested (Table S1). The reaction of **1aa** with known chiral sulfonium salt **Y1** resulted in the highest ee (50%) among the tested conditions (*note*: the absolute configuration of major enantiomer of **3aa** is not known).

**Procedure for the asymmetric synthesis of 3aa:** to the cooled (dry-ice/acetone bath) DCM (2 mL) solution of pyrrole-2,3-dione **1aa** (1 equiv.) and sulfonium salt **Y1** (1 equiv.) under Ar atmosphere is added the solution of NEt<sub>3</sub> (1.1 equiv.) in 2 mL of DCM dropwise during 5 min. The mixture is stirred for 10 min and then warmed to RT. The solvent is then evaporated under reduced pressure and the residue is purified by flash column chromatography (PhMe/EtOAc 7/1) to afford the cyclopropane **3aa** (loading in the minimum volume of dichloromethane).

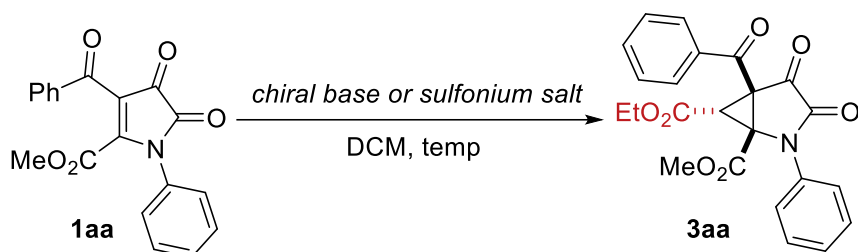

**Scheme S3.** Asymmetric synthesis of the cyclopropane **3aa**

**Table S1**

| Entry | Chiral base / sulfonium salt     | Conditions           | ee, % | Yield, % |
|-------|----------------------------------|----------------------|-------|----------|
| 1     | <b>C1 (commercial) + 2a</b>      | DCM (0.5M), RT       | 0     | 75       |
| 2     | <b>C2 [13] + 2a</b>              | DCM (0.5M), RT       | 0     | 62       |
| 3     | <b>C3 [14] + 2a</b>              | DCM (0.5M), RT       | 0     | 65       |
| 4     | <b>Y1 [15] + Et<sub>3</sub>N</b> | DCM (0.5M), RT       | 15    | 57       |
| 5     | <b>Y1 + Et<sub>3</sub>N</b>      | DCM (0.025M), -78 °C | 50    | 60       |

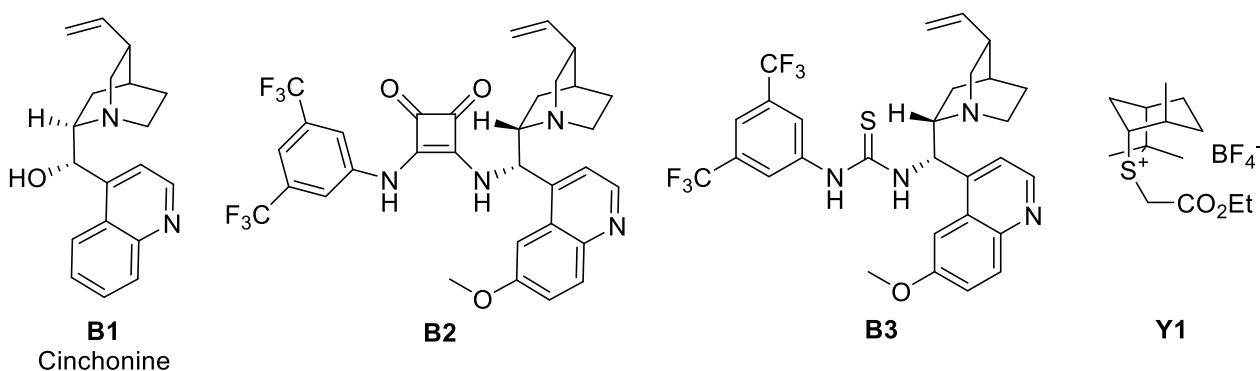

**Figure S4.** Tested chiral bases **B1–B3** and sulfonium salt **Y1**

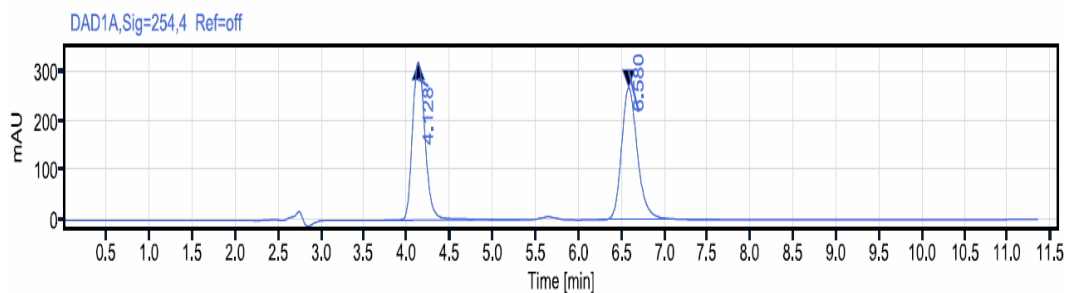

Signal: DAD1A,Sig=254,4 Ref=off

| RT [min] | Type | Width [min] | Area    | Height | Area % |
|----------|------|-------------|---------|--------|--------|
| 4.128    | MM m | 1.67        | 3298.82 | 317.68 | 49.04  |
| 6.580    | BM m | 1.41        | 3428.56 | 264.89 | 50.96  |

**Figure S5.** Chromatogram of racemic **3aa**

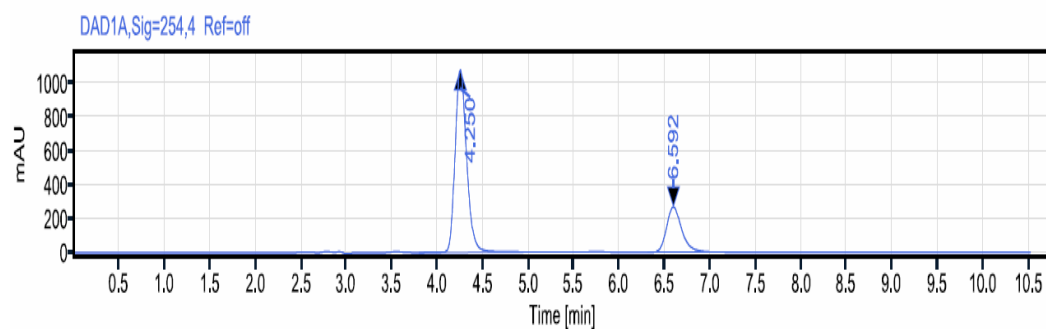

Signal: DAD1A,Sig=254,4 Ref=off

| RT [min] | Type | Width [min] | Area    | Height  | Area % |
|----------|------|-------------|---------|---------|--------|
| 4.250    | BM m | 1.45        | 9574.40 | 1080.04 | 75.12  |
| 6.592    | BM m | 1.12        | 3171.26 | 268.86  | 24.88  |

**Figure S6.** Chromatogram of enantioenriched **3aa** (entry 5, Table S1)

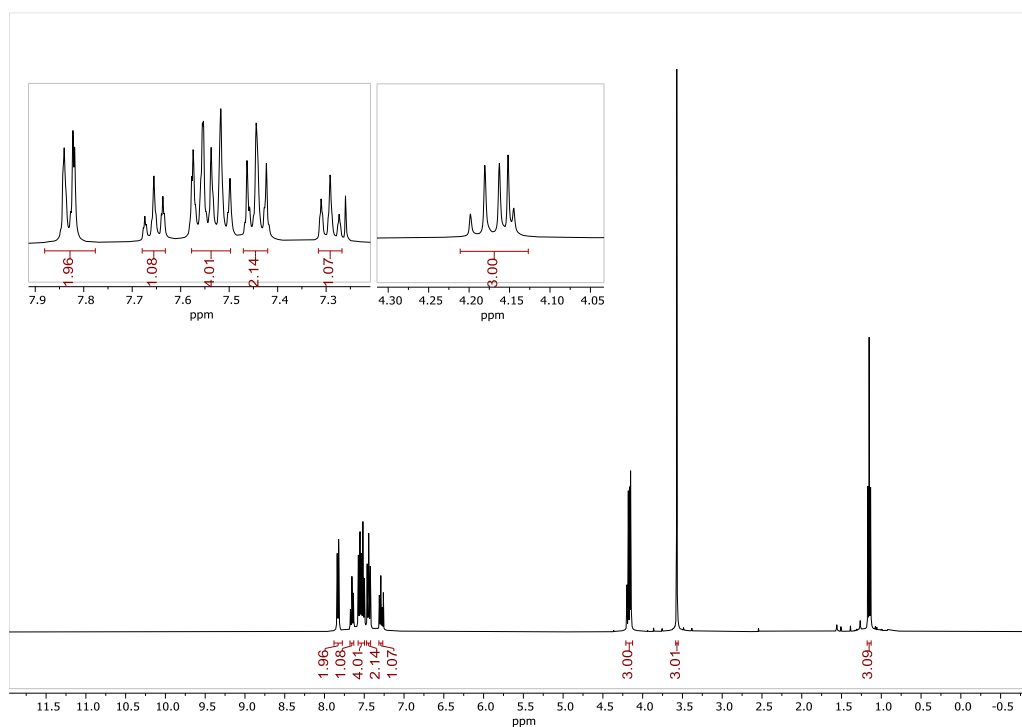

<sup>1</sup>H NMR of enantioenriched **3aa** (CDCl<sub>3</sub>; single diastereomer)

## Crystal structure determination

The unit cell parameters and the X-ray diffraction intensities were measured on a Xcalibur Ruby diffractometer. The empirical absorption correction was introduced by multi-scan method using SCALE3 ABSPACK algorithm [16]. Using the Olex2 [17], the structures were solved with the SHELXT [18] program and refined by the full-matrix least-squares method in the anisotropic approximation for all non-hydrogen atoms with the SHELXL program [19]. Hydrogen atoms bound to carbon were positioned geometrically and refined using a riding model. The hydrogen atoms of NH and OH groups were refined independently with isotropic displacement parameters.

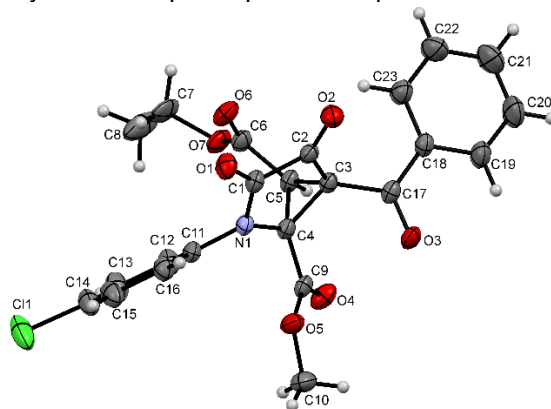

**Figure S7.** Molecular structure of compound **3ca** showing 30% probability amplitude displacement ellipsoids (CCDC 2410200).

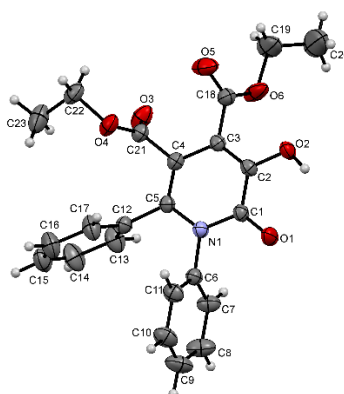

**Figure S8.** Molecular structure of compound **5aa** showing 30% probability amplitude displacement ellipsoids (CCDC 2410198).

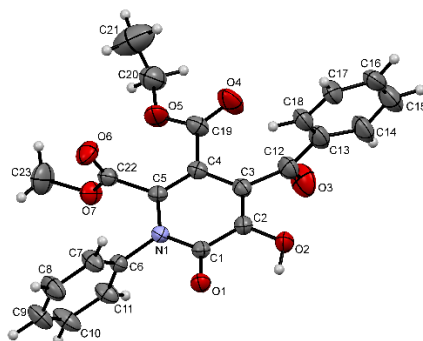

**Figure S9.** Molecular structure of compound **6aa** showing 30% probability amplitude displacement ellipsoids (CCDC 2410199).

**Table S2.** Crystal data and structure refinement for compounds **3ca**, **5aa**, **6aa**.

| Compound                                  | <b>3ca</b>                                                    | <b>5aa</b>                                                    | <b>6aa</b>                                                    |
|-------------------------------------------|---------------------------------------------------------------|---------------------------------------------------------------|---------------------------------------------------------------|
| CCDC                                      | 2410200                                                       | 2410198                                                       | 2410199                                                       |
| Empirical formula                         | C <sub>23</sub> H <sub>18</sub> ClNO <sub>7</sub>             | C <sub>23</sub> H <sub>21</sub> NO <sub>6</sub>               | C <sub>23</sub> H <sub>19</sub> NO <sub>7</sub>               |
| Formula weight                            | 455.83                                                        | 407.41                                                        | 421.39                                                        |
| Temperature, K                            | 295(2)                                                        | 295(2)                                                        | 295(2)                                                        |
| Crystal system                            | monoclinic                                                    | monoclinic                                                    | orthorhombic                                                  |
| Space group                               | P2 <sub>1</sub> /c                                            | I2/a                                                          | Pbcn                                                          |
| a, Å                                      | 11.3507(19)                                                   | 20.404(5)                                                     | 13.3392(19)                                                   |
| b, Å                                      | 11.705(2)                                                     | 9.4554(19)                                                    | 16.5142(19)                                                   |
| c, Å                                      | 17.151(3)                                                     | 22.554(3)                                                     | 19.544(3)                                                     |
| α, °                                      | 90                                                            | 90                                                            | 90                                                            |
| β, °                                      | 94.734(14)                                                    | 91.201(17)                                                    | 90                                                            |
| γ, °                                      | 90                                                            | 90                                                            | 90                                                            |
| Volume, Å <sup>3</sup>                    | 2271.0(7)                                                     | 4350.3(15)                                                    | 4305.3(10)                                                    |
| Z                                         | 4                                                             | 8                                                             | 8                                                             |
| Density (calculated), g/cm <sup>3</sup>   | 1.333                                                         | 1.244                                                         | 1.300                                                         |
| Absorption coefficient, mm <sup>-1</sup>  | 0.212                                                         | 0.091                                                         | 0.097                                                         |
| F(000)                                    | 944.0                                                         | 1712.0                                                        | 1760.0                                                        |
| Crystal size, mm <sup>3</sup>             | 0.6 × 0.5 × 0.06                                              | 0.35 × 0.25 × 0.04                                            | 0.5 × 0.35 × 0.2                                              |
| Radiation                                 | Mo Kα (λ = 0.71073)                                           | Mo Kα (λ = 0.71073)                                           | Mo Kα (λ = 0.71073)                                           |
| 2θ range for data collection, °           | 4.218 to 59.35                                                | 3.994 to 58.944                                               | 3.926 to 58.958                                               |
| Index ranges                              | -14 ≤ h ≤ 14, -10 ≤ k ≤ 16, -20 ≤ l ≤ 23                      | -27 ≤ h ≤ 26, -12 ≤ k ≤ 12, -29 ≤ l ≤ 31                      | -8 ≤ h ≤ 17, -20 ≤ k ≤ 14, -17 ≤ l ≤ 24                       |
| Reflections collected                     | 12632                                                         | 11810                                                         | 15135                                                         |
| Independent reflections                   | 5480 [R <sub>int</sub> = 0.0334, R <sub>sigma</sub> = 0.0516] | 5141 [R <sub>int</sub> = 0.0456, R <sub>sigma</sub> = 0.0632] | 5264 [R <sub>int</sub> = 0.0408, R <sub>sigma</sub> = 0.0483] |
| Data/restraints/parameters                | 5480/41/311                                                   | 5141/96/327                                                   | 5264/244/362                                                  |
| Goodness-of-fit on F <sup>2</sup>         | 1.023                                                         | 1.038                                                         | 1.019                                                         |
| Final R indexes [I >= 2σ(I)]              | R <sub>1</sub> = 0.0608, wR <sub>2</sub> = 0.1485             | R <sub>1</sub> = 0.0710, wR <sub>2</sub> = 0.1840             | R <sub>1</sub> = 0.0608, wR <sub>2</sub> = 0.1482             |
| Final R indexes [all data]                | R <sub>1</sub> = 0.1094, wR <sub>2</sub> = 0.1912             | R <sub>1</sub> = 0.1296, wR <sub>2</sub> = 0.2446             | R <sub>1</sub> = 0.1202, wR <sub>2</sub> = 0.1935             |
| Largest diff. peak/hole, eÅ <sup>-3</sup> | 0.33/-0.47                                                    | 0.43/-0.27                                                    | 0.25/-0.17                                                    |

## References:

1. Maslivets A. N. et al. Five-Membered 2, 3-Dioxoheterocycles. Part 12. Thermolysis of 1-Aryl-4-aryl-5-methoxycarbonyl-2,3-dihydro-2, 3-pyrrole-diones. *Zhurnal Organicheskoi Khimii*, **1987**, 23(7), 1534
2. Moroz A. A. et al. Diversity-oriented synthesis of three skeletally diverse iminolactones from isocyanides, activated acetylenes and 1H-pyrrole-2,3-diones via [3+ 2] and [4+ 1] cycloaddition reactions. *Tetrahedron*, **2020**, 76(5), 130880
3. Dmitriev M. V. et al. Recyclization of Pyrrolediones with Arylaminoindenones. Synthesis of Indeno[1,2-b]pyridines. *Russian Journal of Organic Chemistry*, **2018**, 54, 1358
4. Silaichev P. S. et al. Five-membered 2, 3-dioxoheterocycles: LXXXIV.[4+2]-Cycloaddition of styrene to 4,5-diaroyl-1H-pyrrole-2,3-diones. Crystal and molecular structures of 7a-(2,5-dimethylbenzoyl)-4-(2,5-dimethylphenyl)-1-(4-methoxyphenyl)-6-phenyl-7,7a-dihydropyrano[4,3-b]-pyrrole-2,3(1H,6H)-dione. *Russian Journal of Organic Chemistry*, **2012**, 48, 253
5. Silaichev P. S. et al. Five-membered 2, 3-dioxo heterocycles: LXXXV. Synthesis of methyl 1-aryl-4,5-dioxo-3-(1-oxo-3-phenylprop-2-en-1-yl)-4,5-dihydro-1H-pyrrole-2-carboxylates and their reaction with 3-amino-5,5-dimethylcyclohex-2-en-1-ones. Molecular and crystalline structure of 4'-hydroxy-1'-(4-methoxyphenyl)-6,6-dimethyl-3'-(1-oxo-3-phenylprop-2-en-1-yl)-1-phenyl-6,7-dihydrospiro[indole-3,2'-pyrrole]-2,4,5'(1H,1'H,5H)-trione. *Russian Journal of Organic Chemistry*, **2012**, 48, 561
6. Sano T. et al. Dioxopyrrolines. XXVII. Syntheses of 2-Aryl-3-ethoxycarbonyl- $\Delta^2$ -pyrroline-4, 5-diones. *Chemical and pharmaceutical bulletin*, **1984**, 32, 2, 497
7. Moroz A. A., Dmitriev M. V., Maslivets A. N. Regioselective [3+2] cycloaddition of nitrile oxides to 1H-pyrrole-2,3-diones: synthesis of spiro[pyrroledioxazoles]. *Chemistry of Heterocyclic Compounds*, **2021**, 57, 12, 1230.
8. Belikov M. Y., Milovidova A. G., Ilev M. Y. A novel three-position molecular switch based on the transformations of a cyano-substituted pyrrol-2-one derivative. *New Journal of Chemistry*, 2022, 46, 23, 11030.
9. Johnson A. W., Amel R. T. Chemistry of Ylides. XIX.. beta.-Carbonyl sulfonium ylides. *The Journal of Organic Chemistry*, **1969**, 34, 5, 1240
10. Ushakov P. Y. et al. Synthesis of Isoxazolines from Nitroalkanes via a [4+ 1]-Annulation Strategy. *Advanced Synthesis & Catalysis*, **2019**, 361, 23, 5322
11. Wang Q. G. et al. Tandem Michael addition/ylide epoxidation for the synthesis of highly functionalized cyclohexadiene epoxide derivatives. *Journal of the American Chemical Society*, **2008**, 130, 16, 5408
12. Caneschi W. et al. Synthesis and anticancer evaluation of new lipophilic 1, 2, 4 and 1, 3, 4-oxadiazoles. *European journal of medicinal chemistry*, **2019**, 165, 18.
13. Yang, W., & Du, D. M. Highly enantioselective Michael addition of nitroalkanes to chalcones using chiral squaramides as hydrogen bonding organocatalysts. *Organic Letters*, **2010**, 12(23), 5450–5453.
14. Vakulya, B., Varga, S., Csámpai, A., & Soós, T. Highly enantioselective conjugate addition of nitromethane to chalcones using bifunctional cinchona organocatalysts. *Organic letters*, **2005**, 7(10), 1967–1969.
15. Midura, W. H., Ścianowski, J., Banach, A., & Zając, A. Asymmetric synthesis of cyclopropyl phosphonates using chiral terpenyl sulfonium and selenonium ylides. *Tetrahedron: Asymmetry*, **2014**, 25(22), 1488-1493.
16. *CrysAlisPro*, Version 1.171.42.74a, Rigaku Oxford Diffraction, **2022**.
17. Dolomanov O.V., Bourhis L.J., Gildea R.J., Howard J.A.K., Puschmann H. *J. Appl. Cryst.*, **2009**, 42, 339.
18. Sheldrick G.M. *Acta Crystallogr., Sect. A: Found. Adv.*, **2015**, 71, 3.
19. Sheldrick G.M. *Acta Crystallogr., Sect. C: Struct. Chem.*, **2015**, 71, 3.

# Copies of NMR spectra

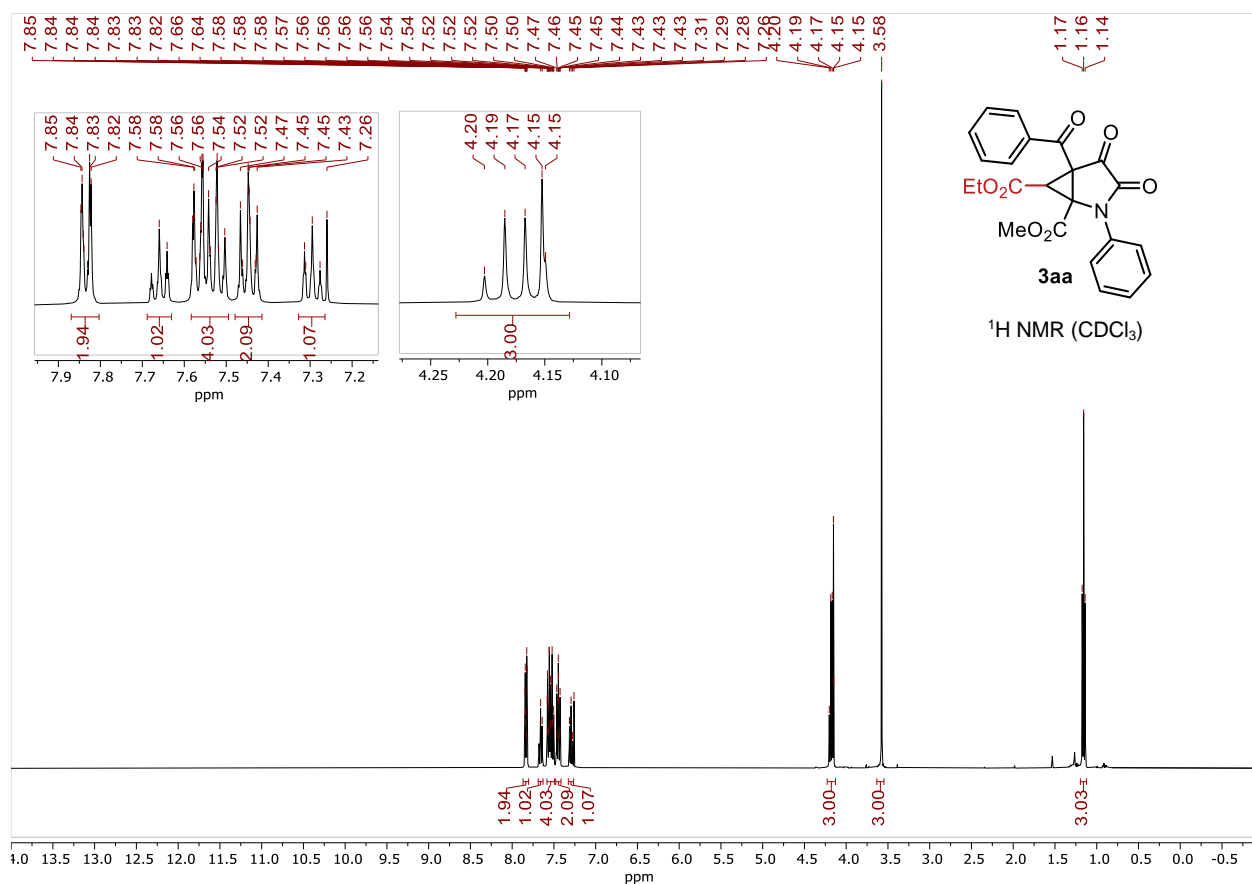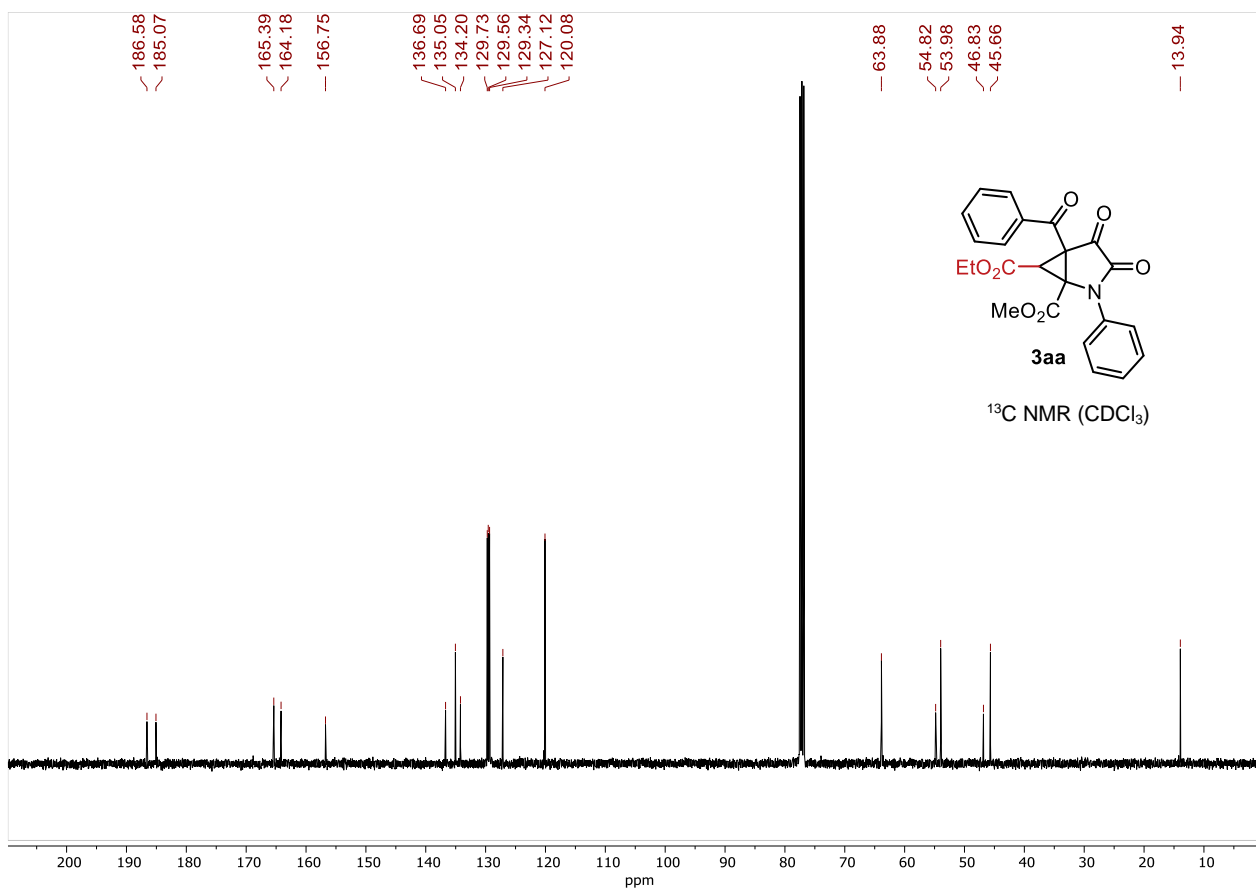

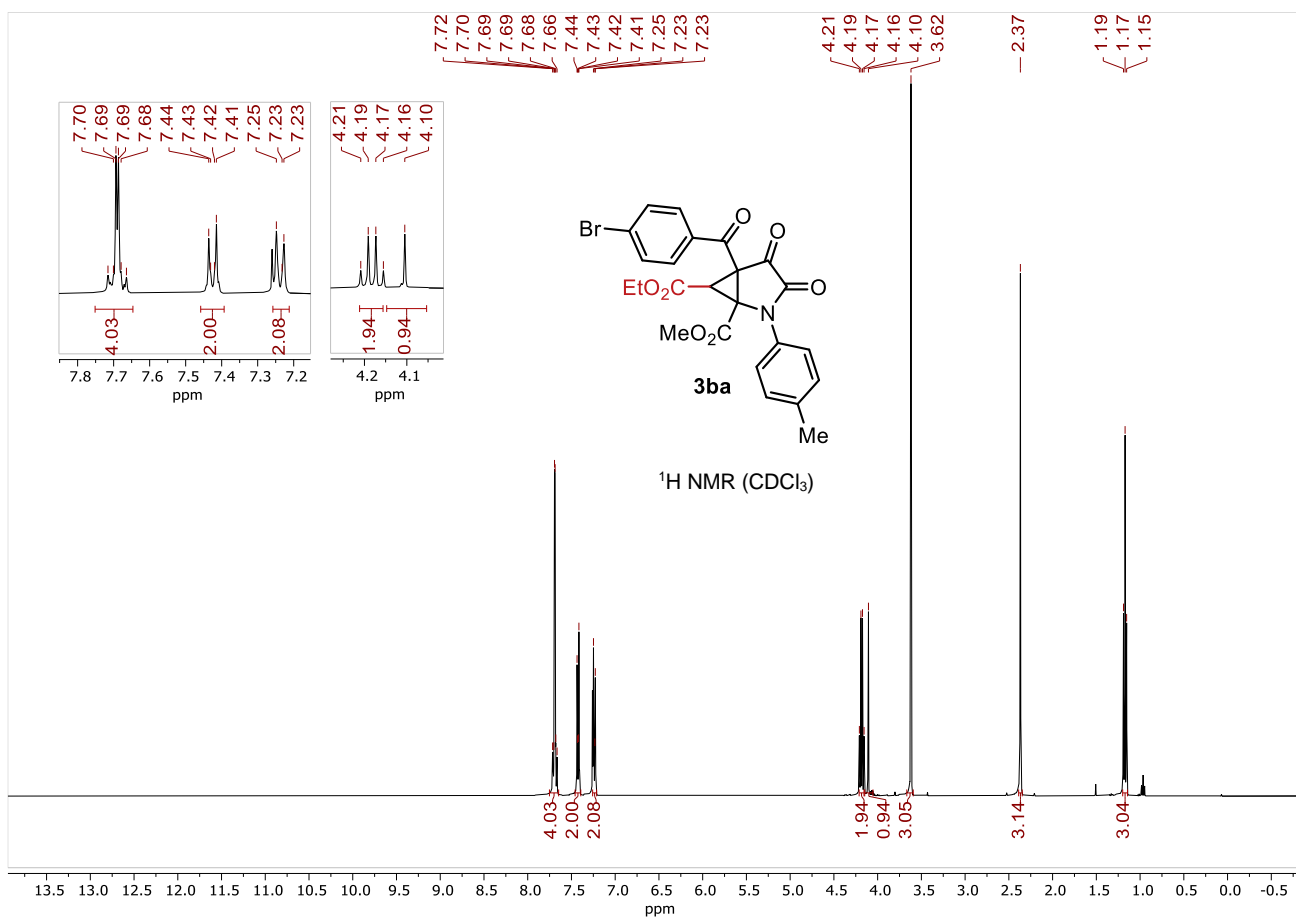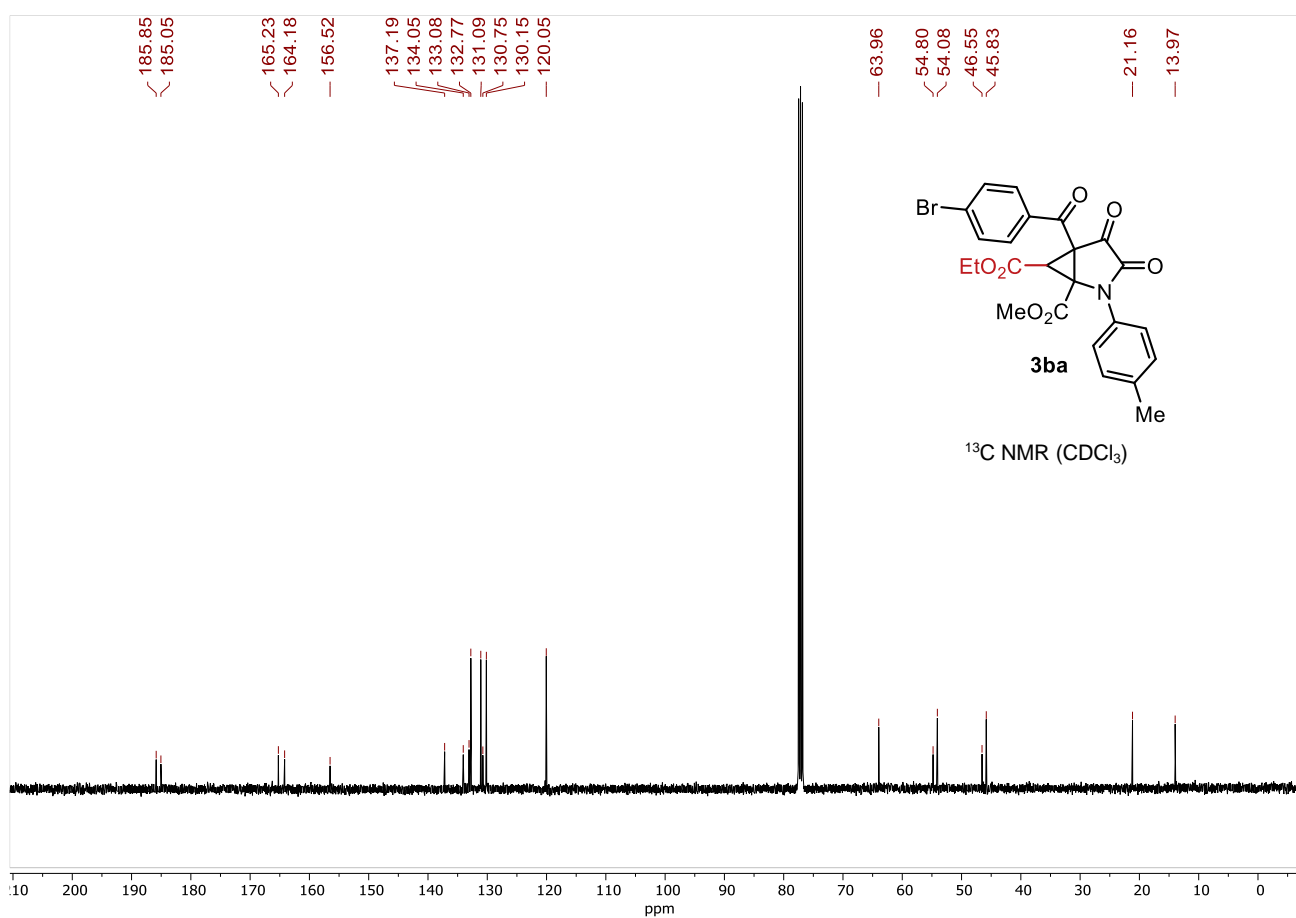



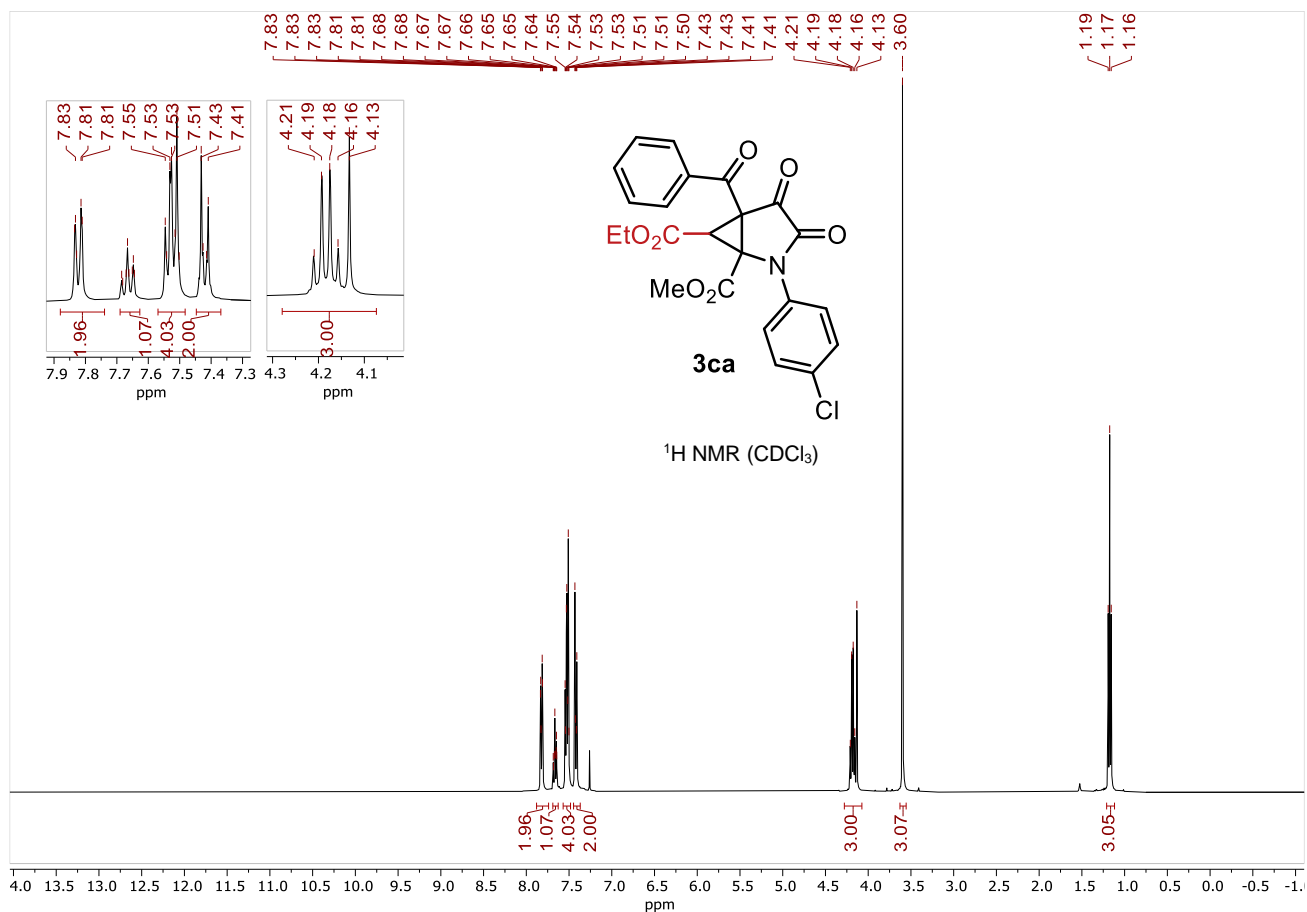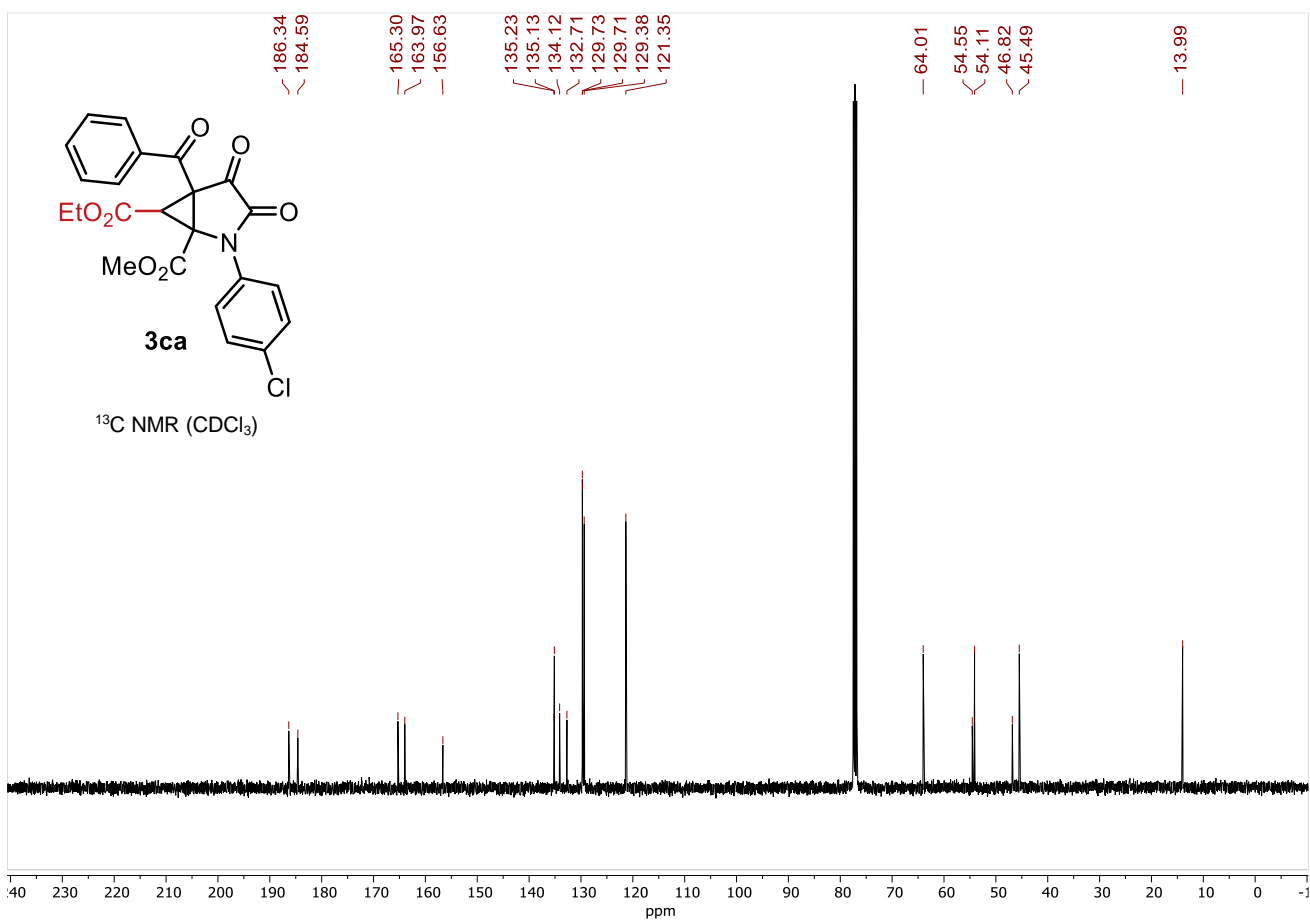

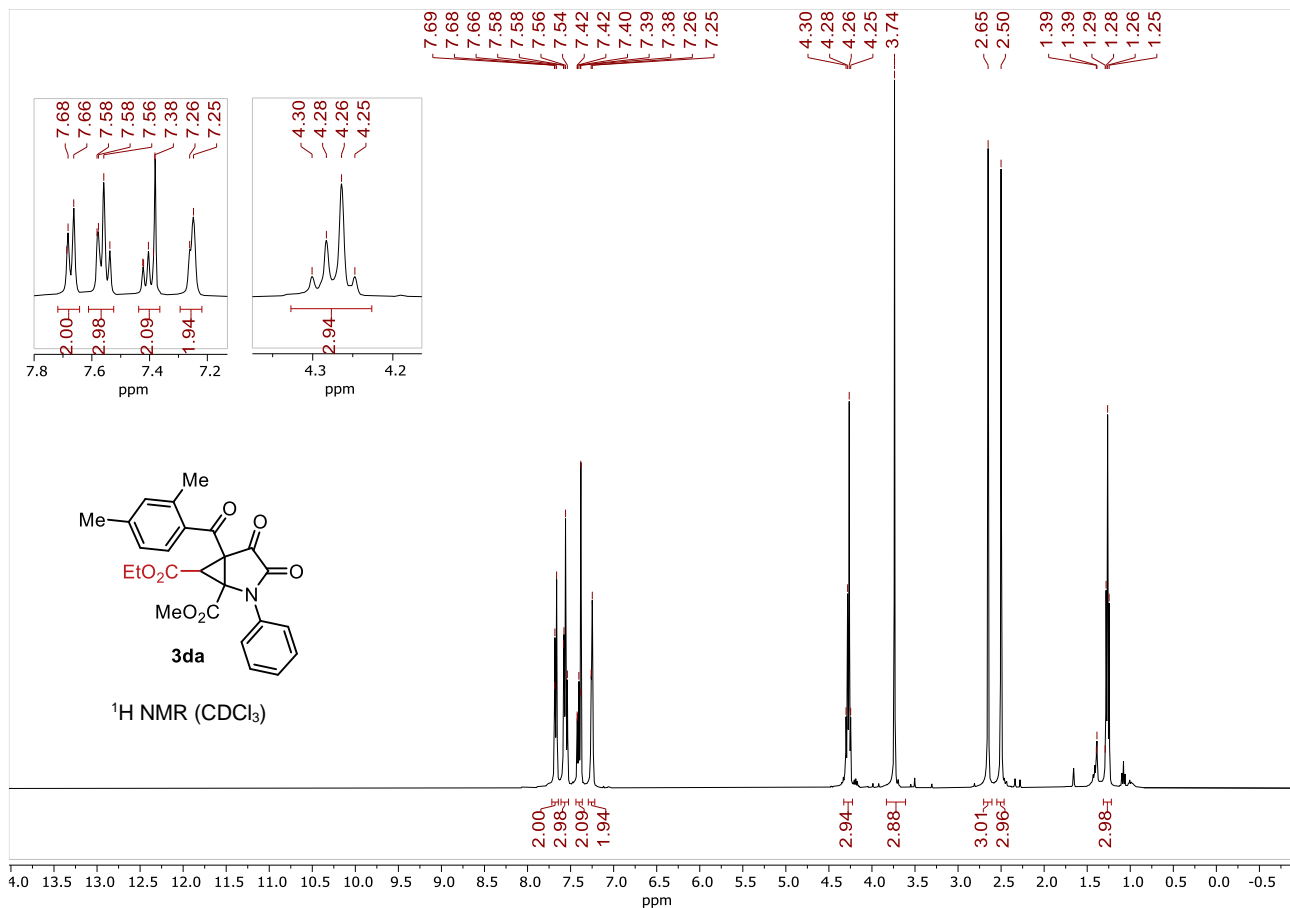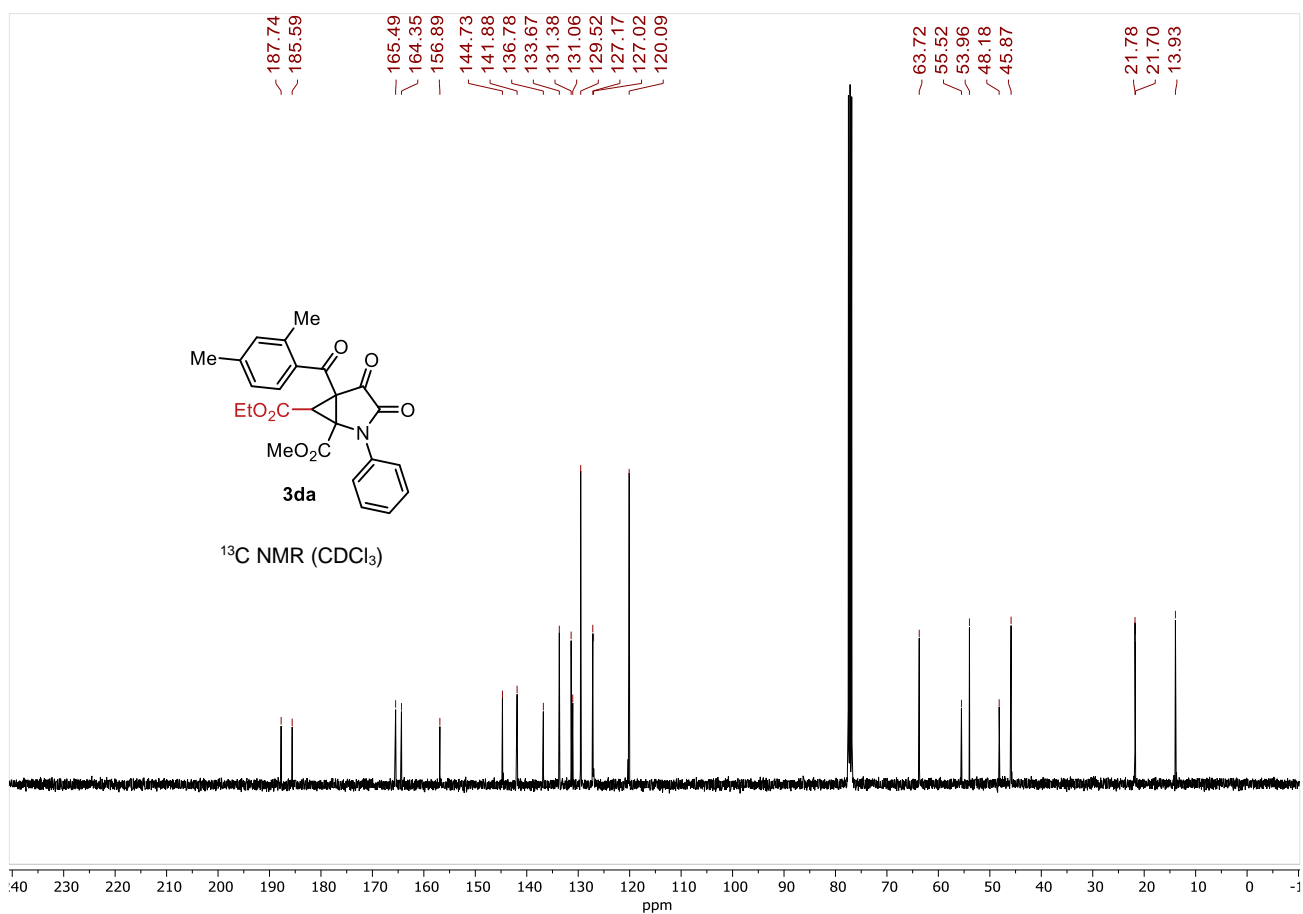

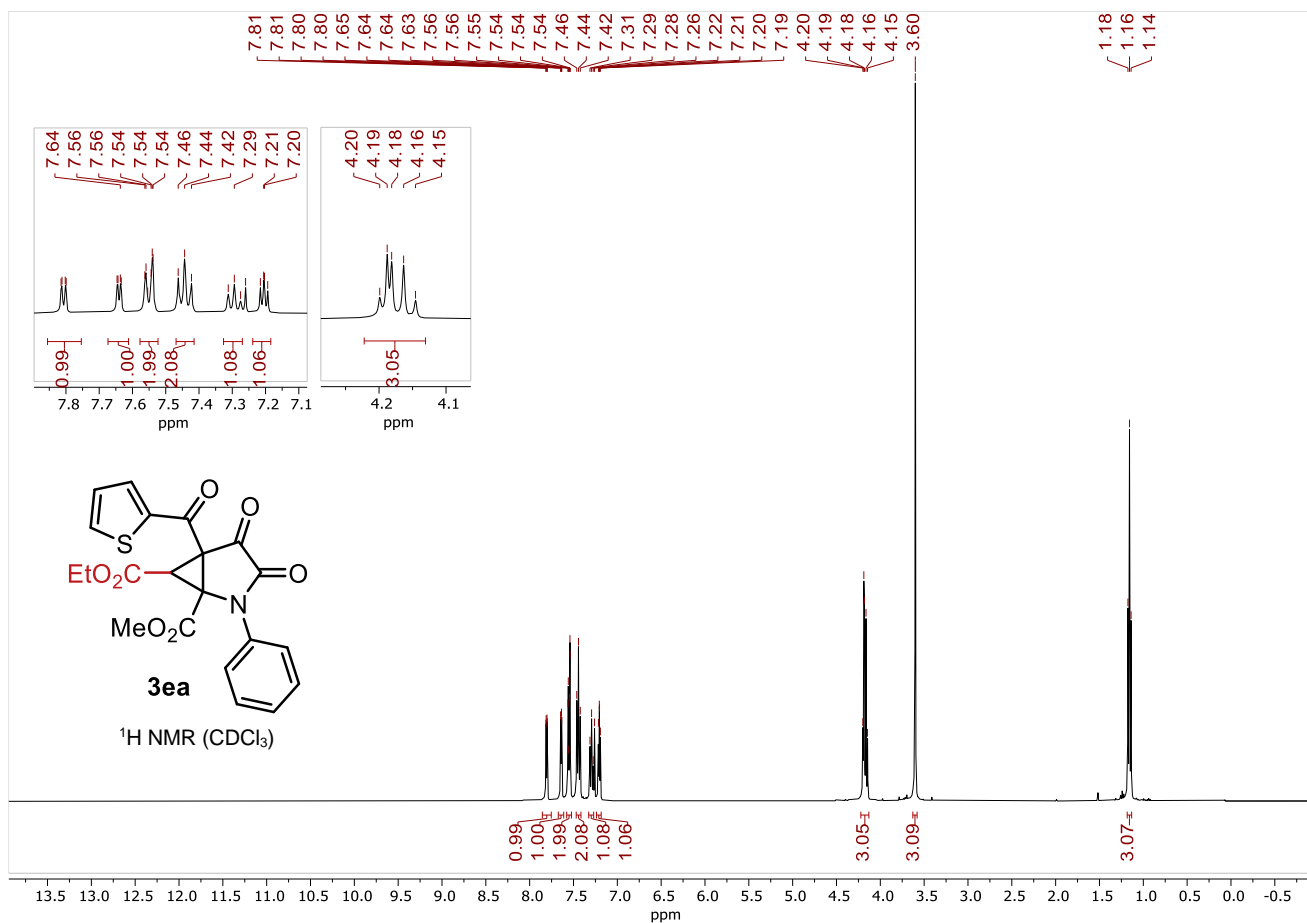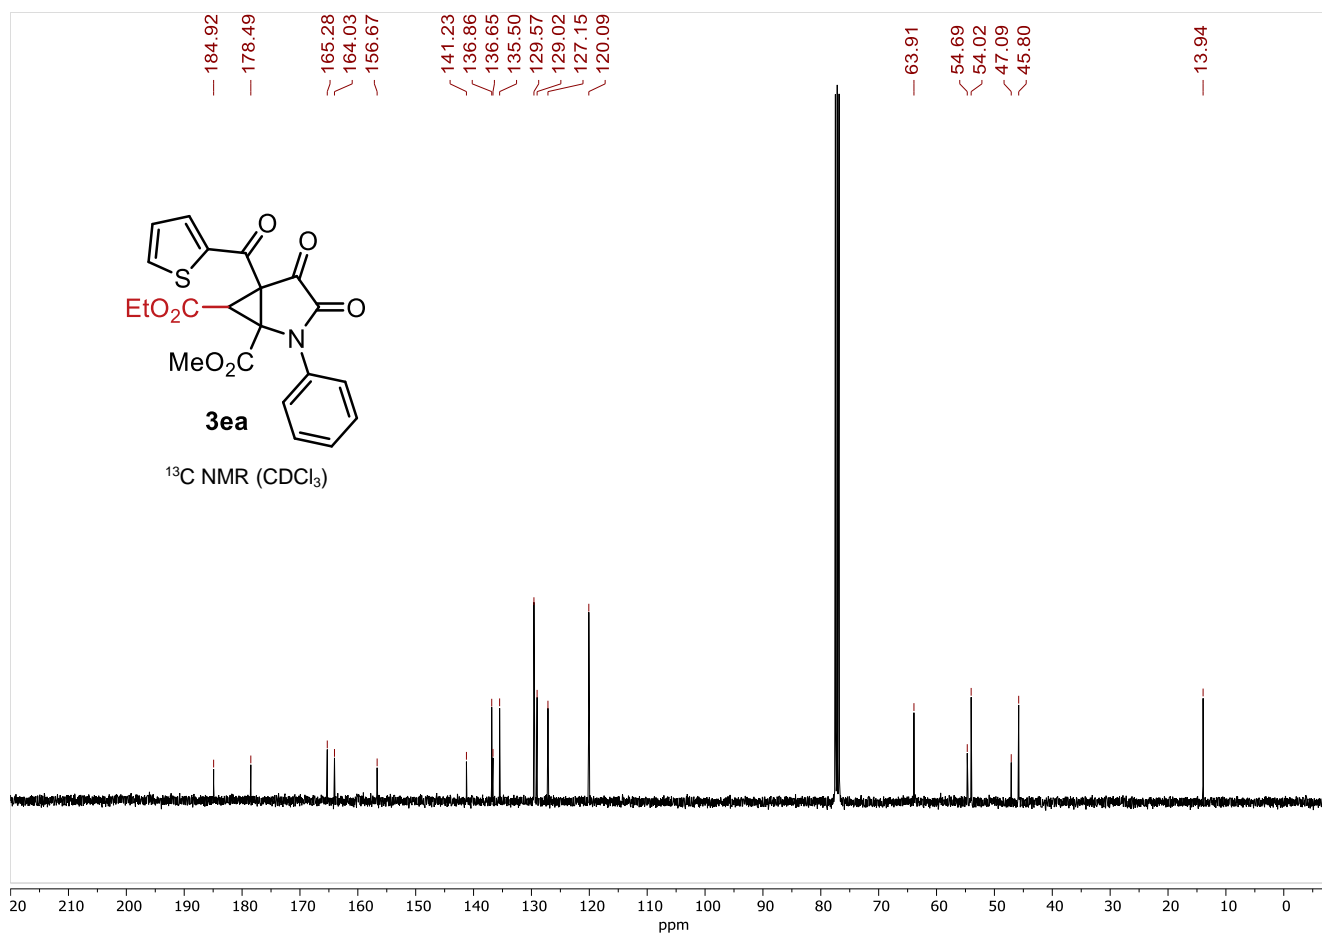

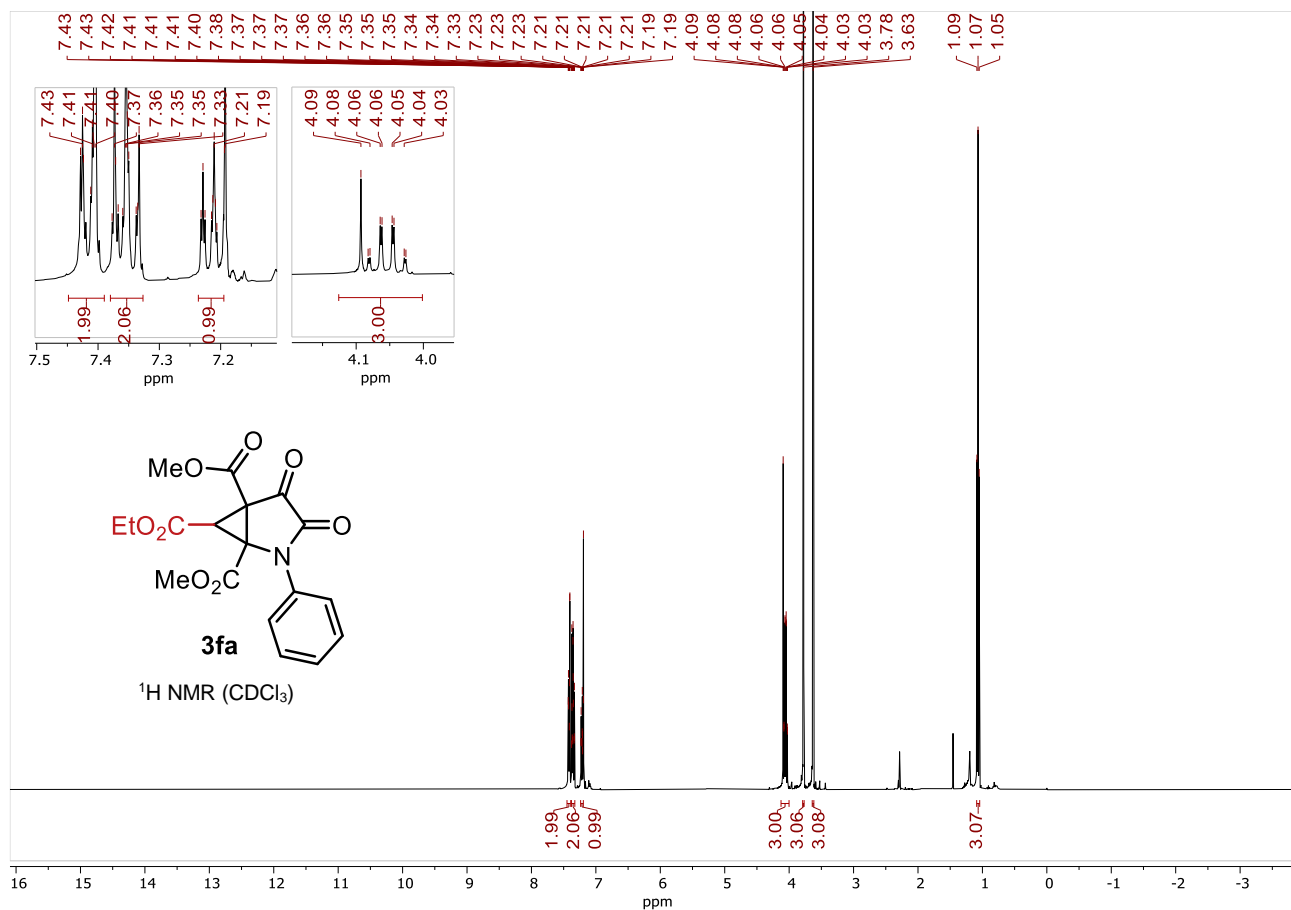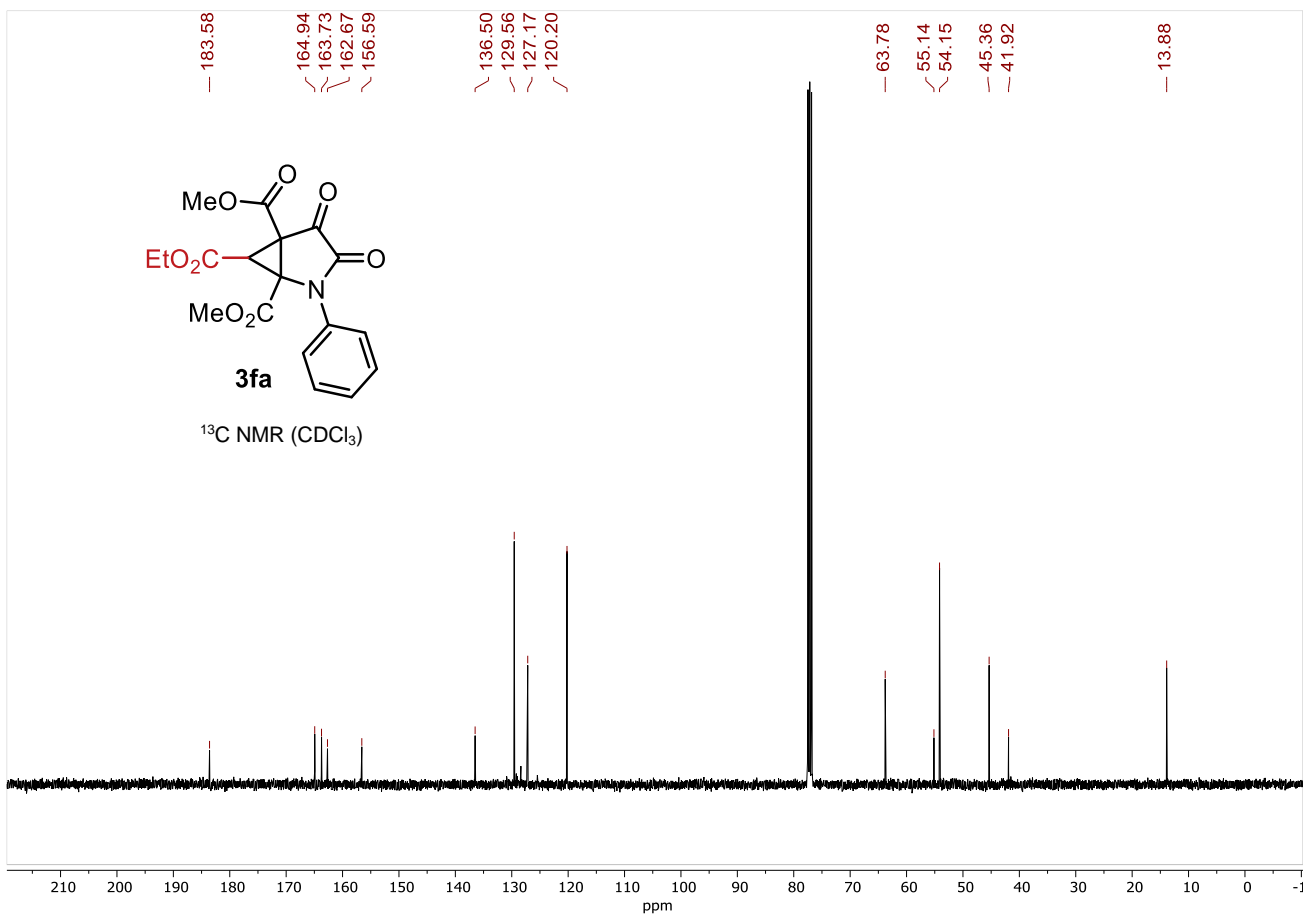

MAN8872.1.fid  
MAN8872 1H

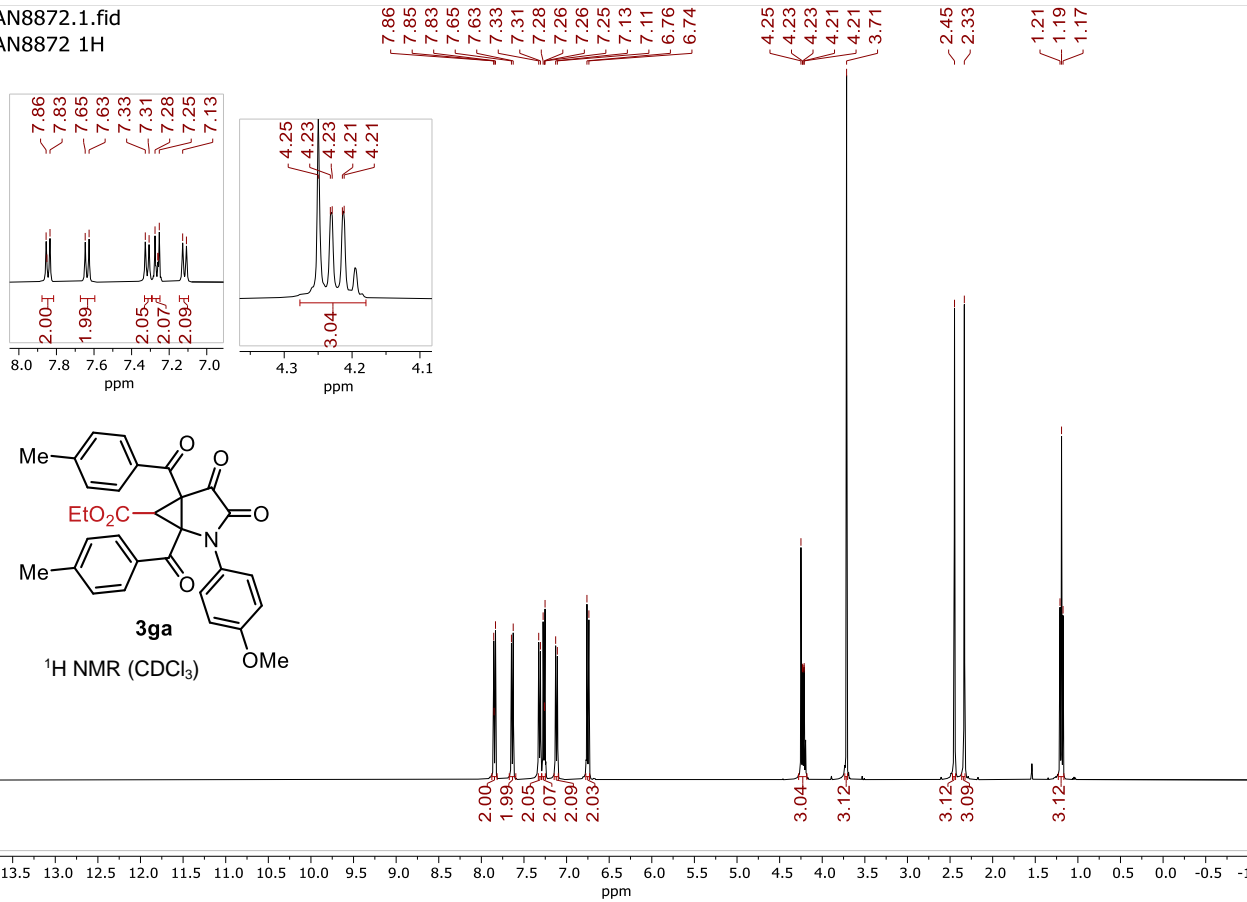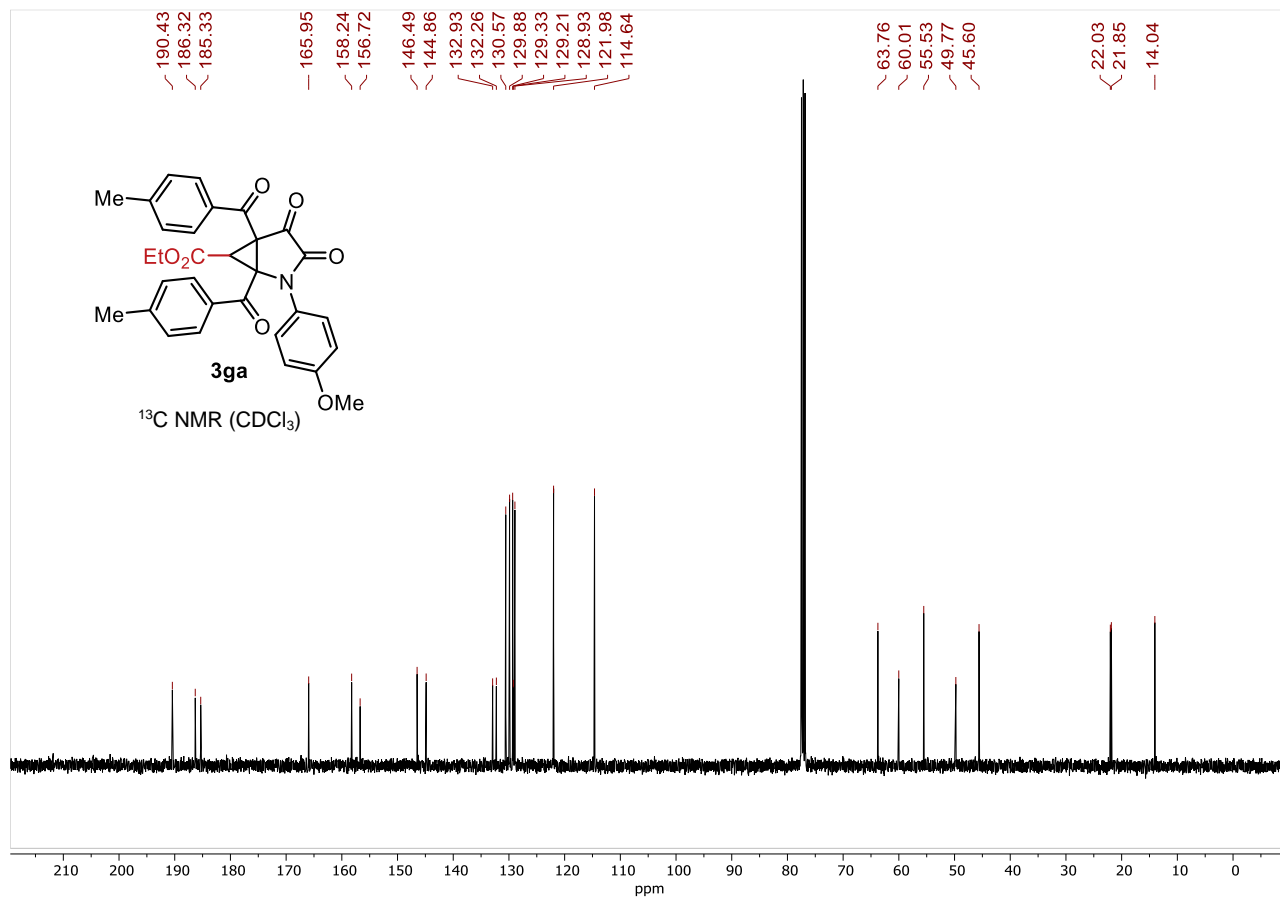

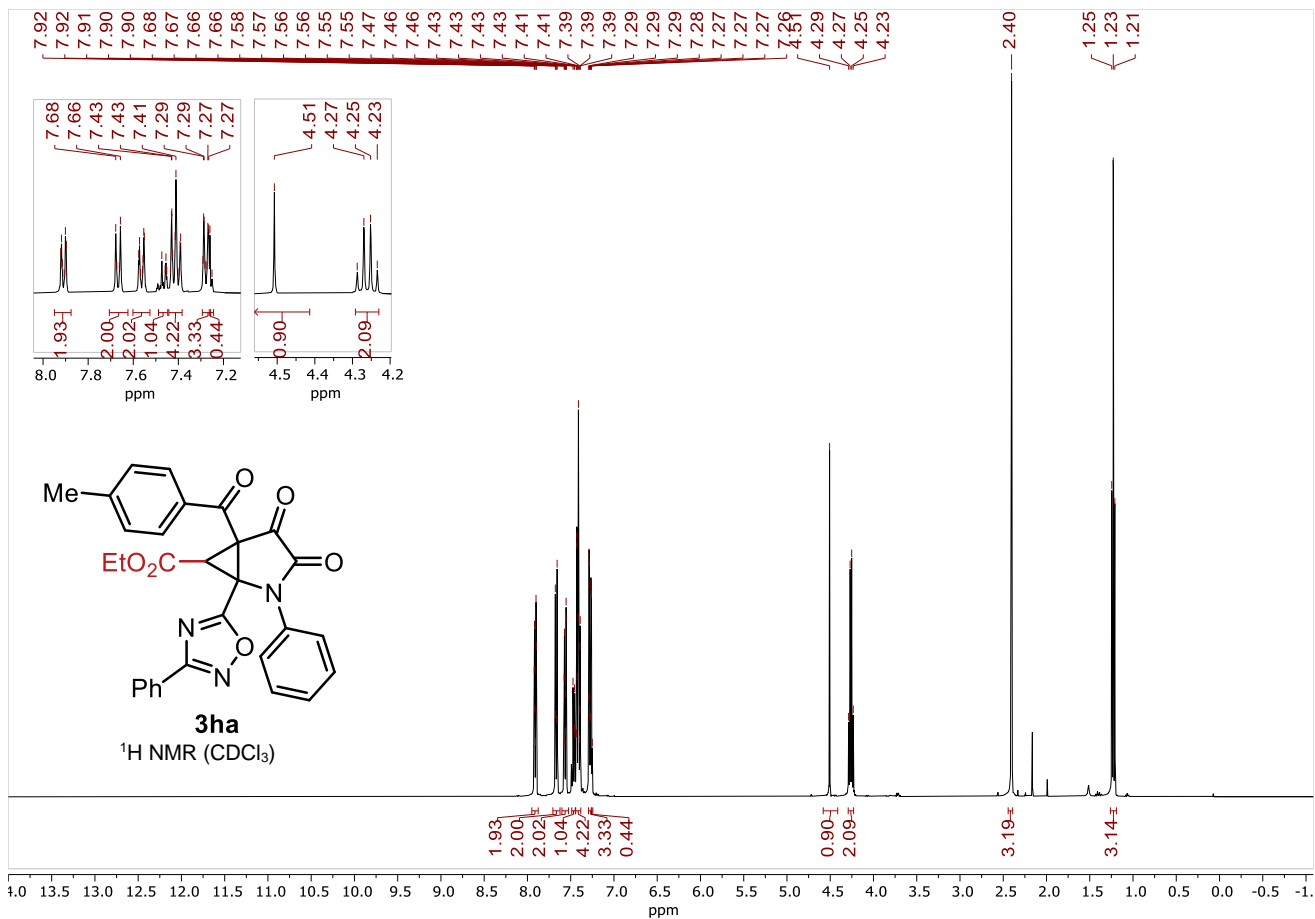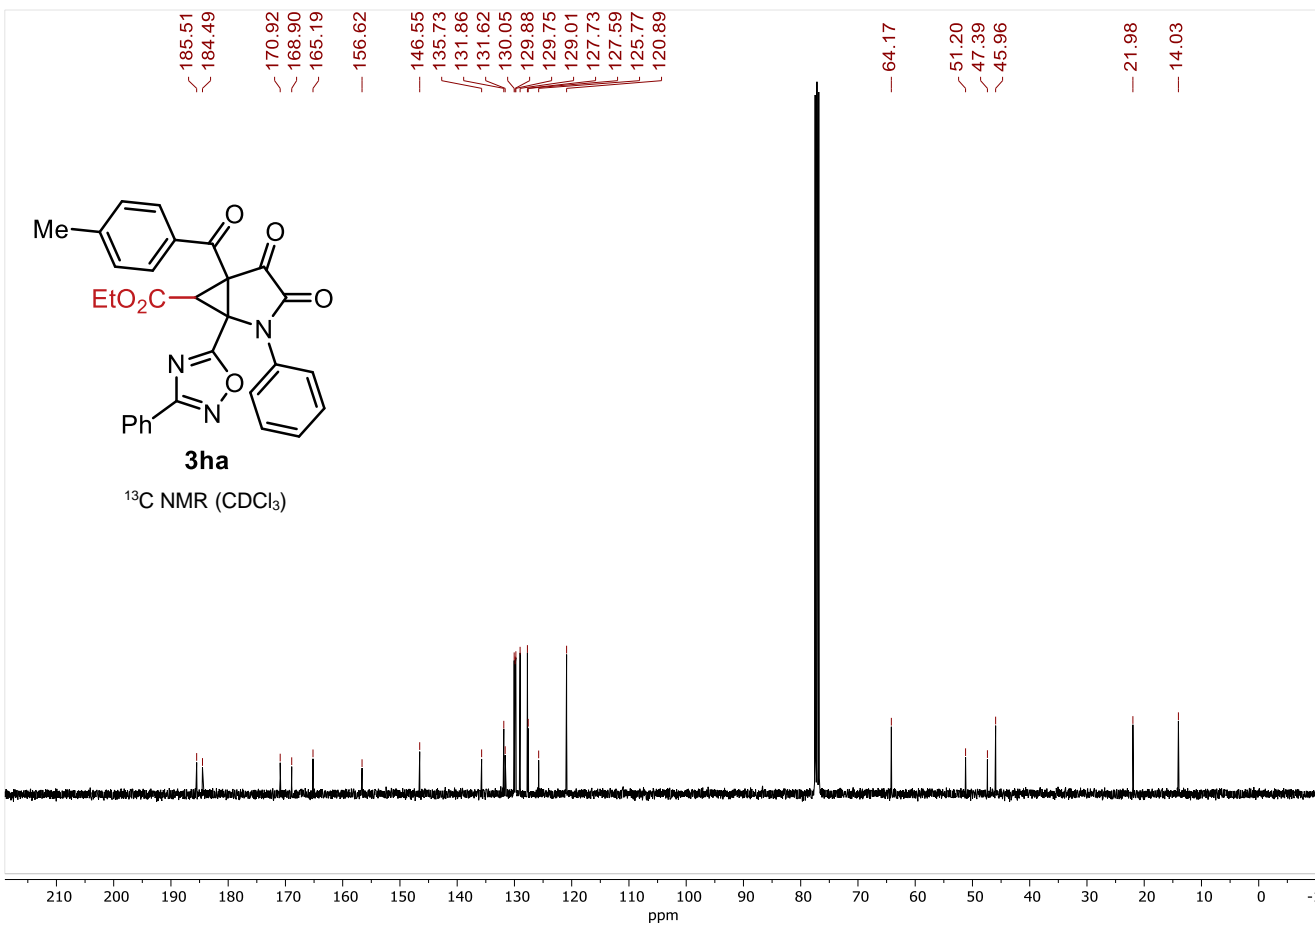







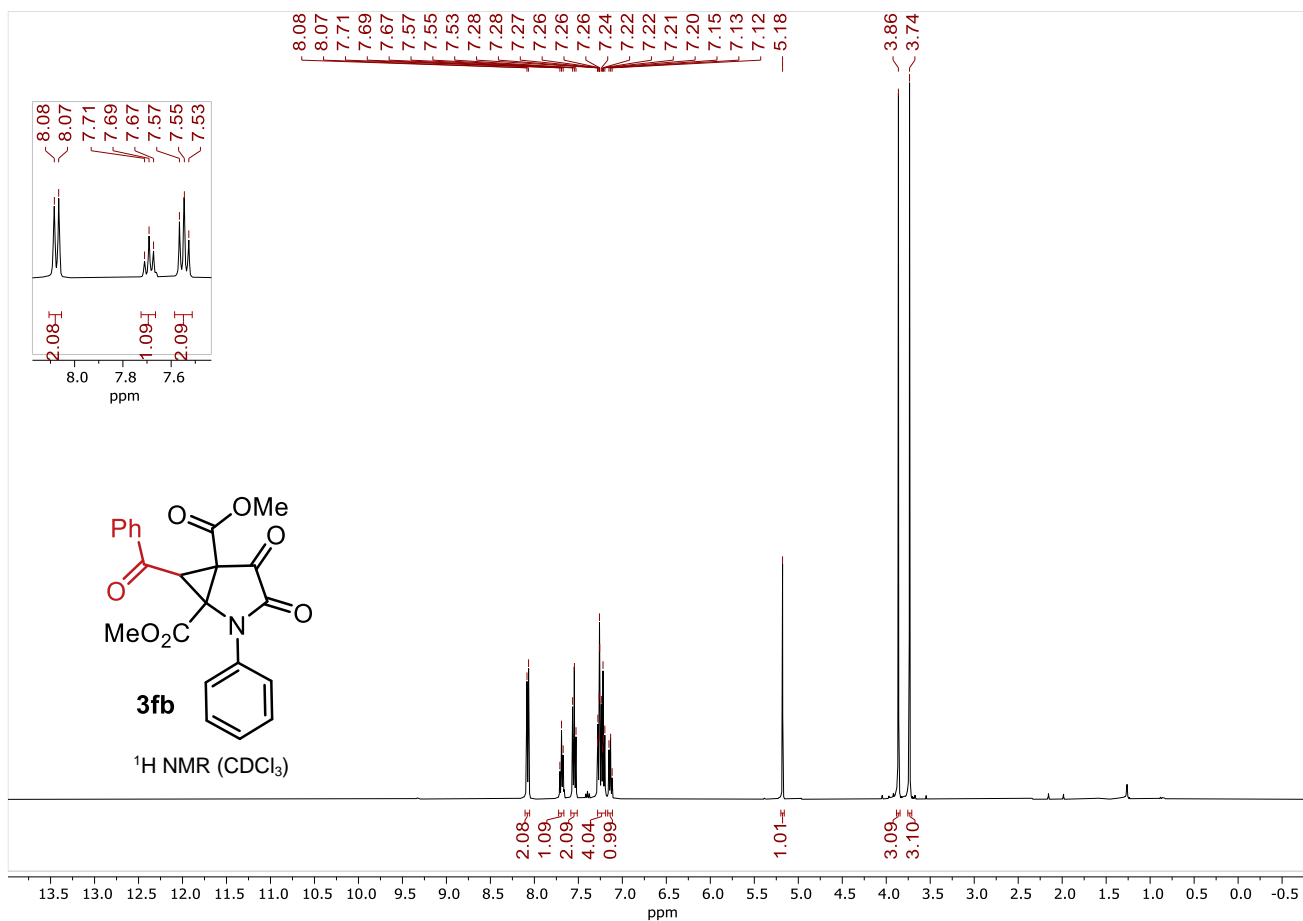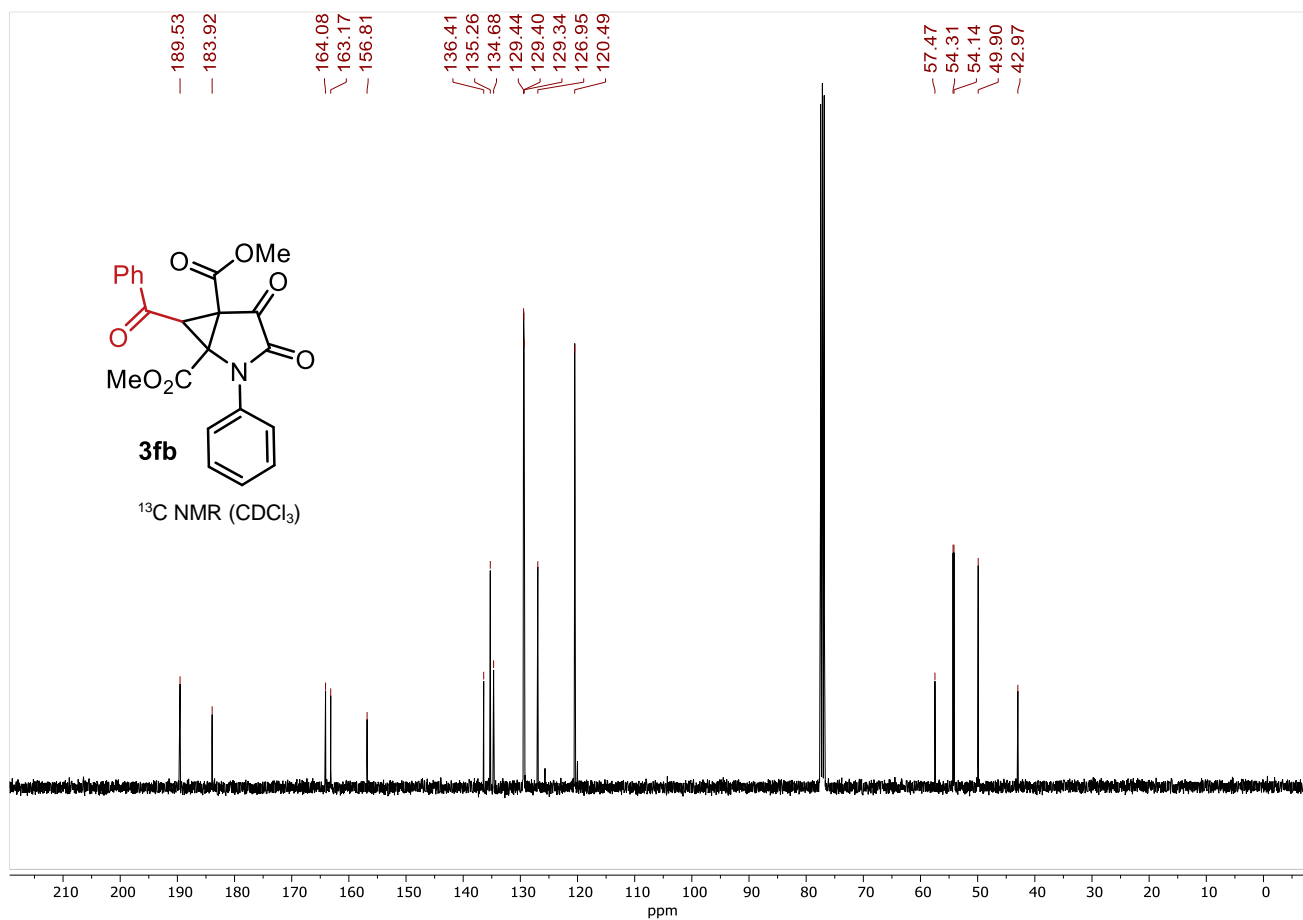

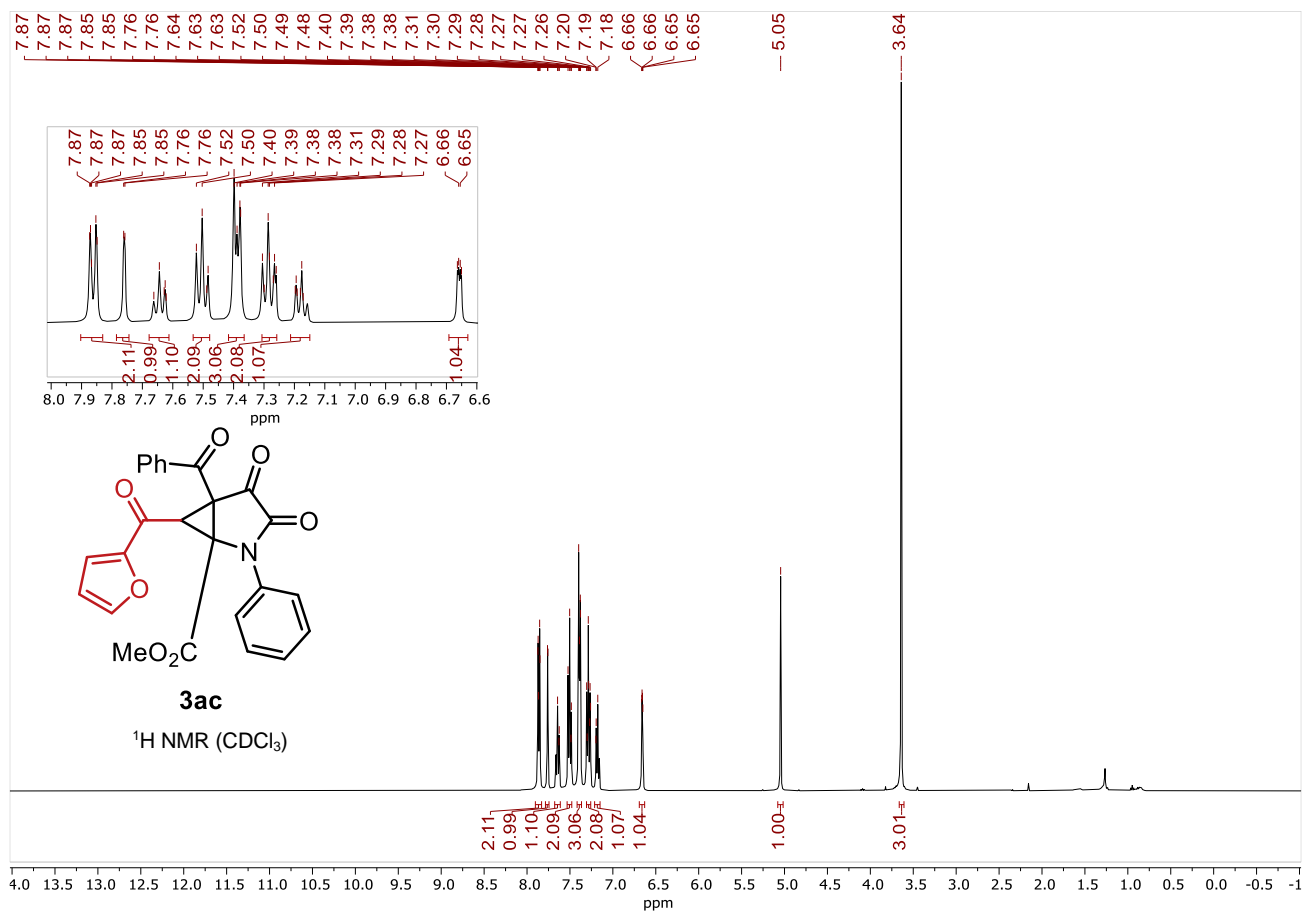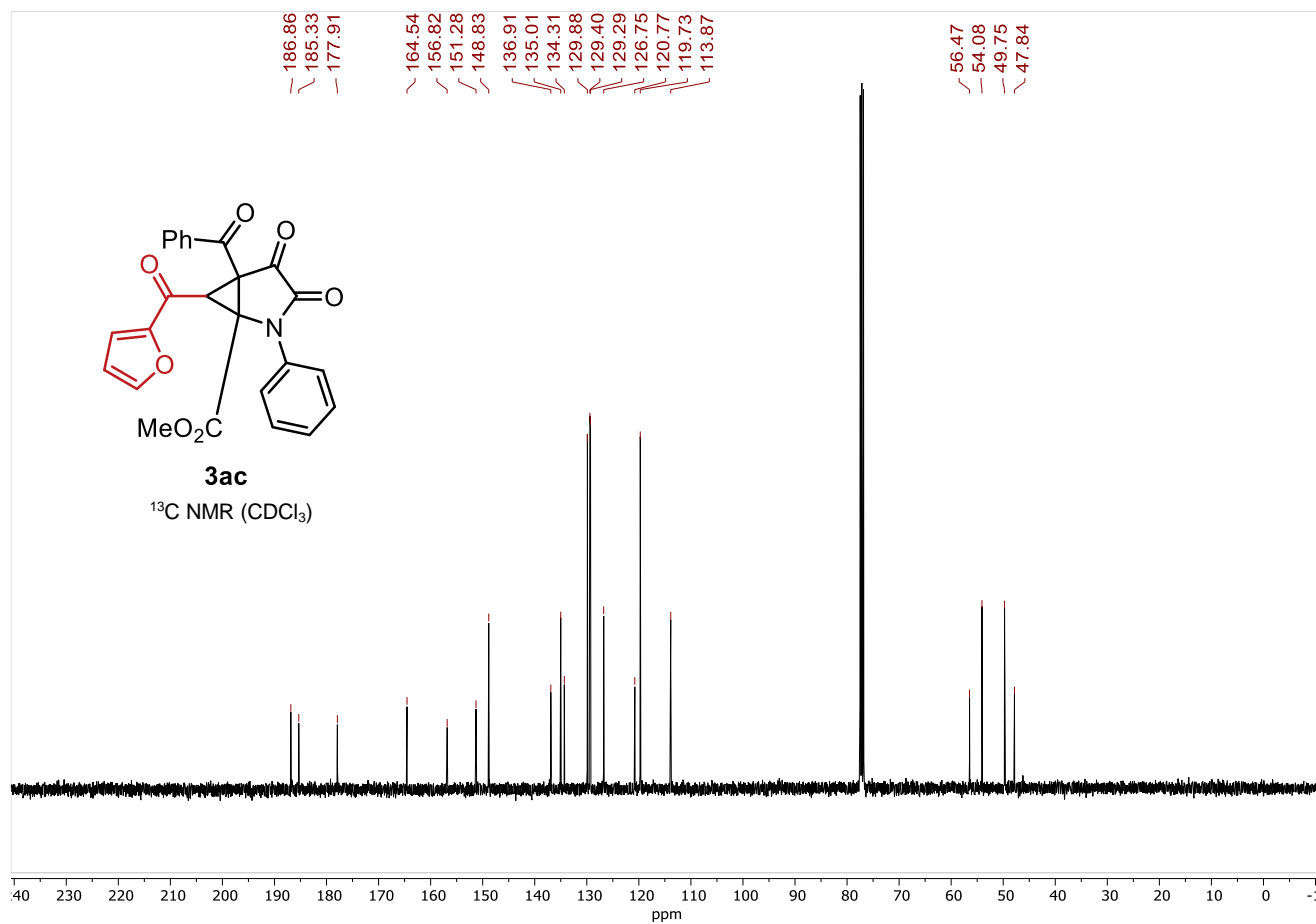

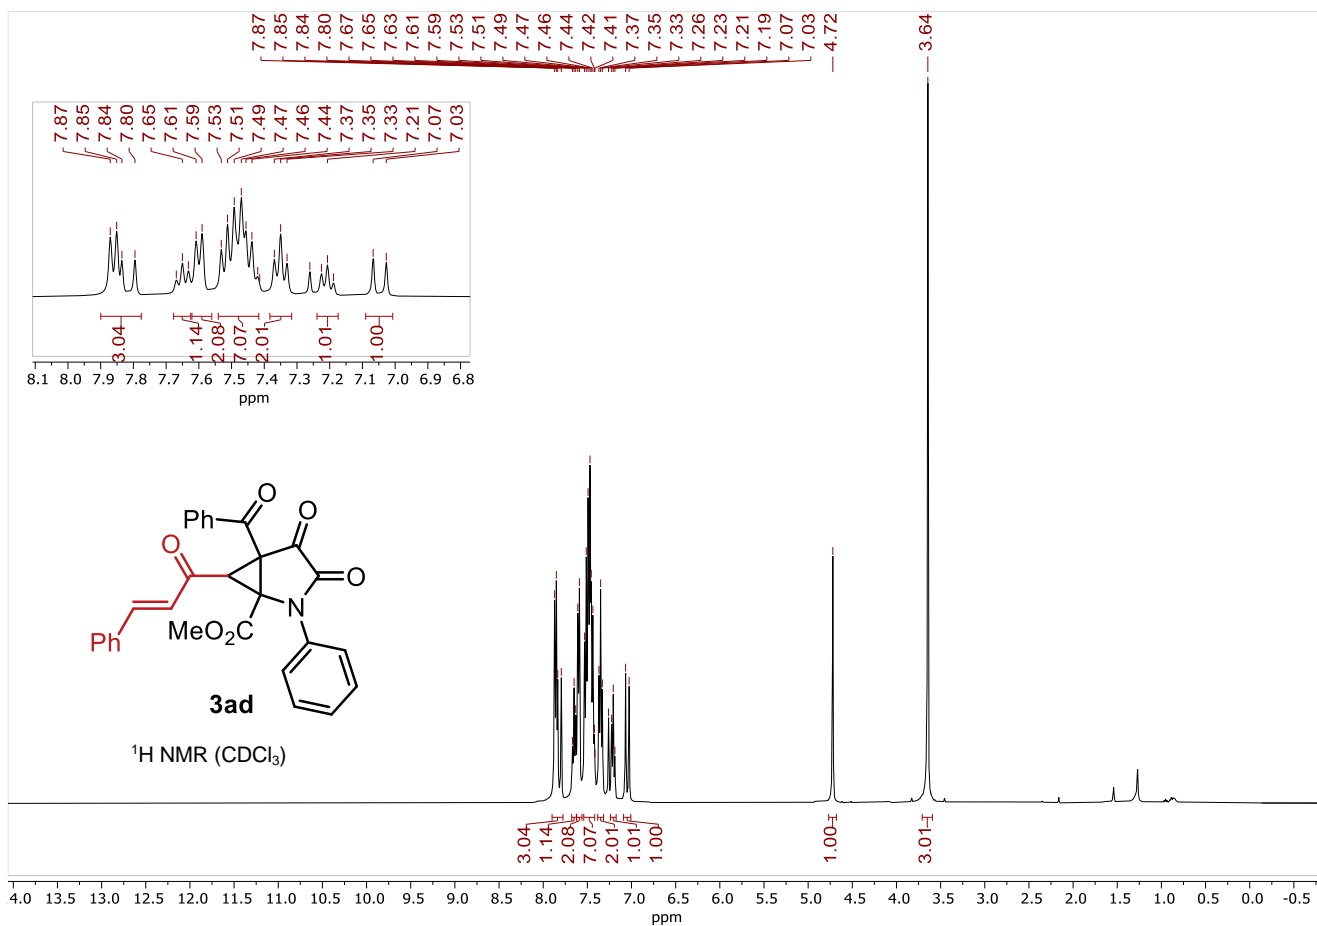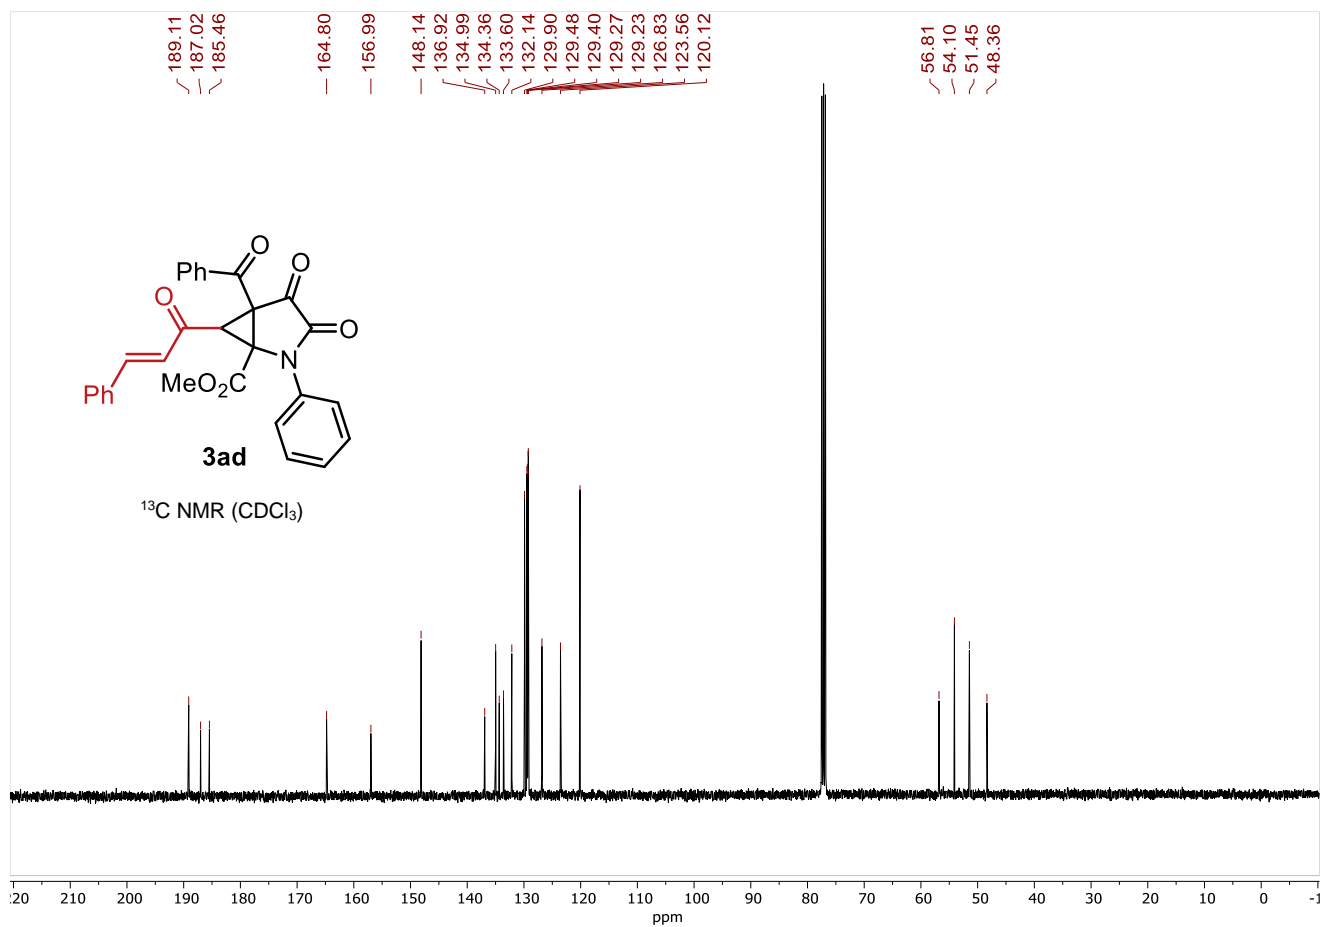

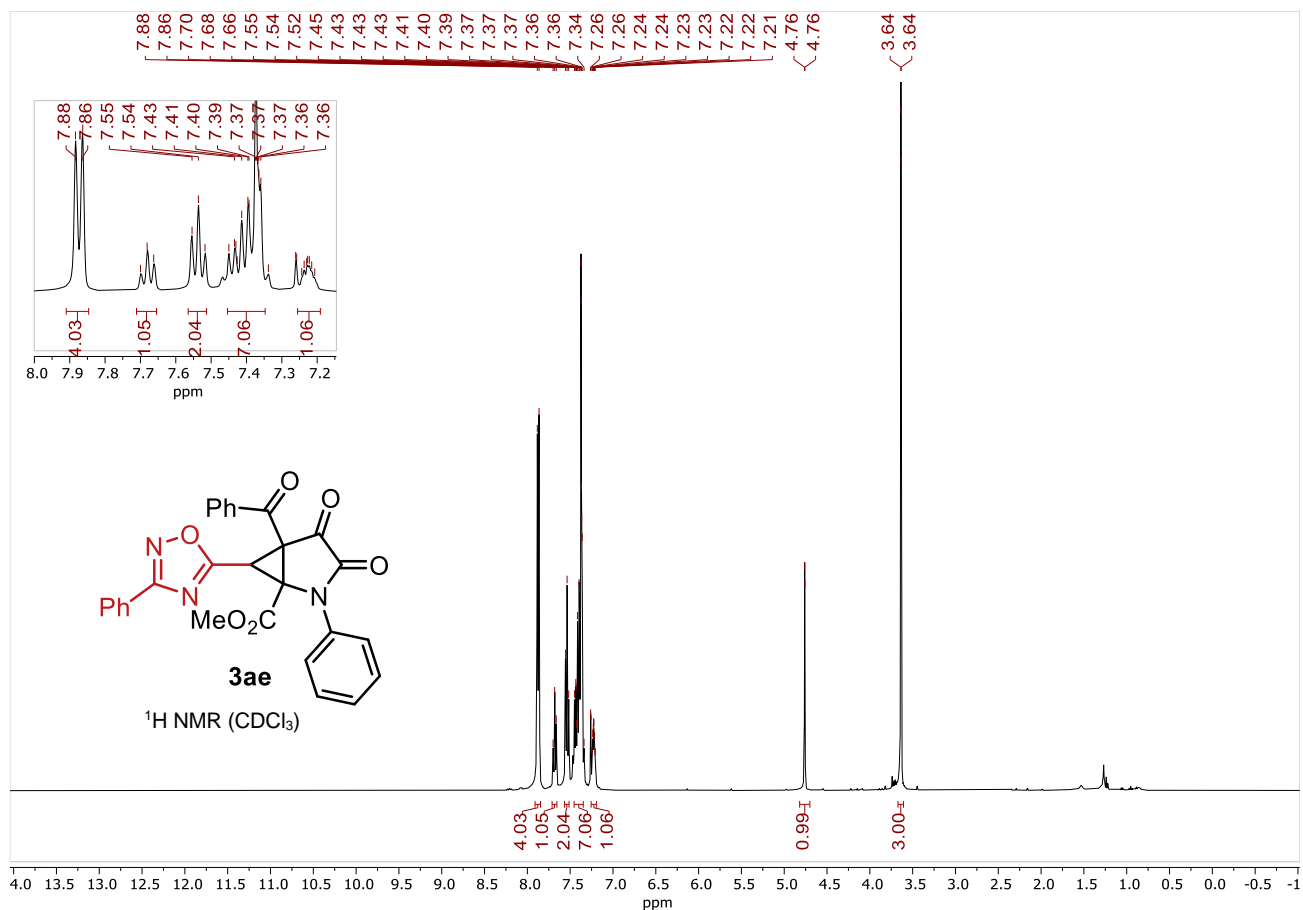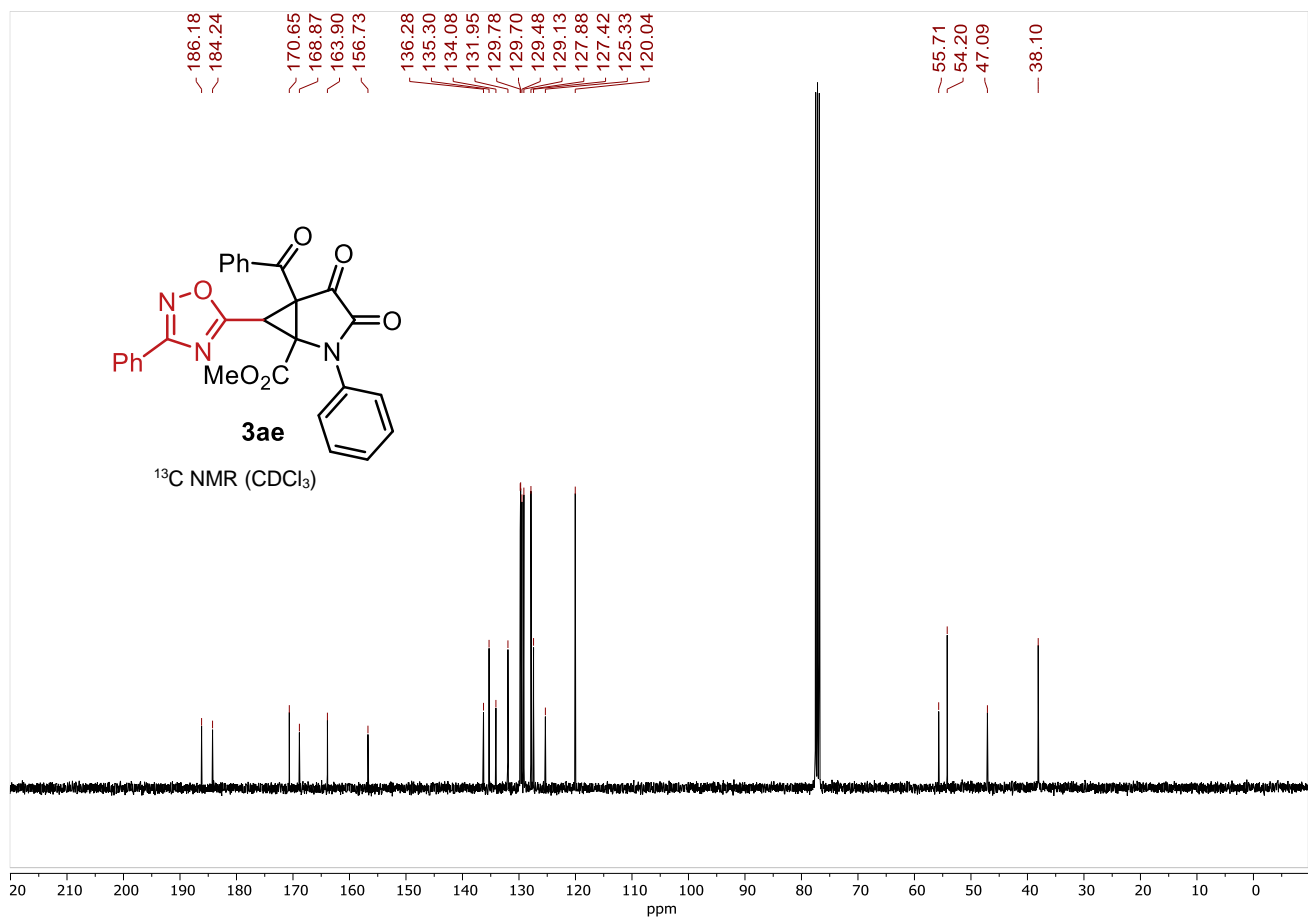

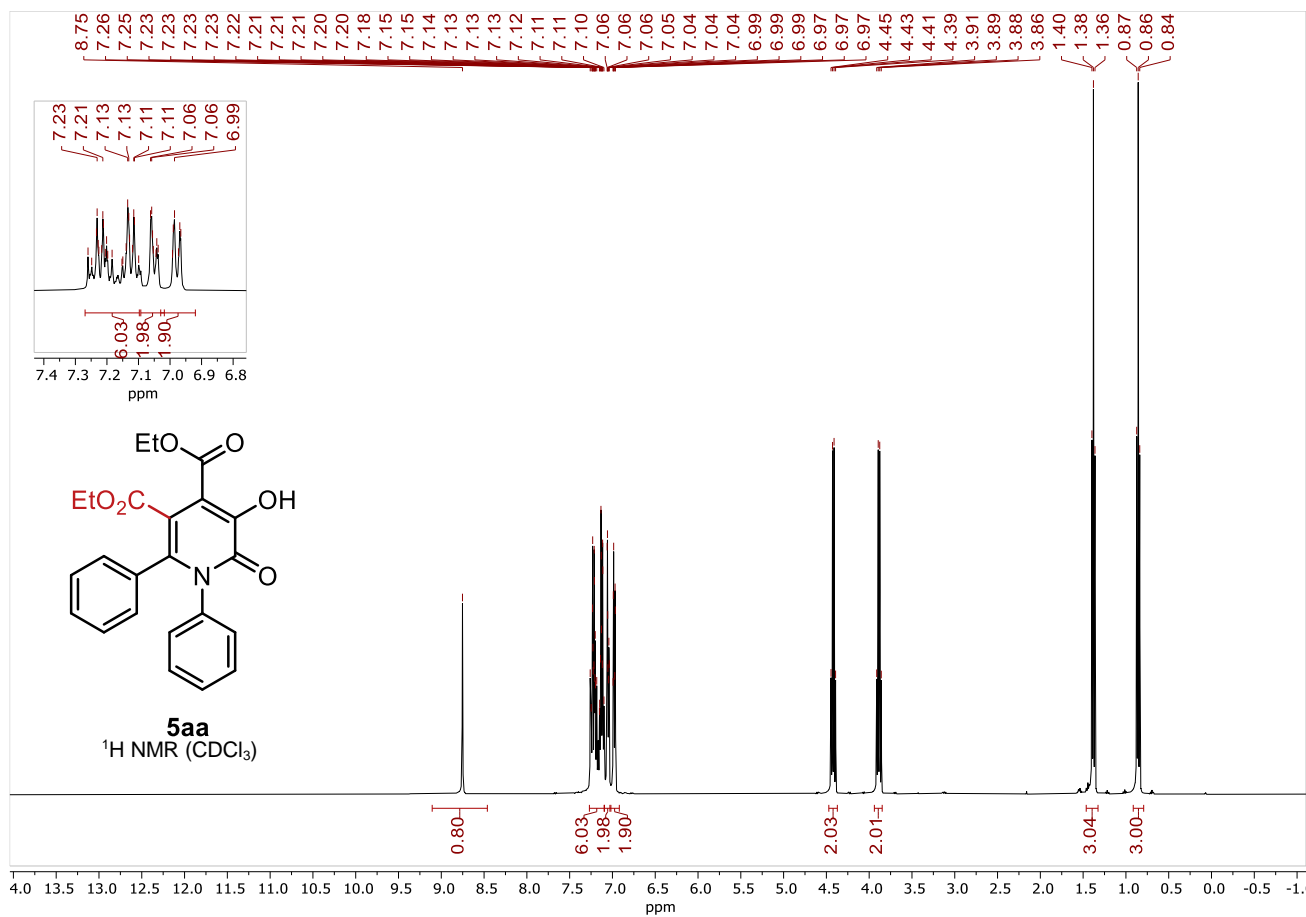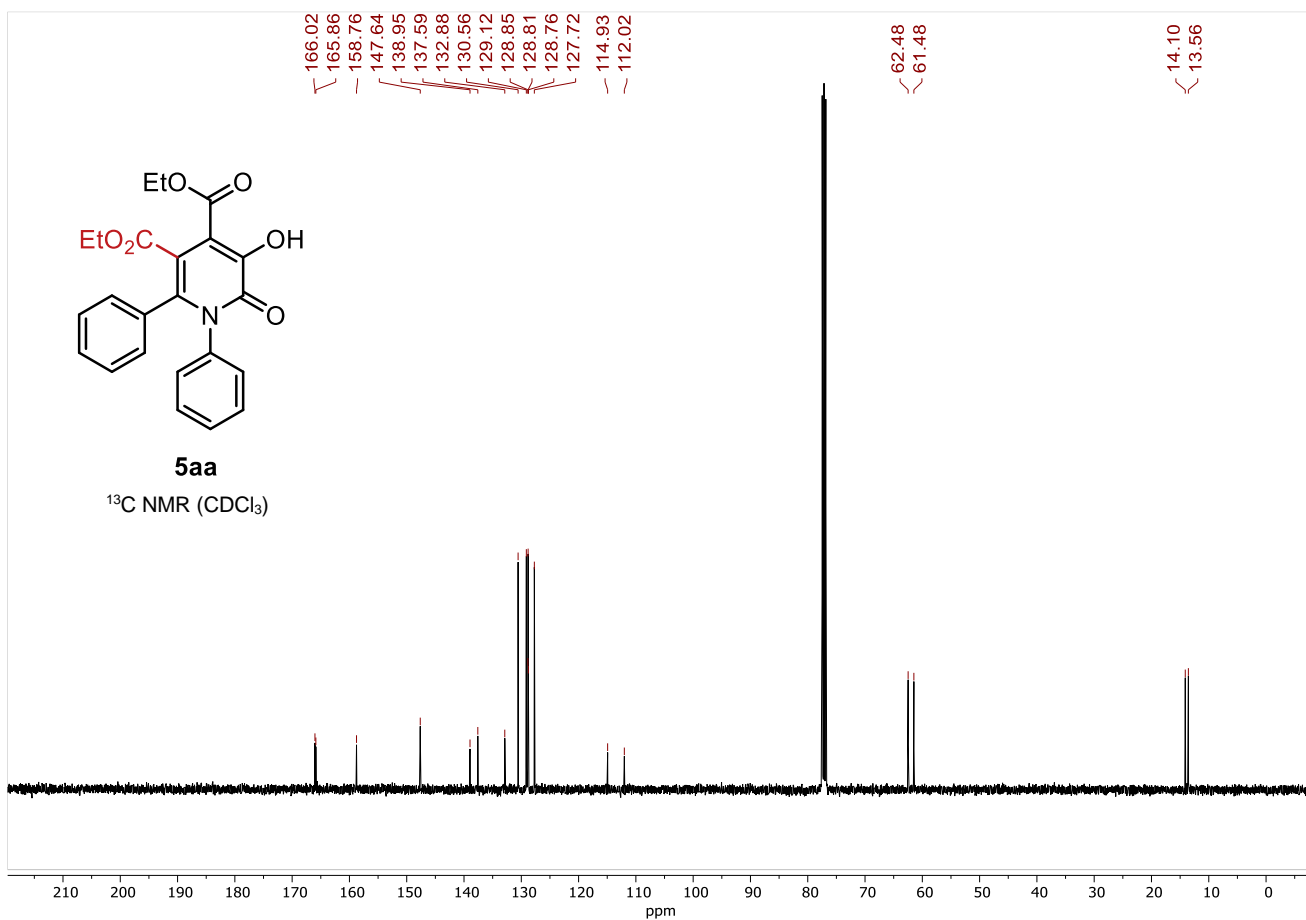

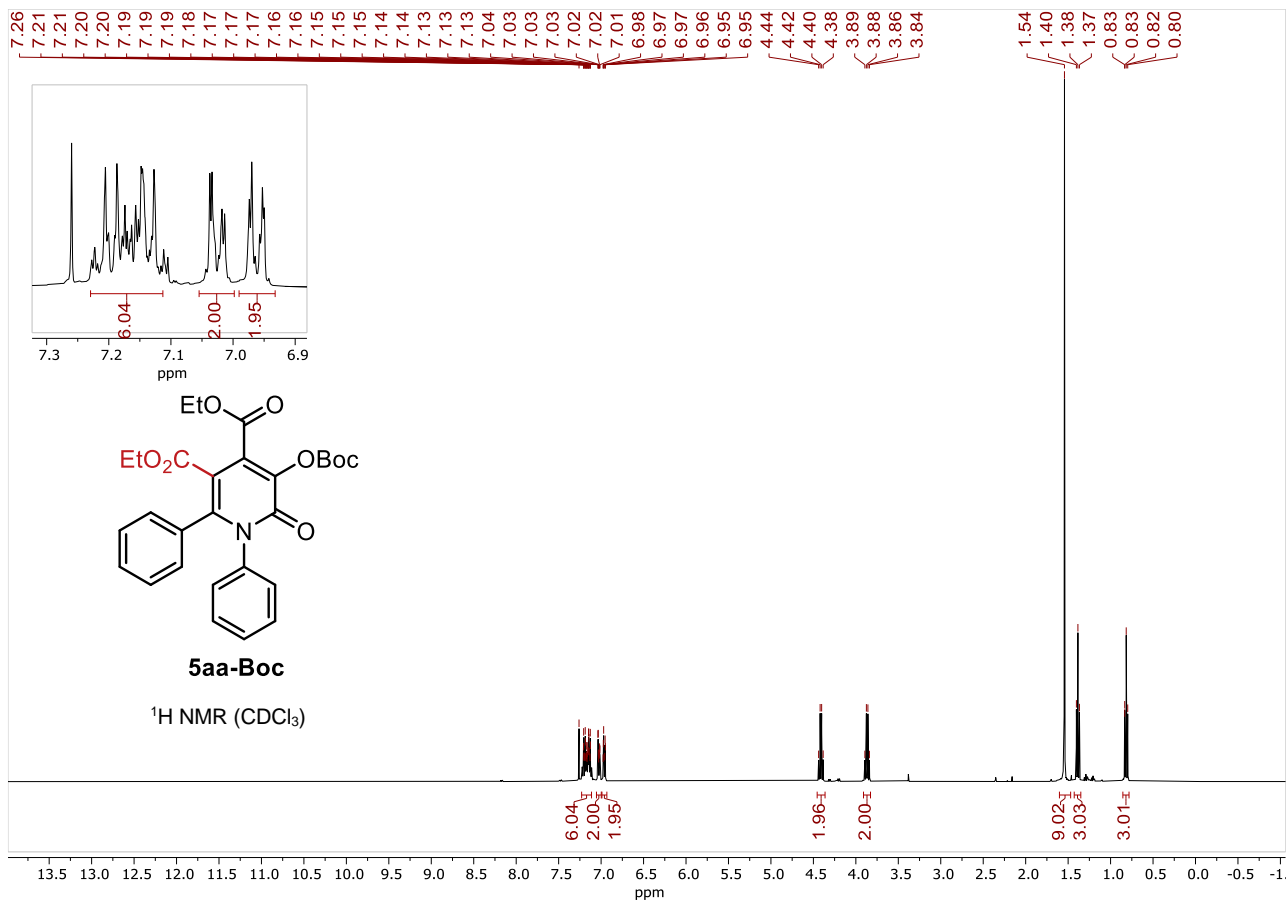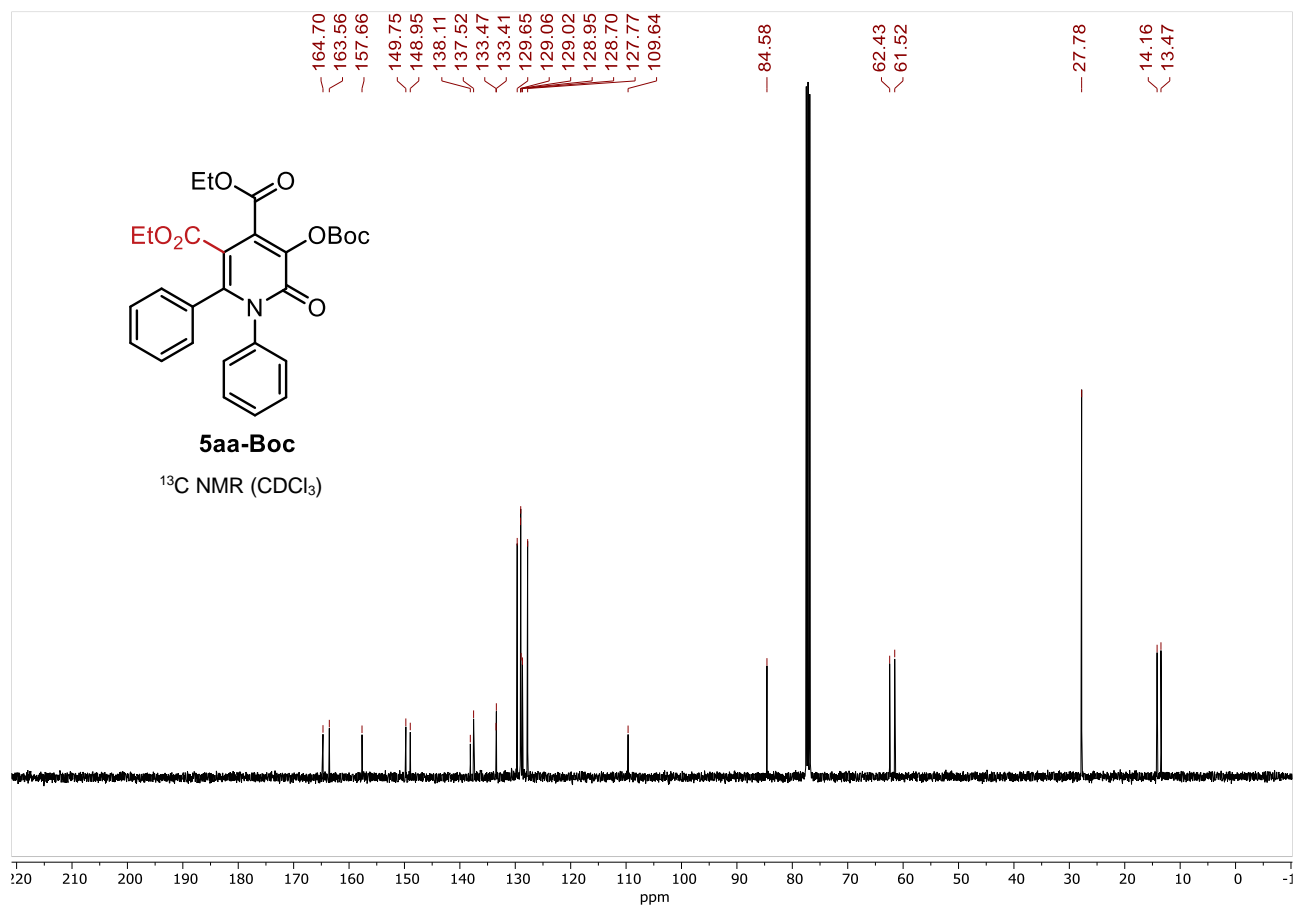

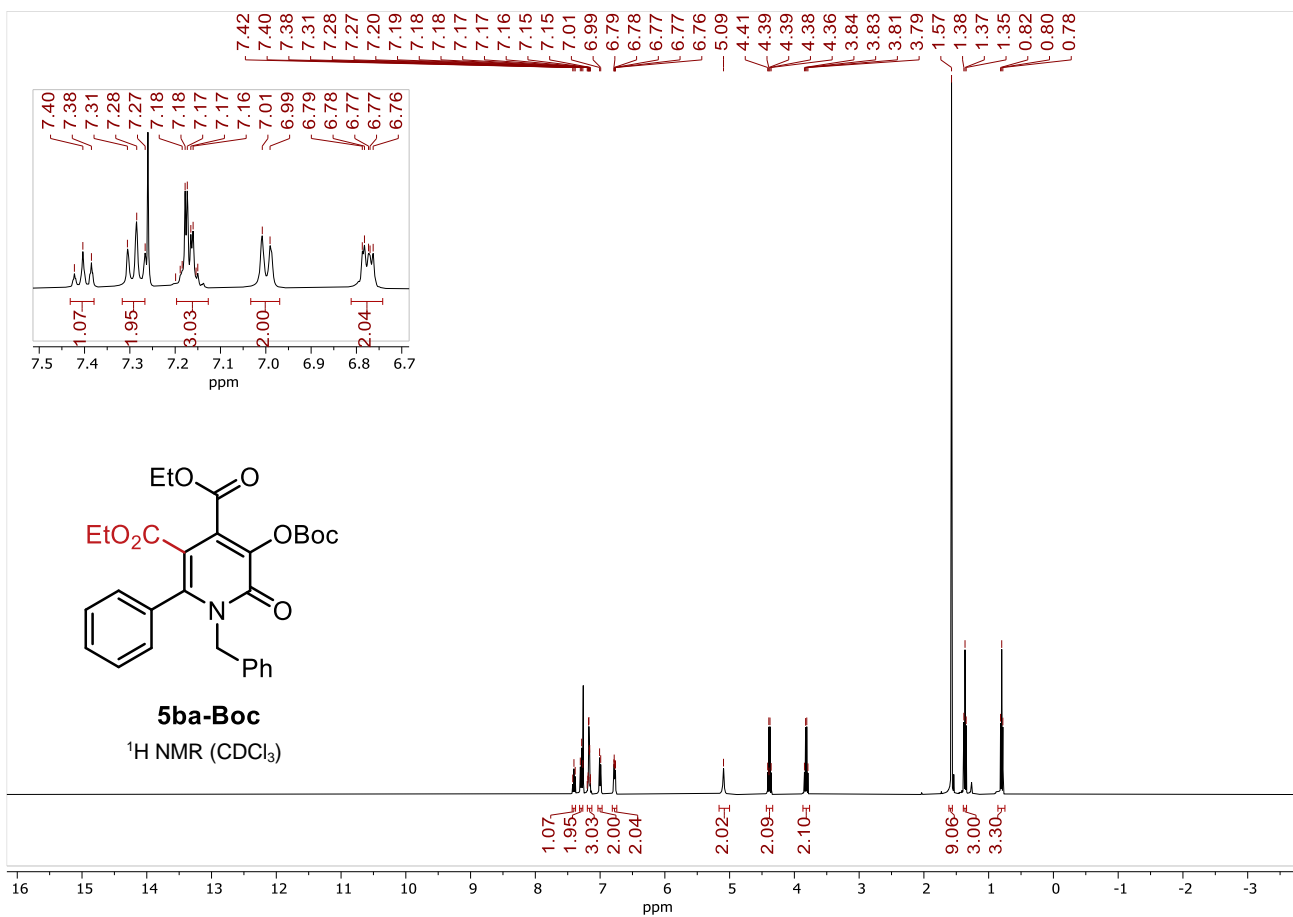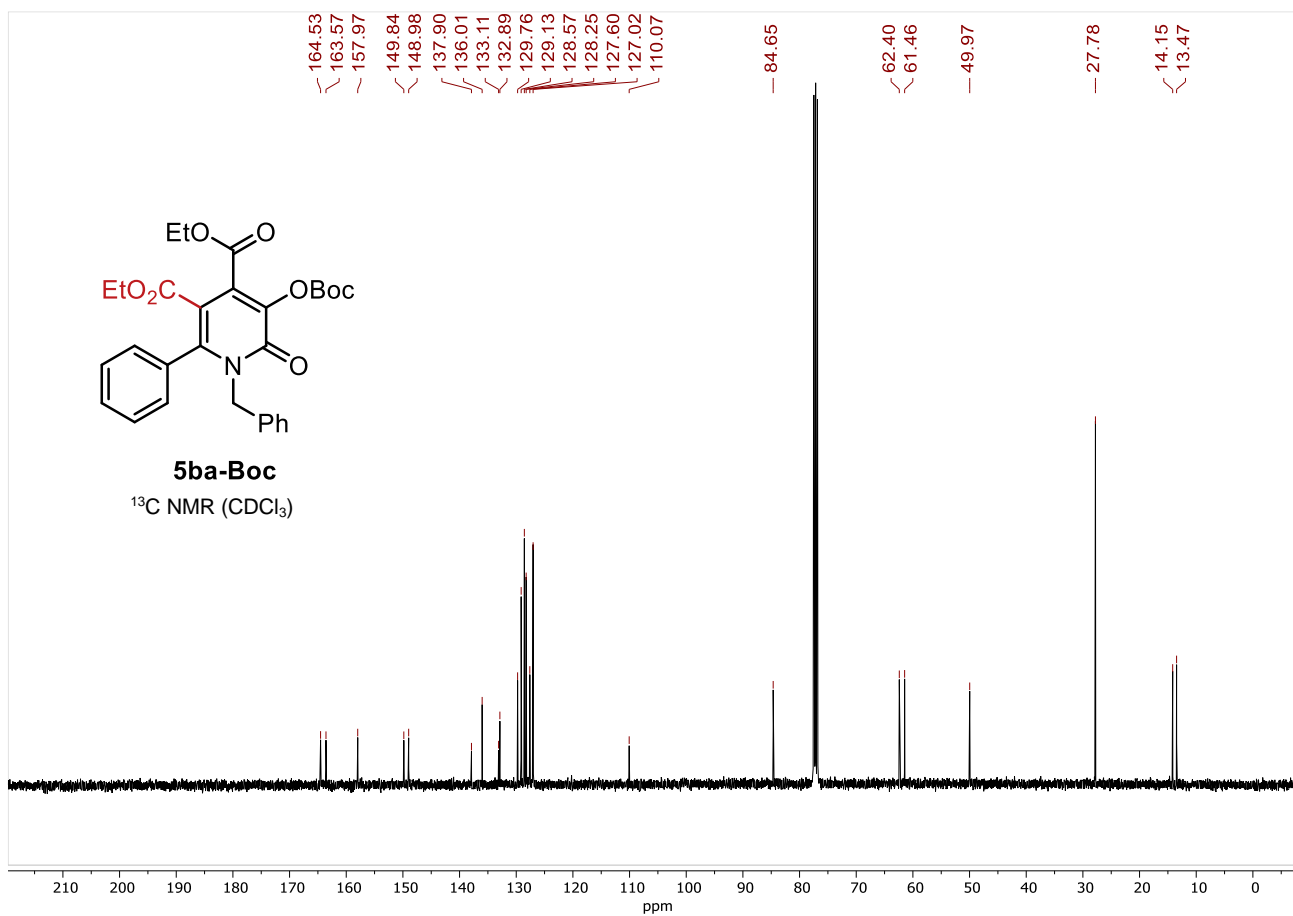





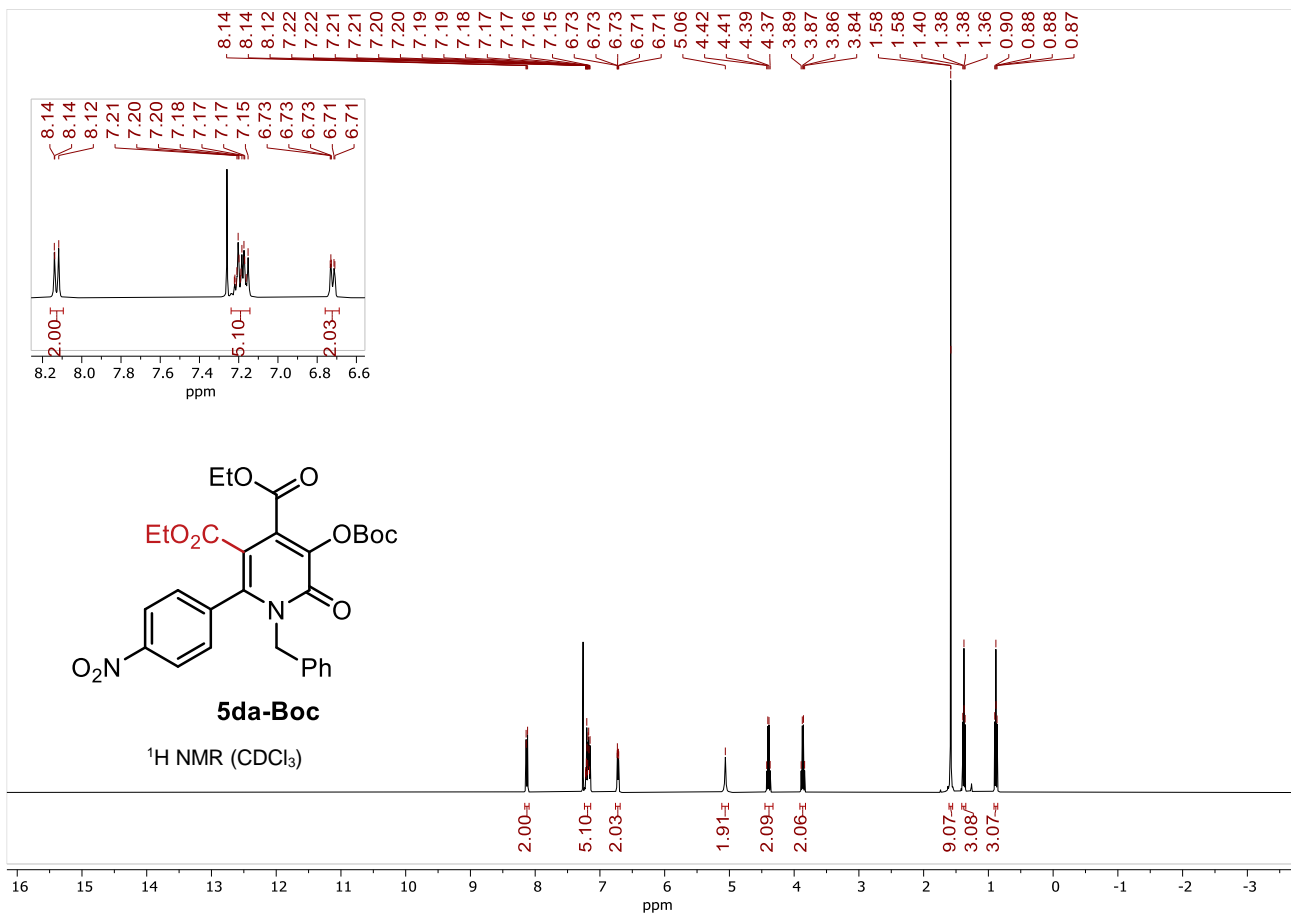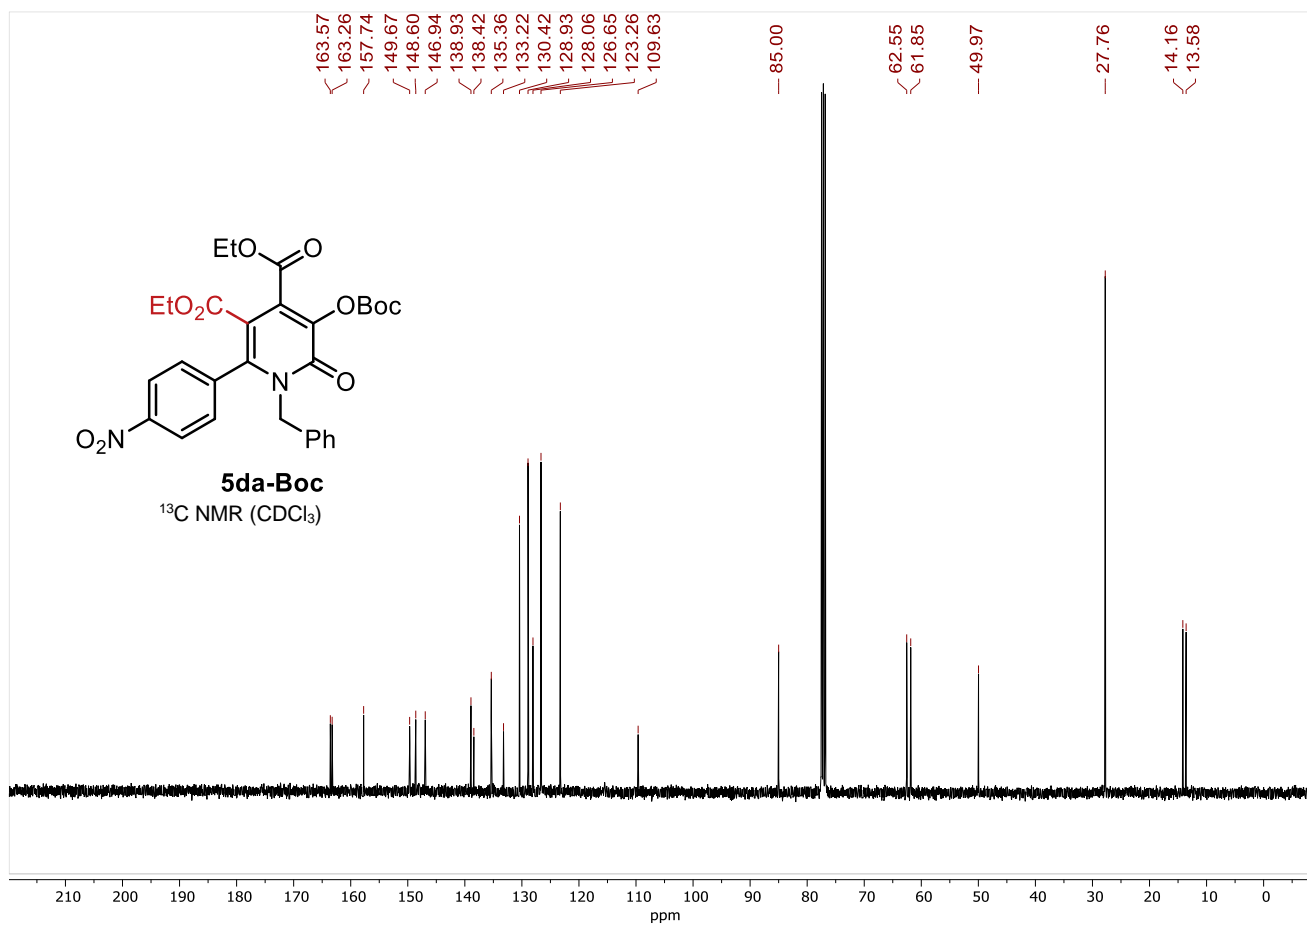

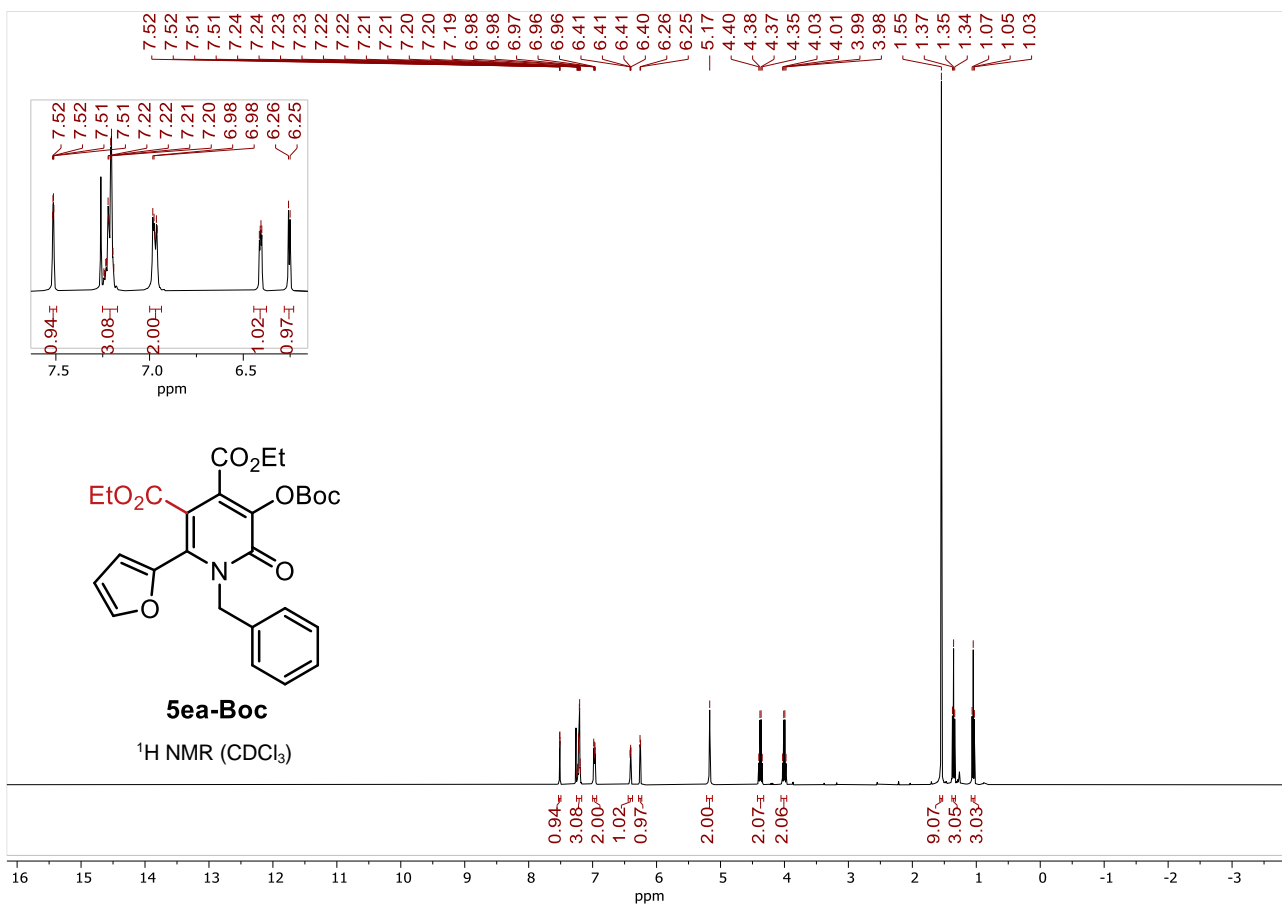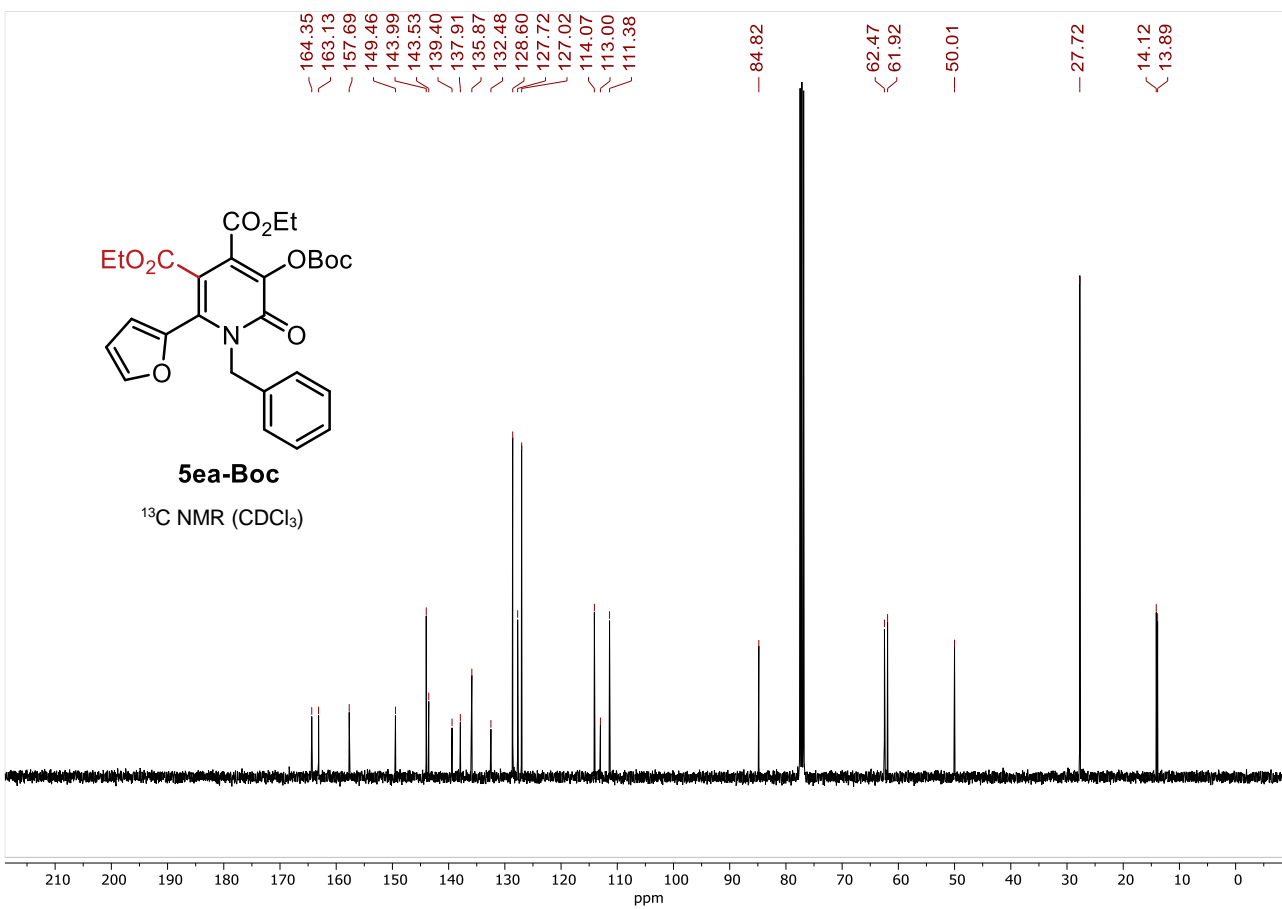



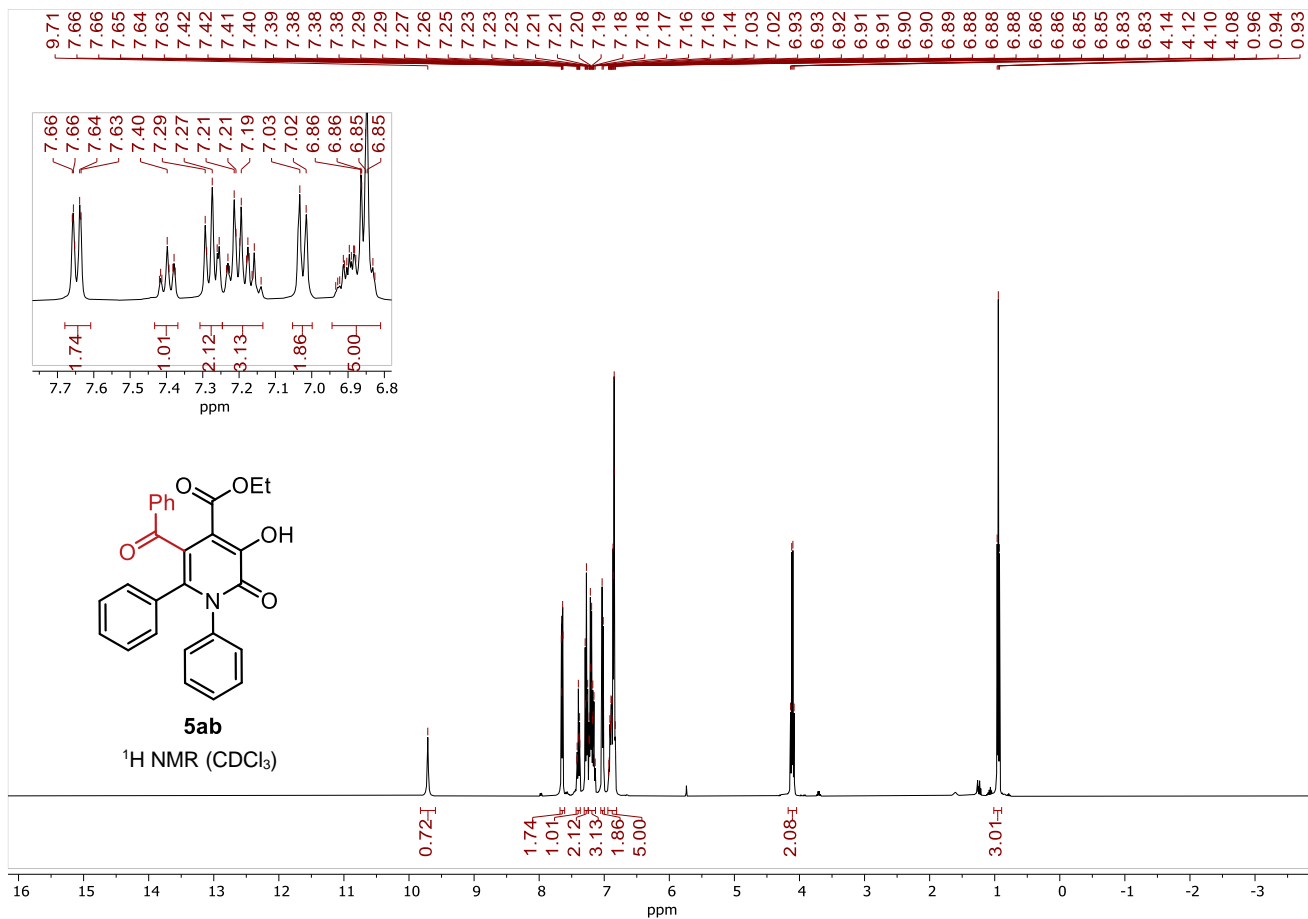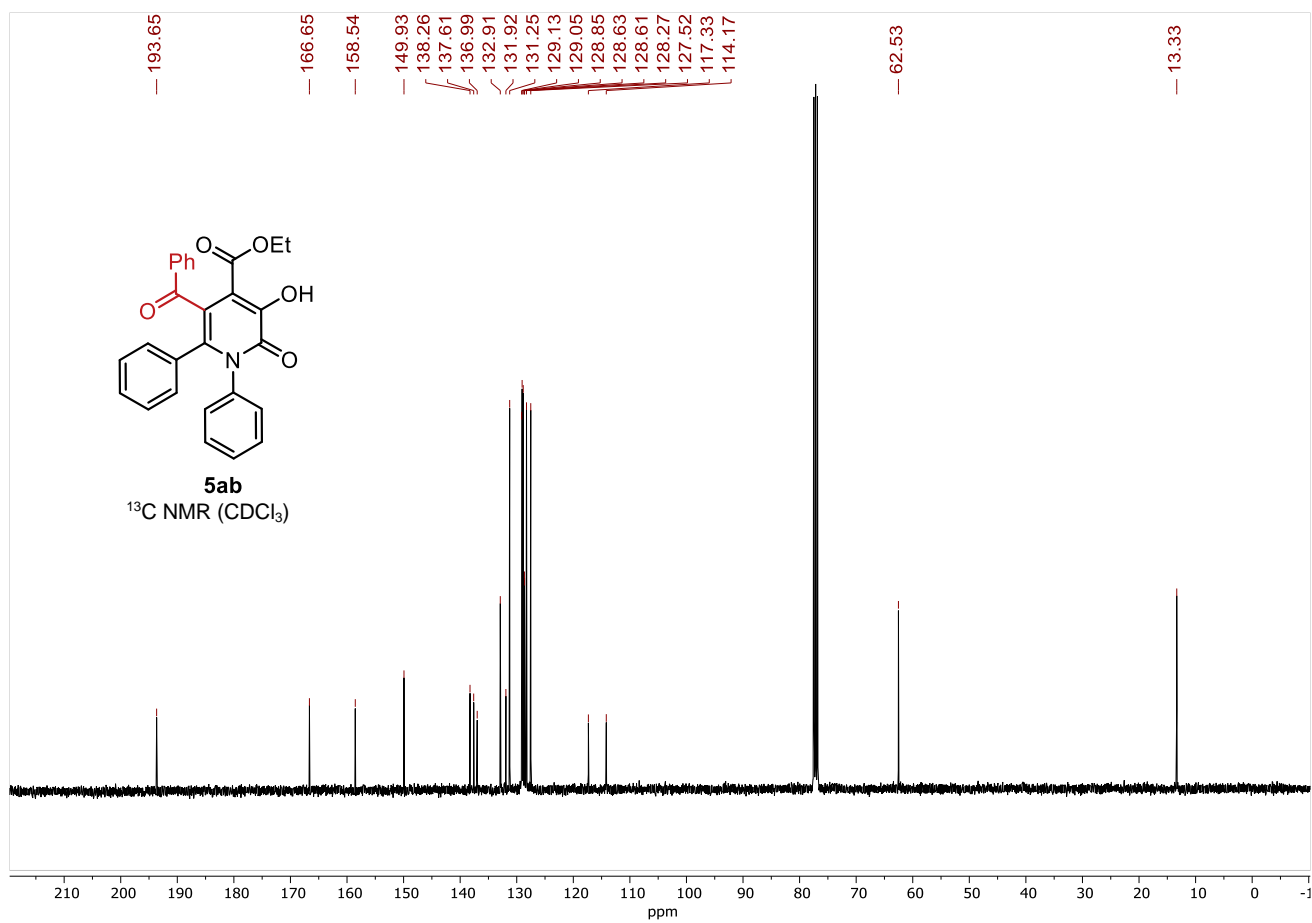

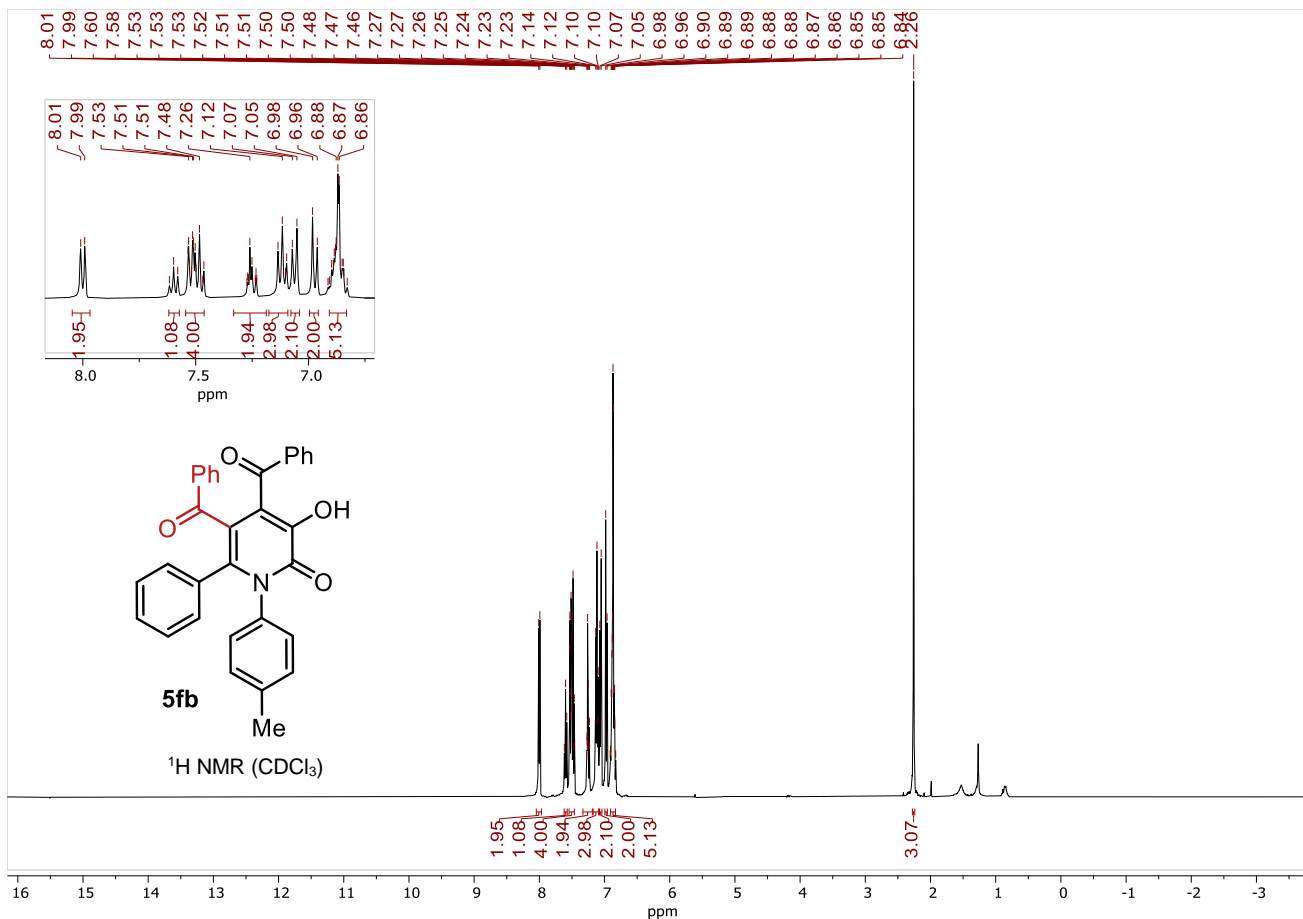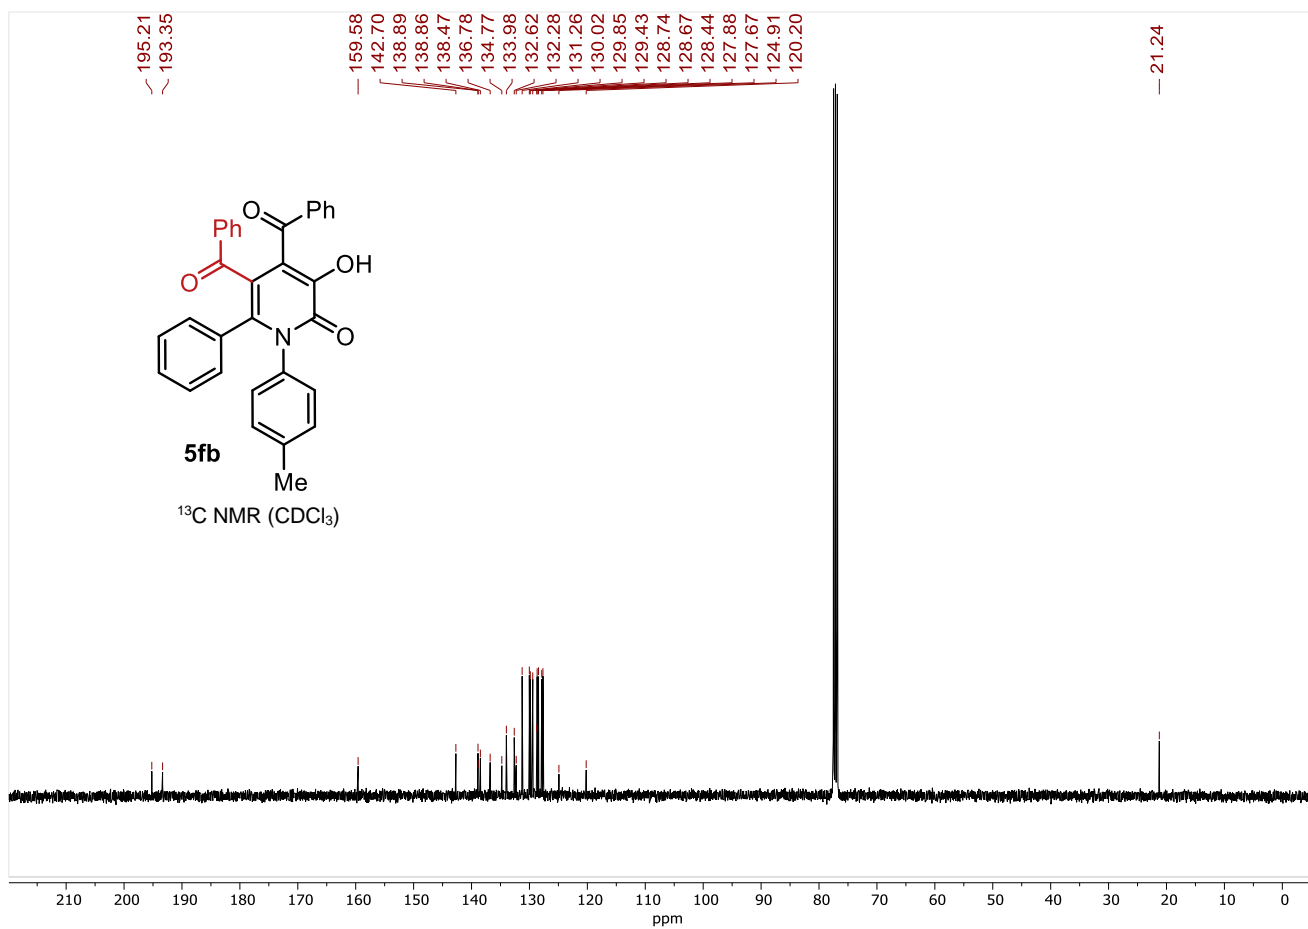

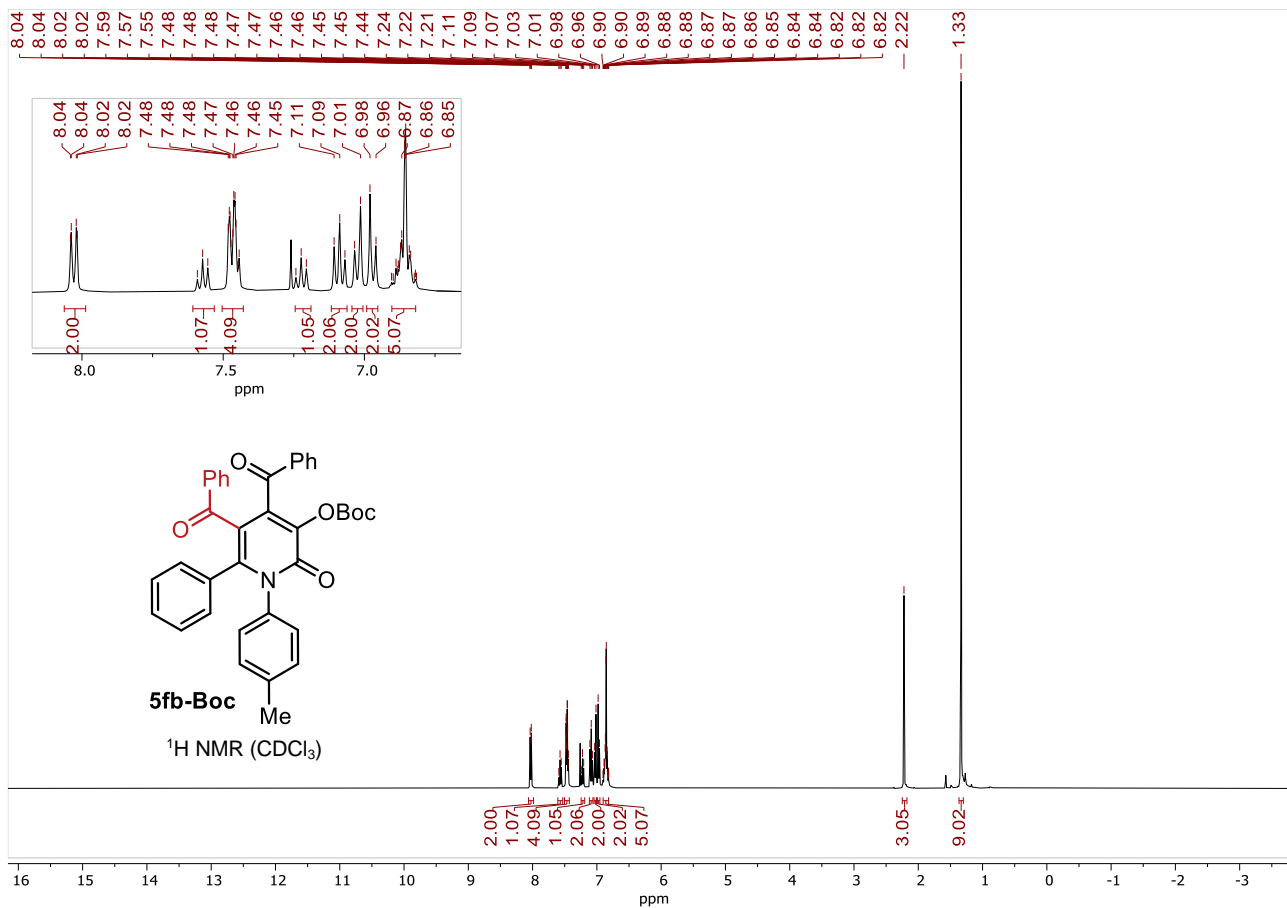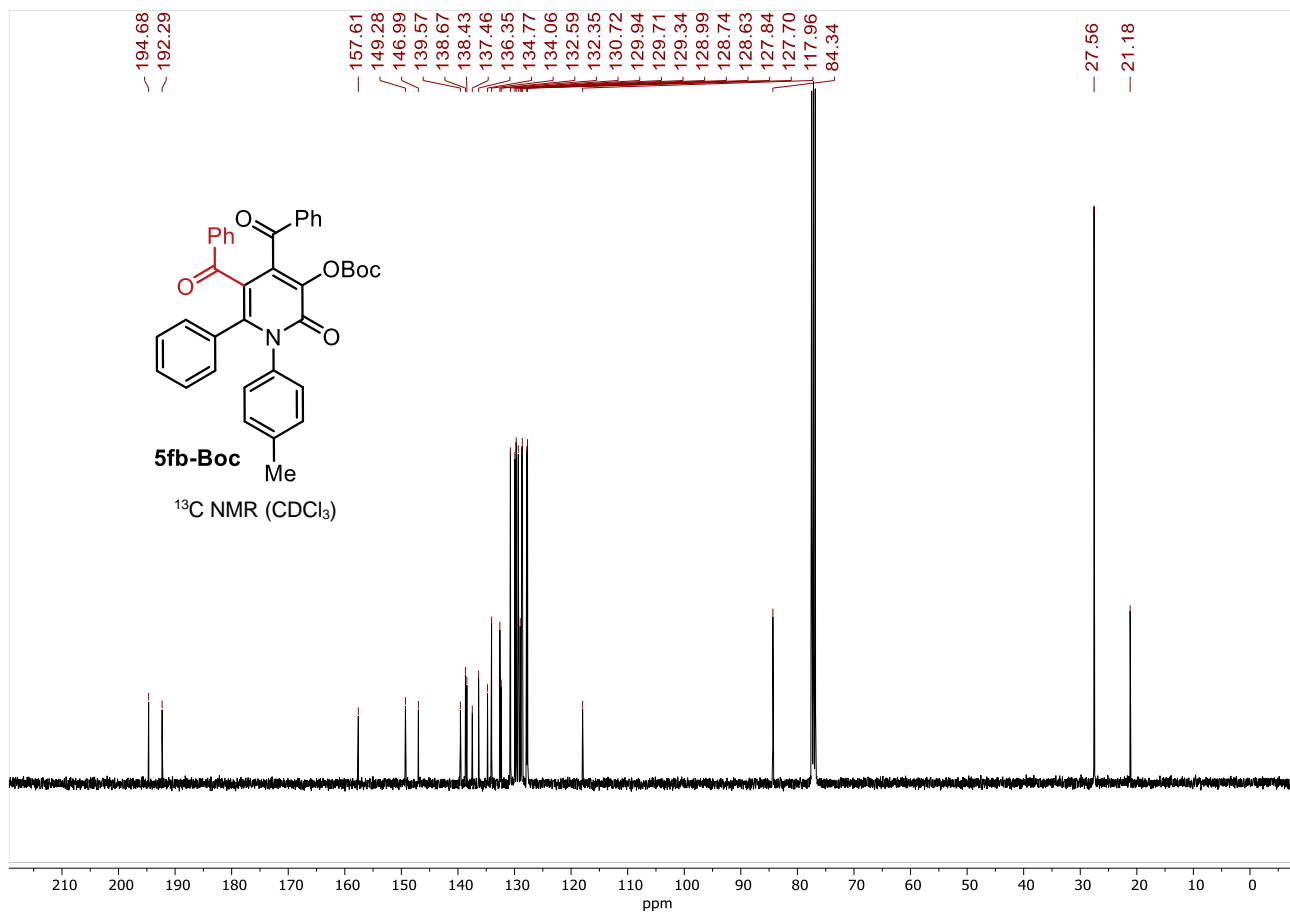

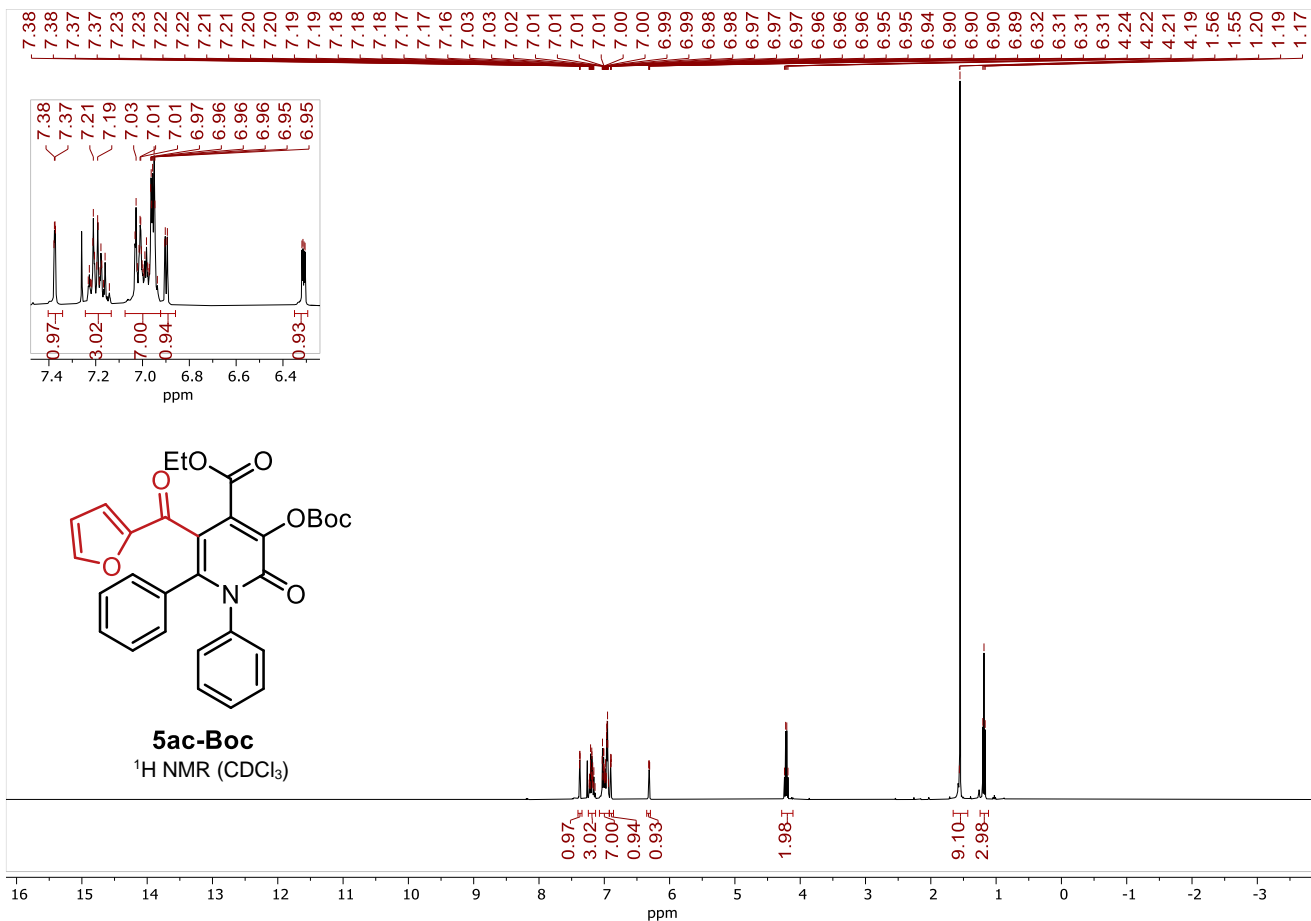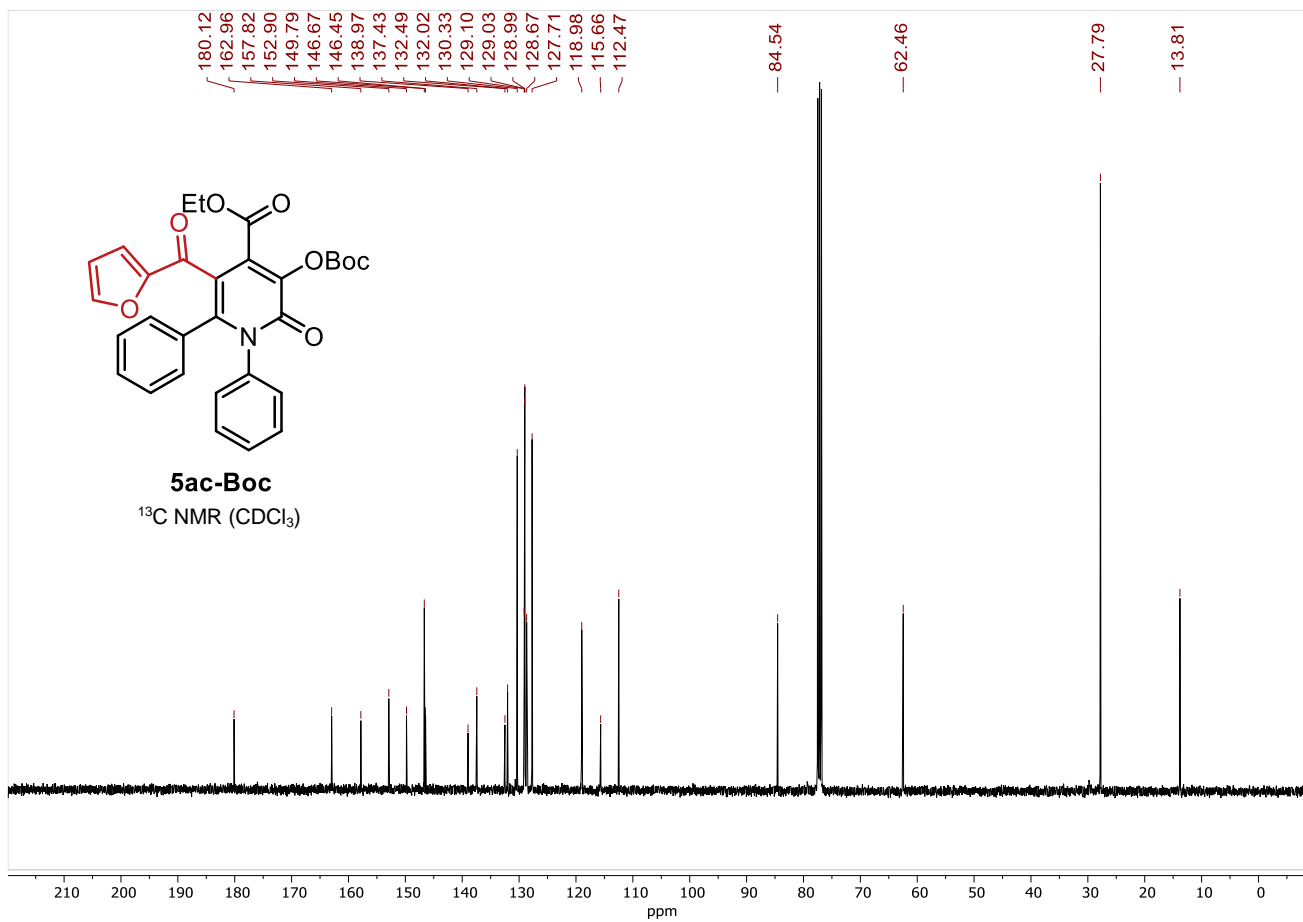

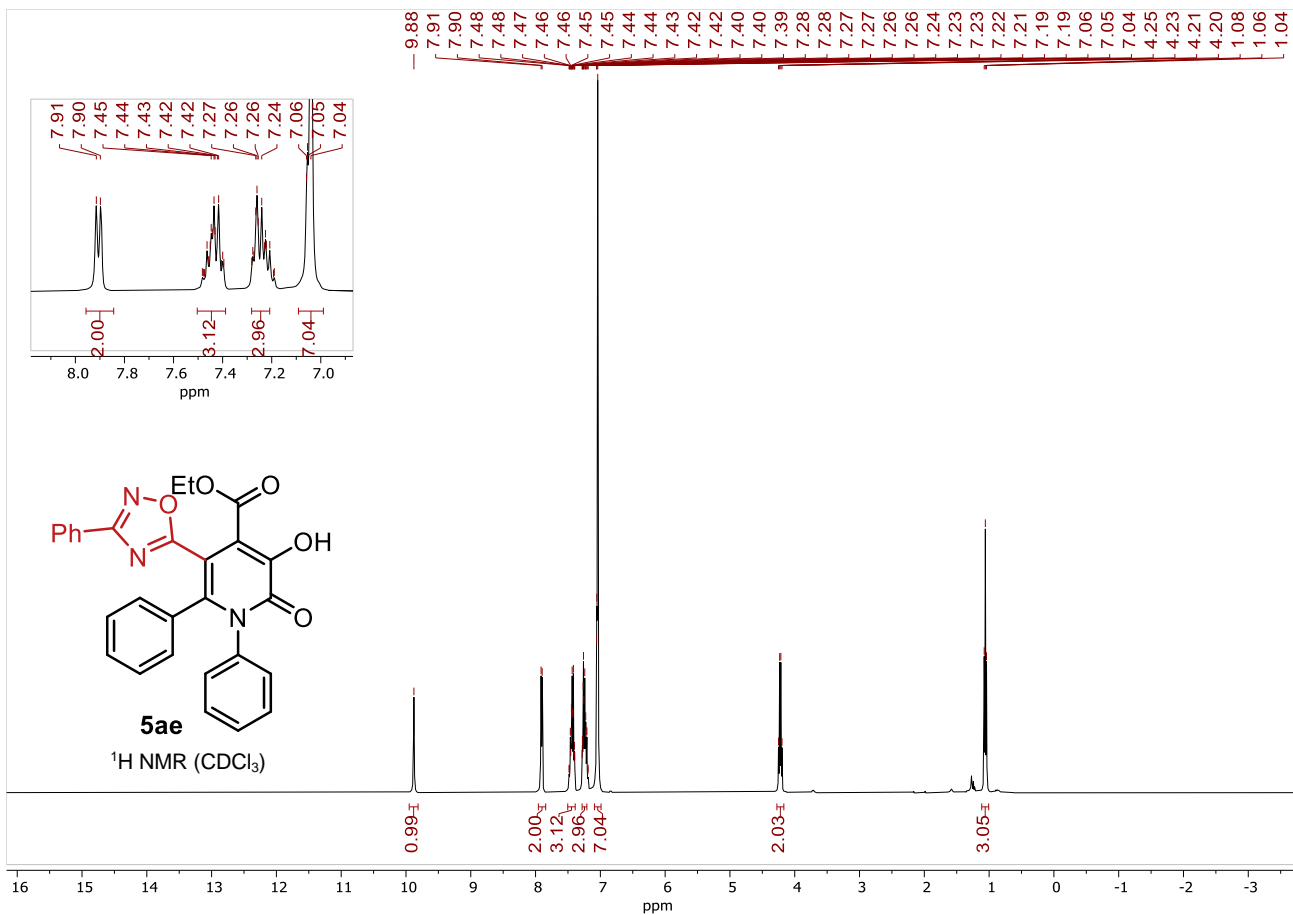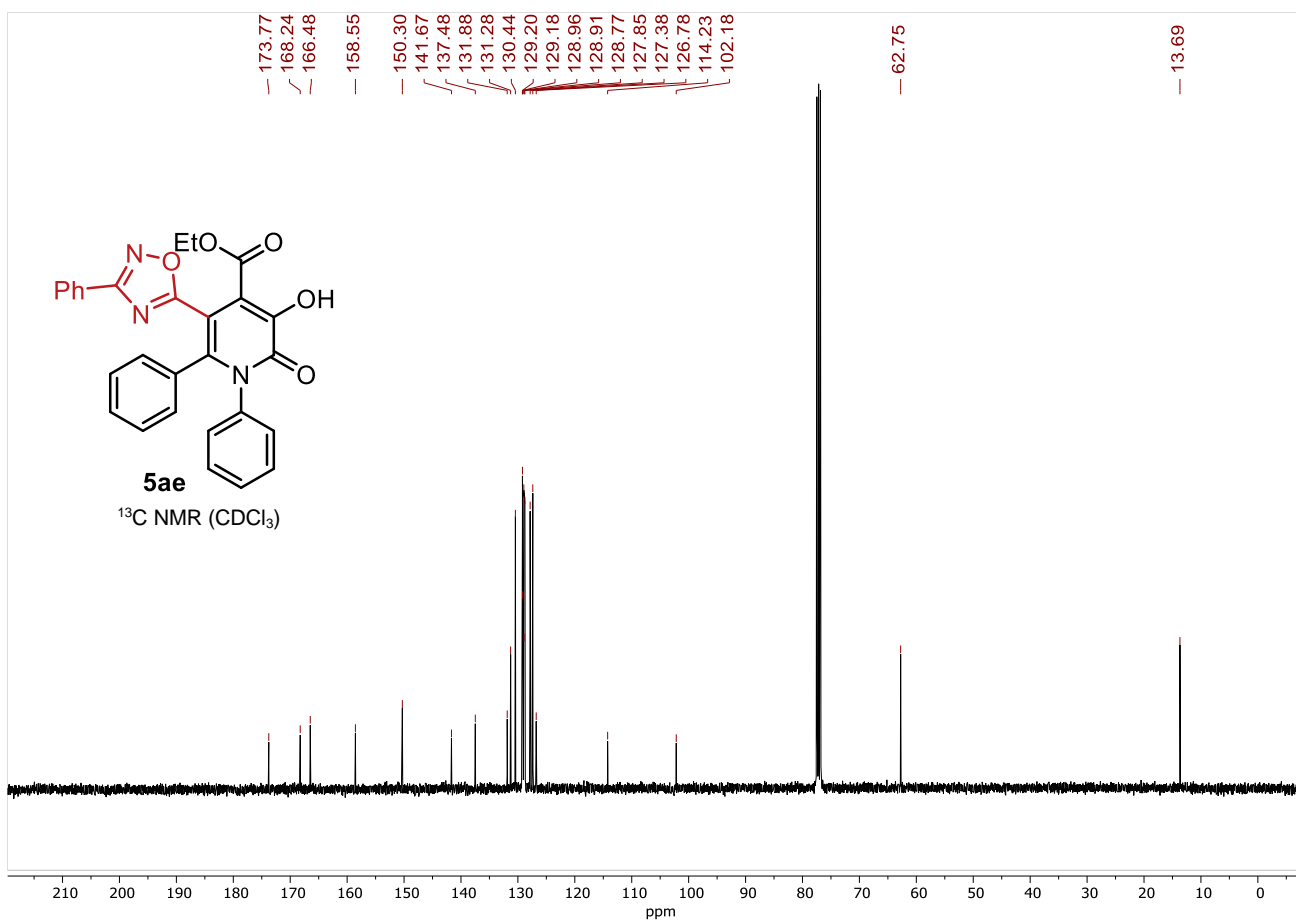



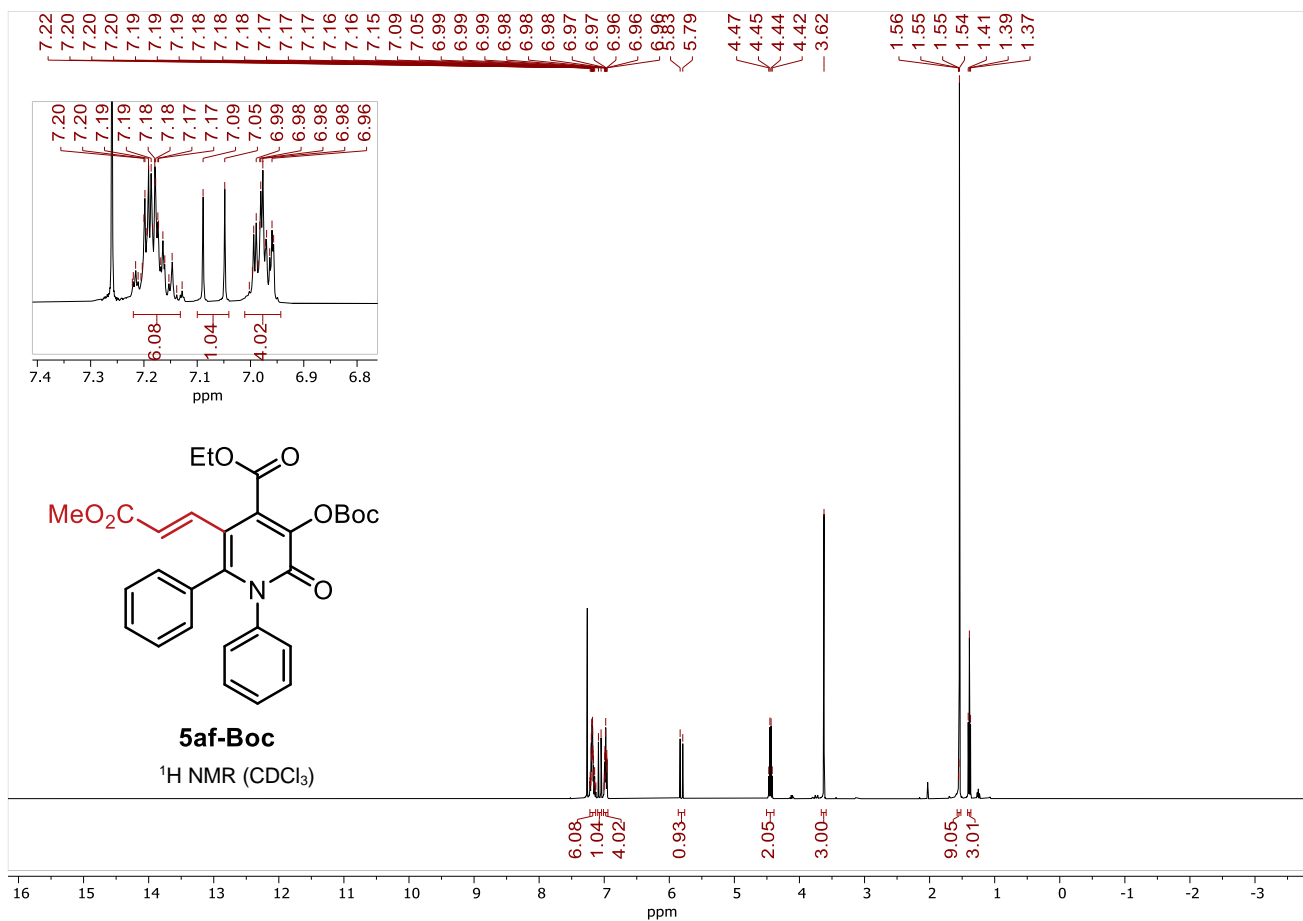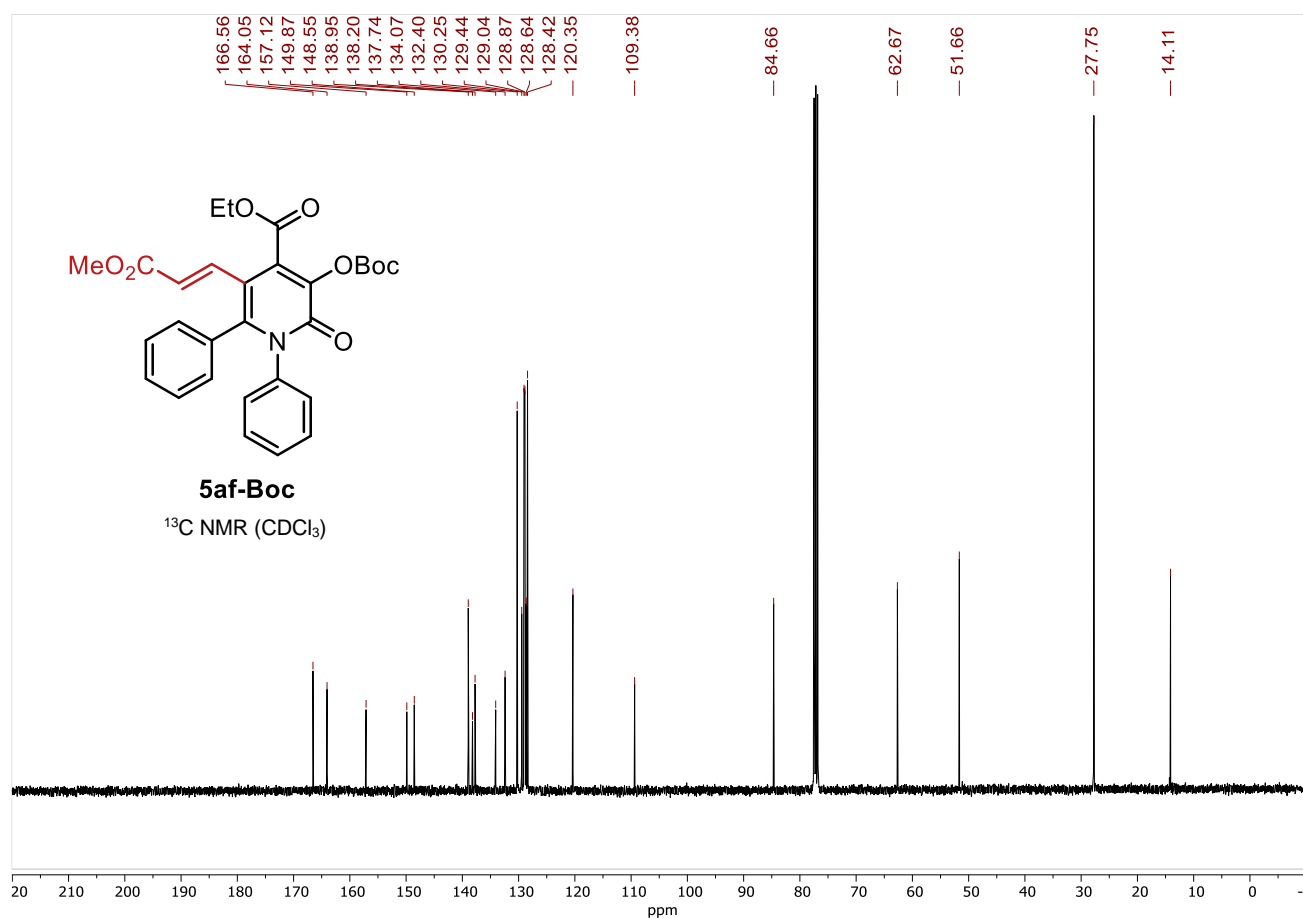

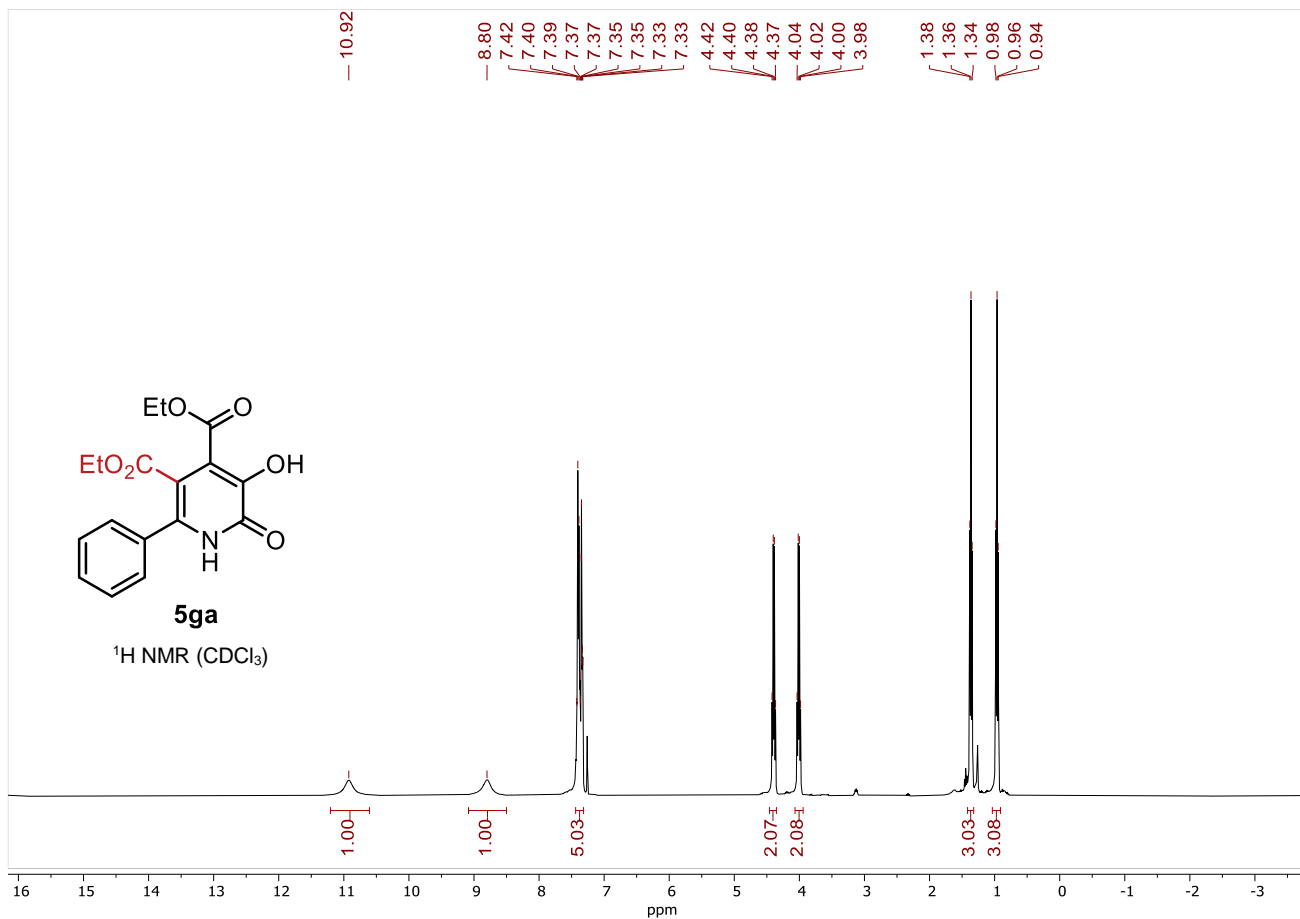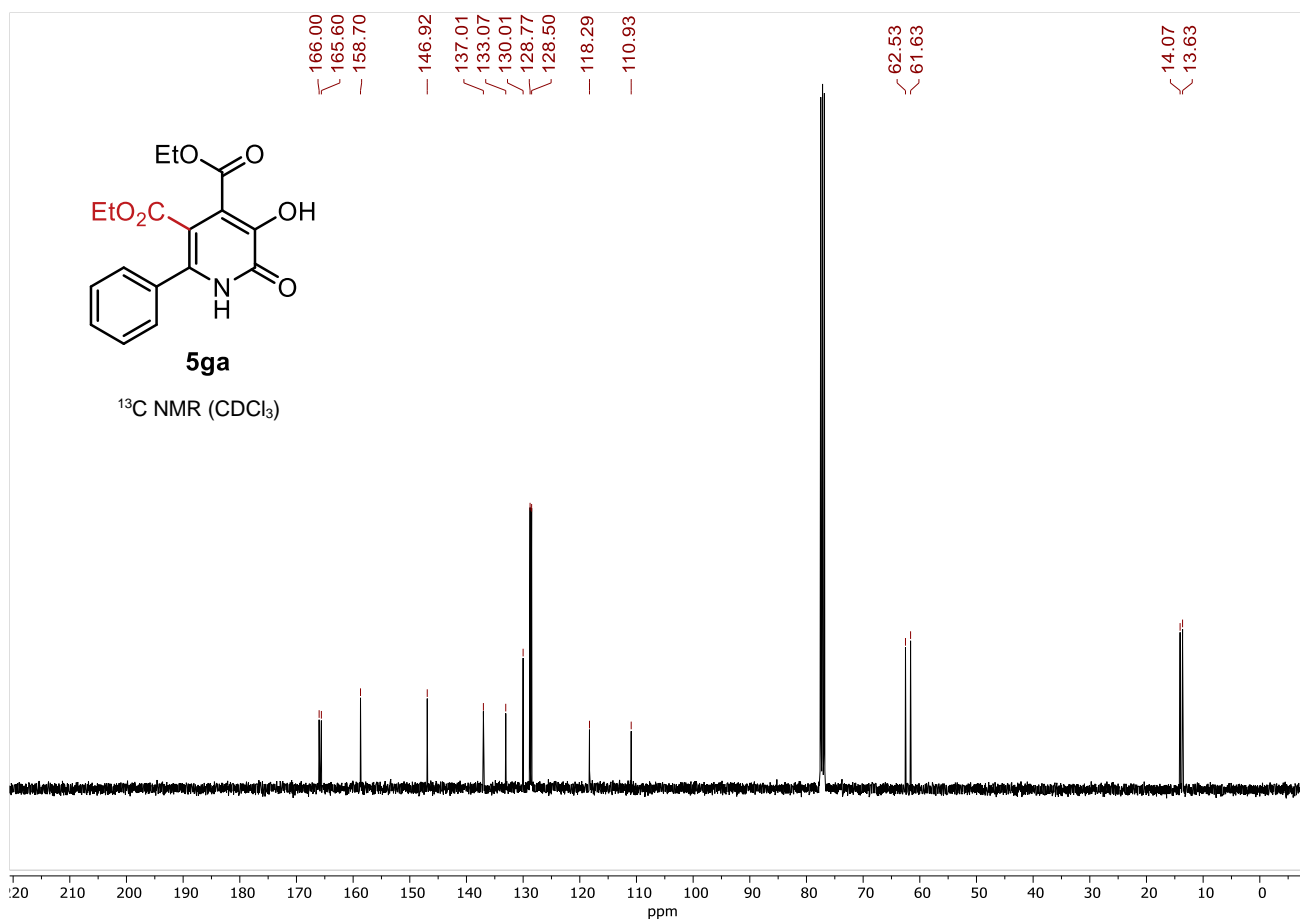

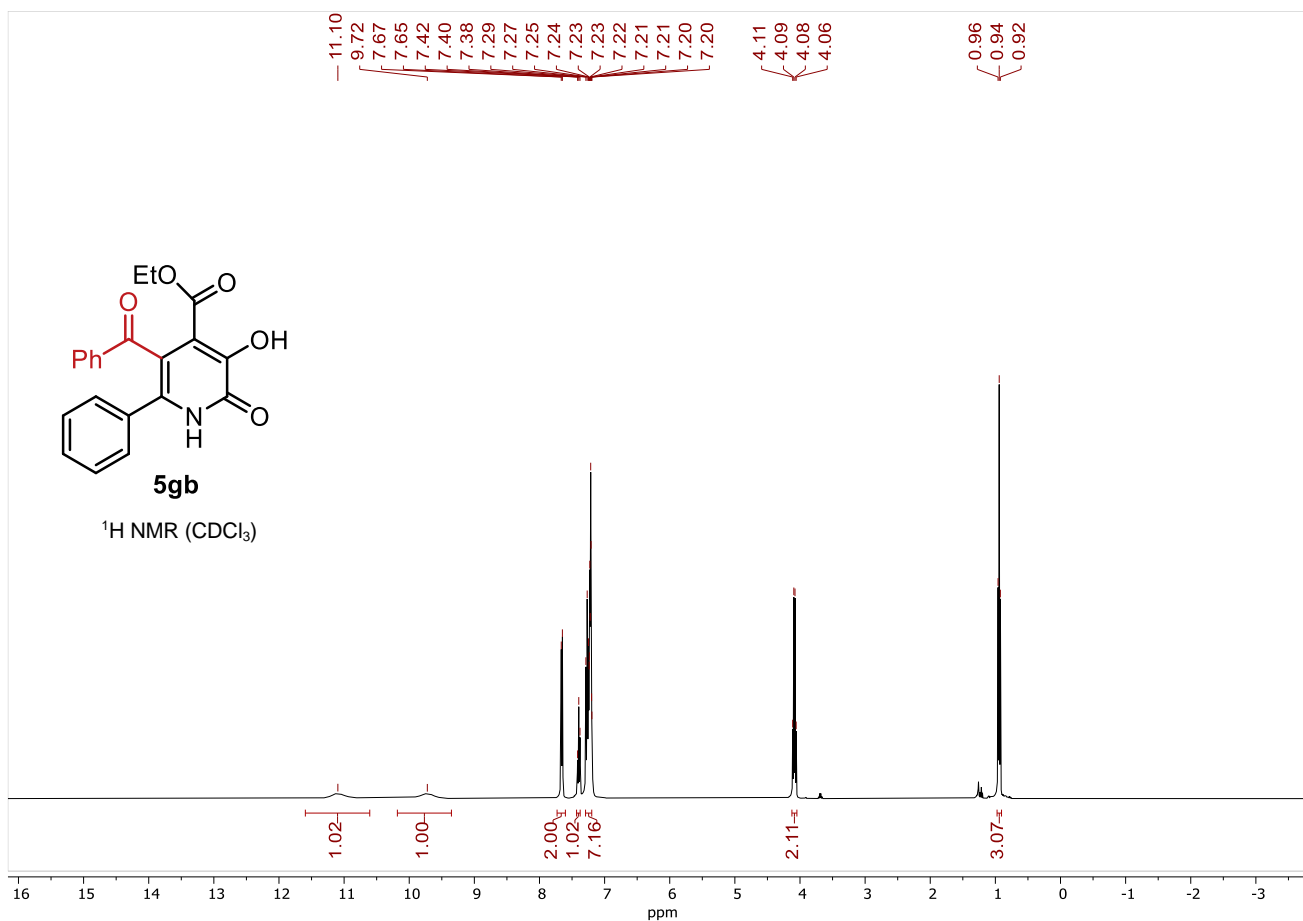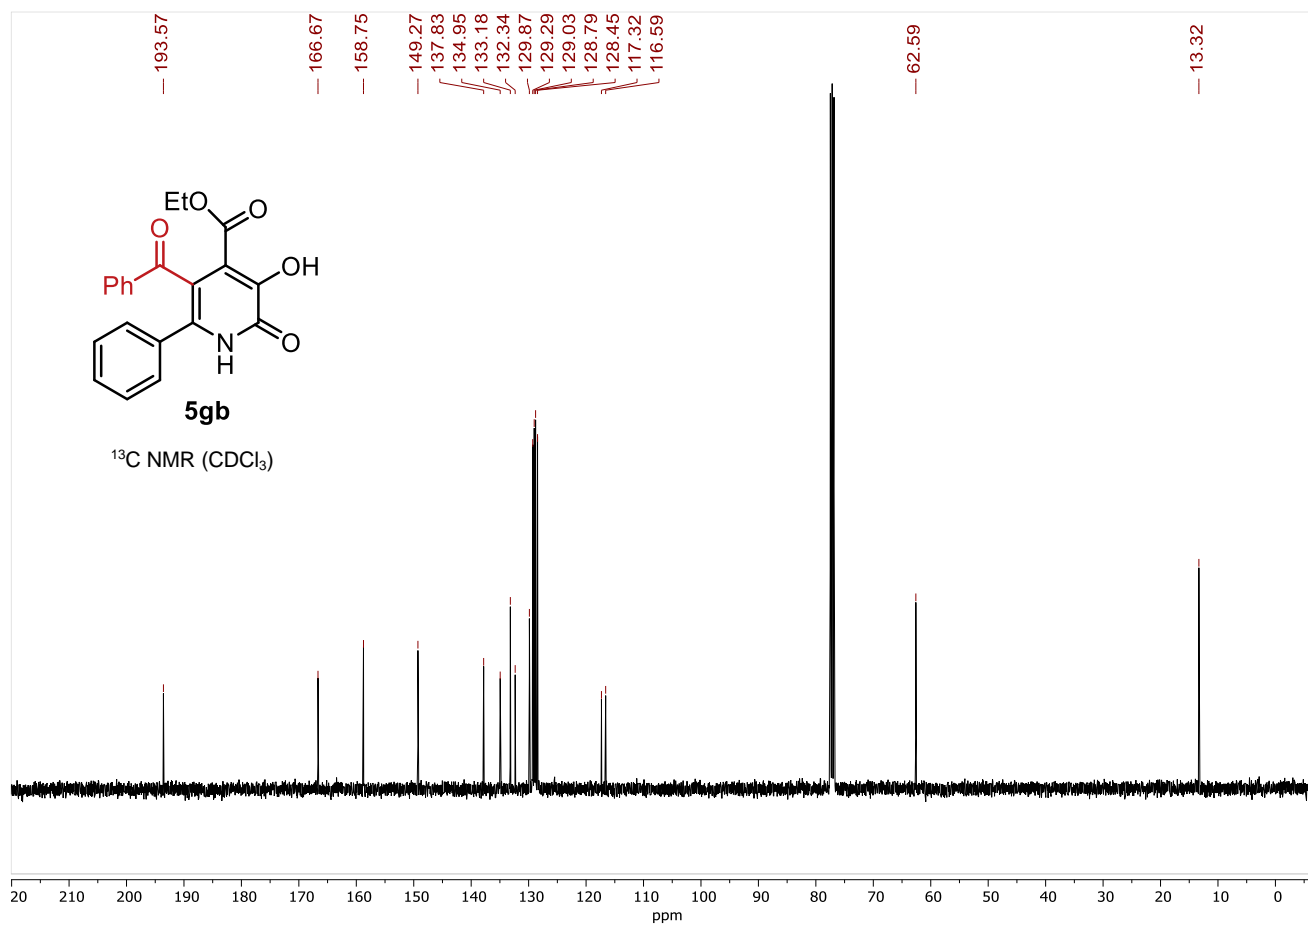

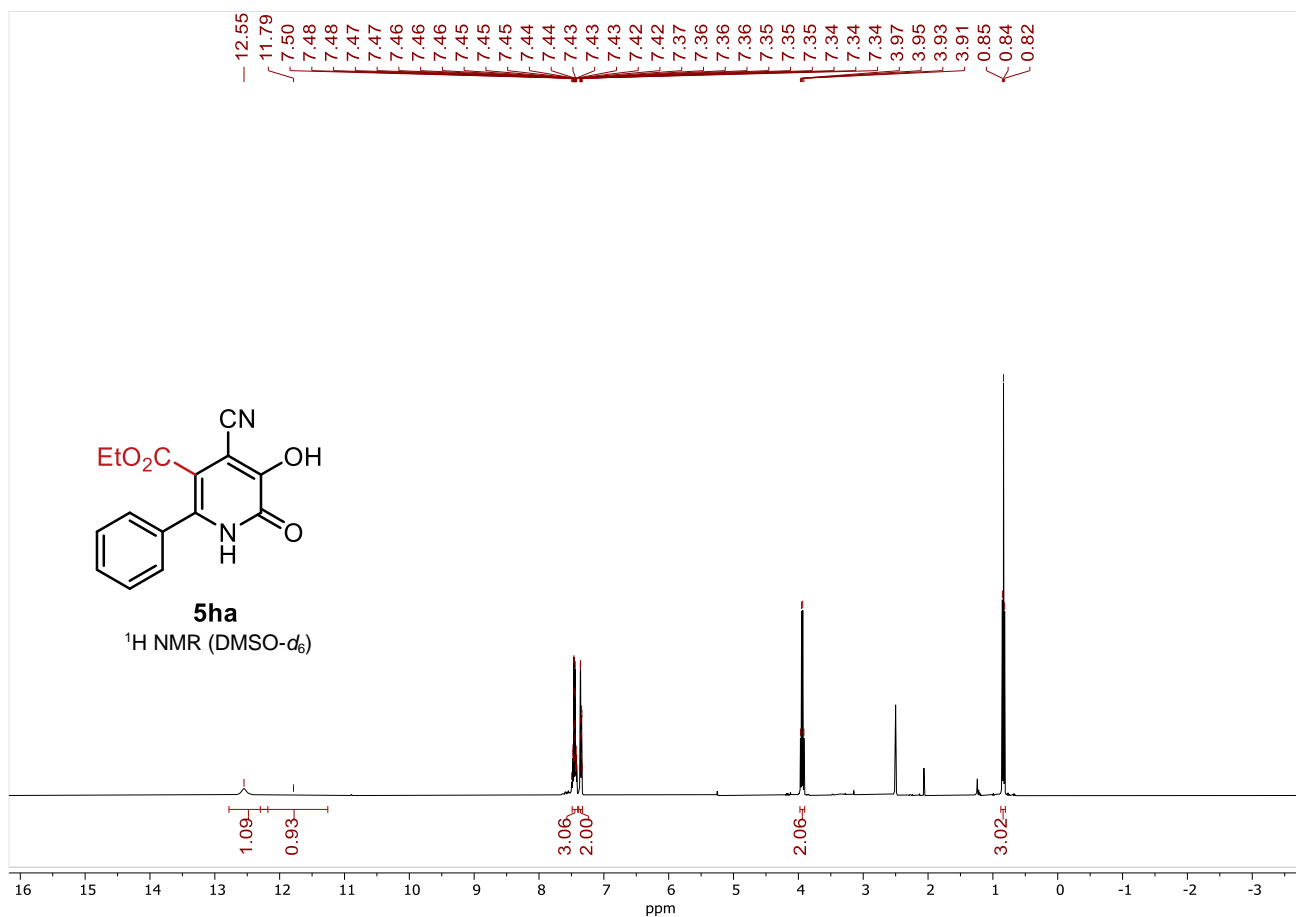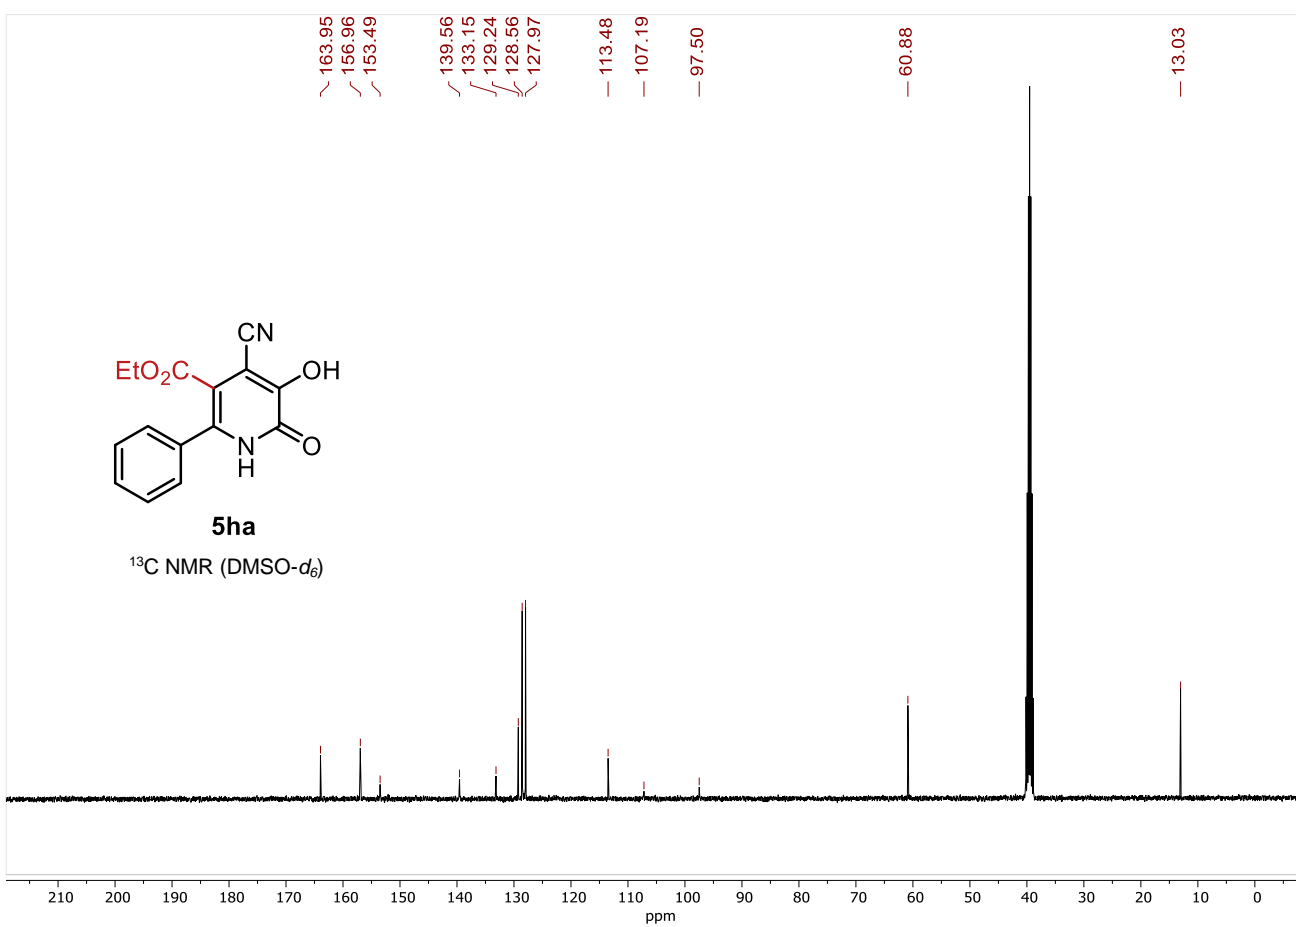

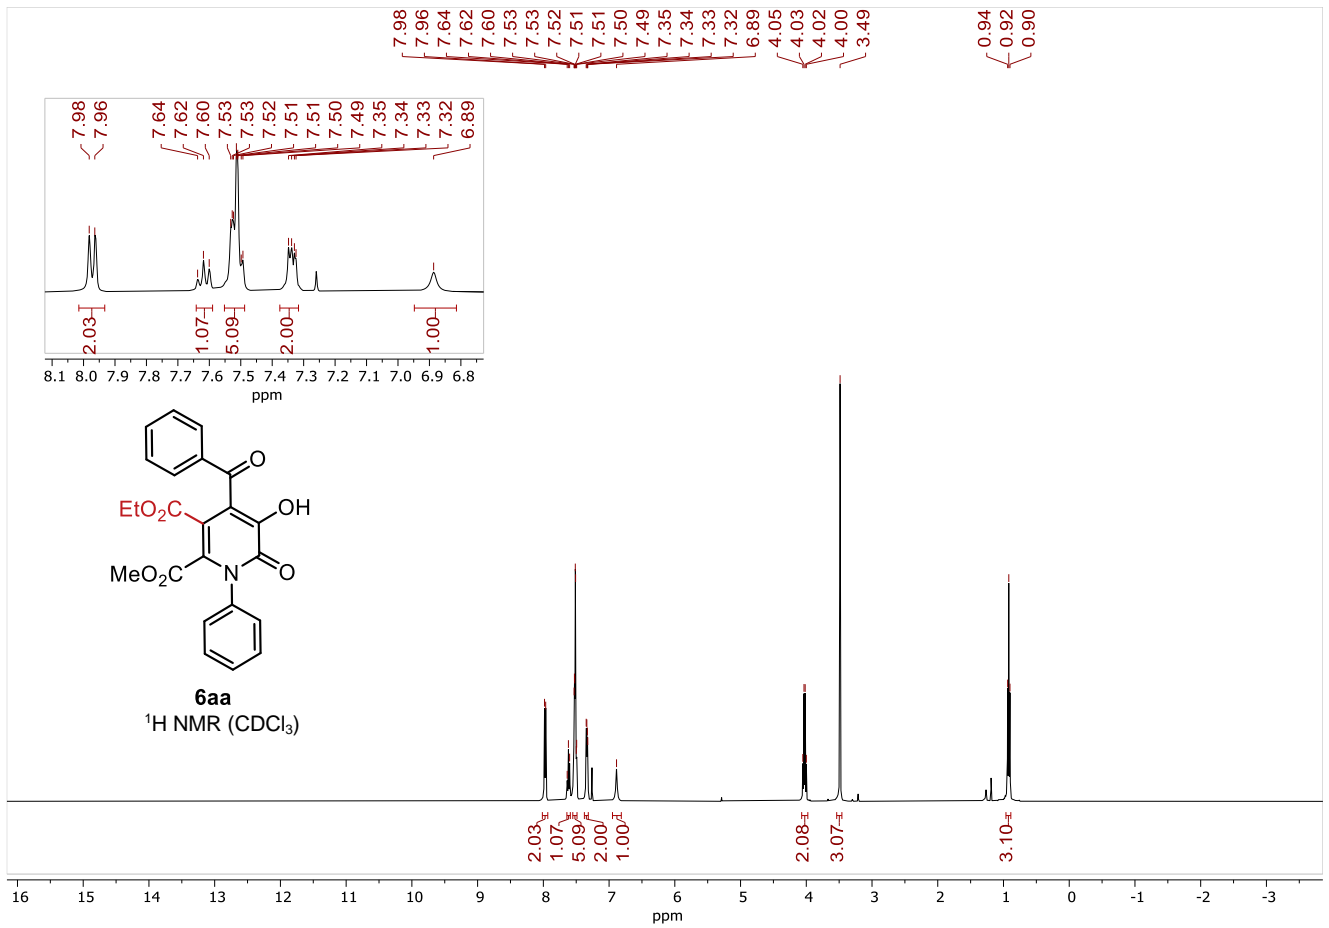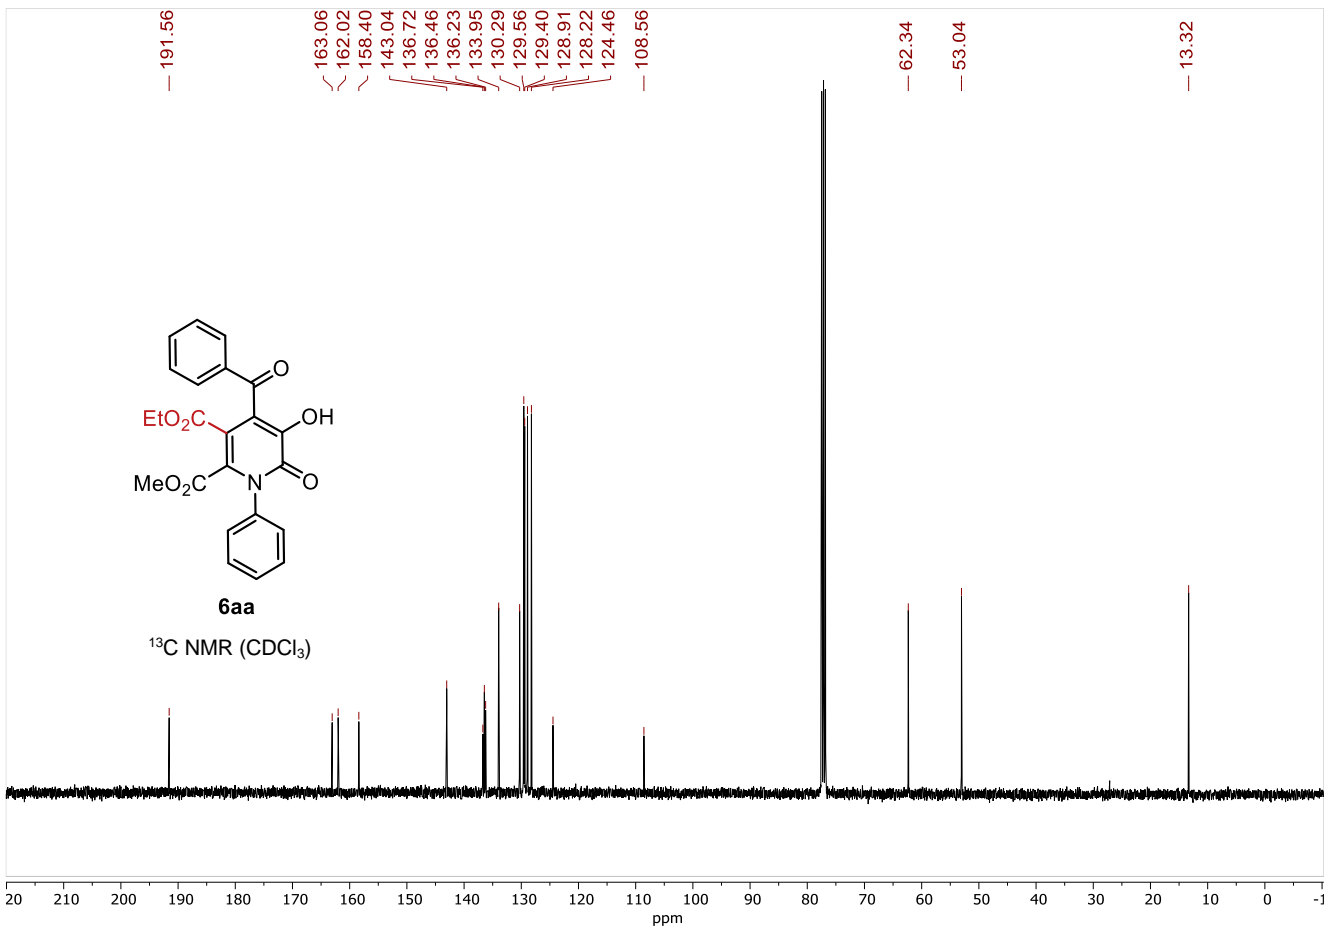

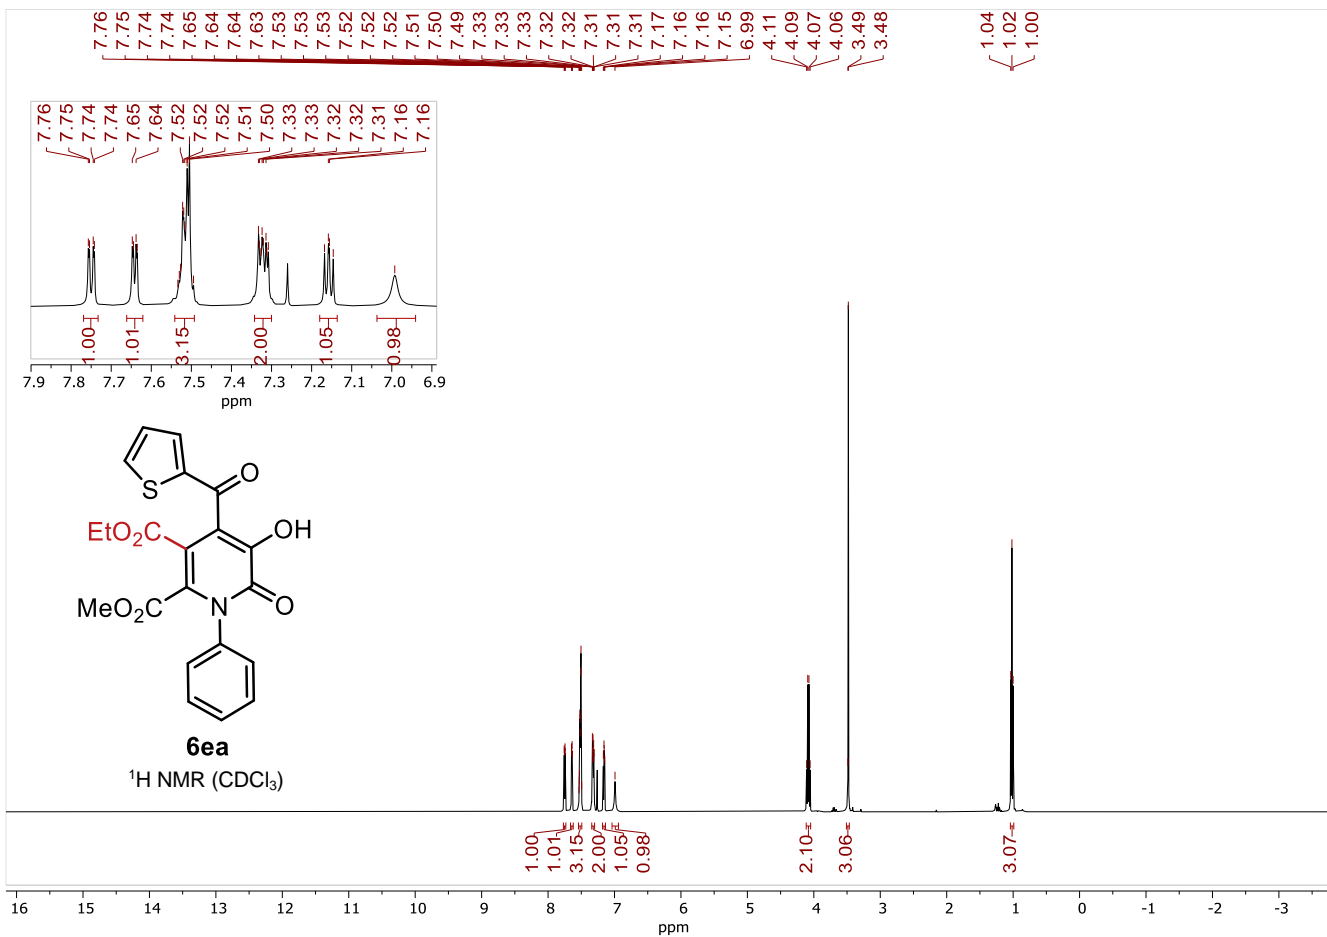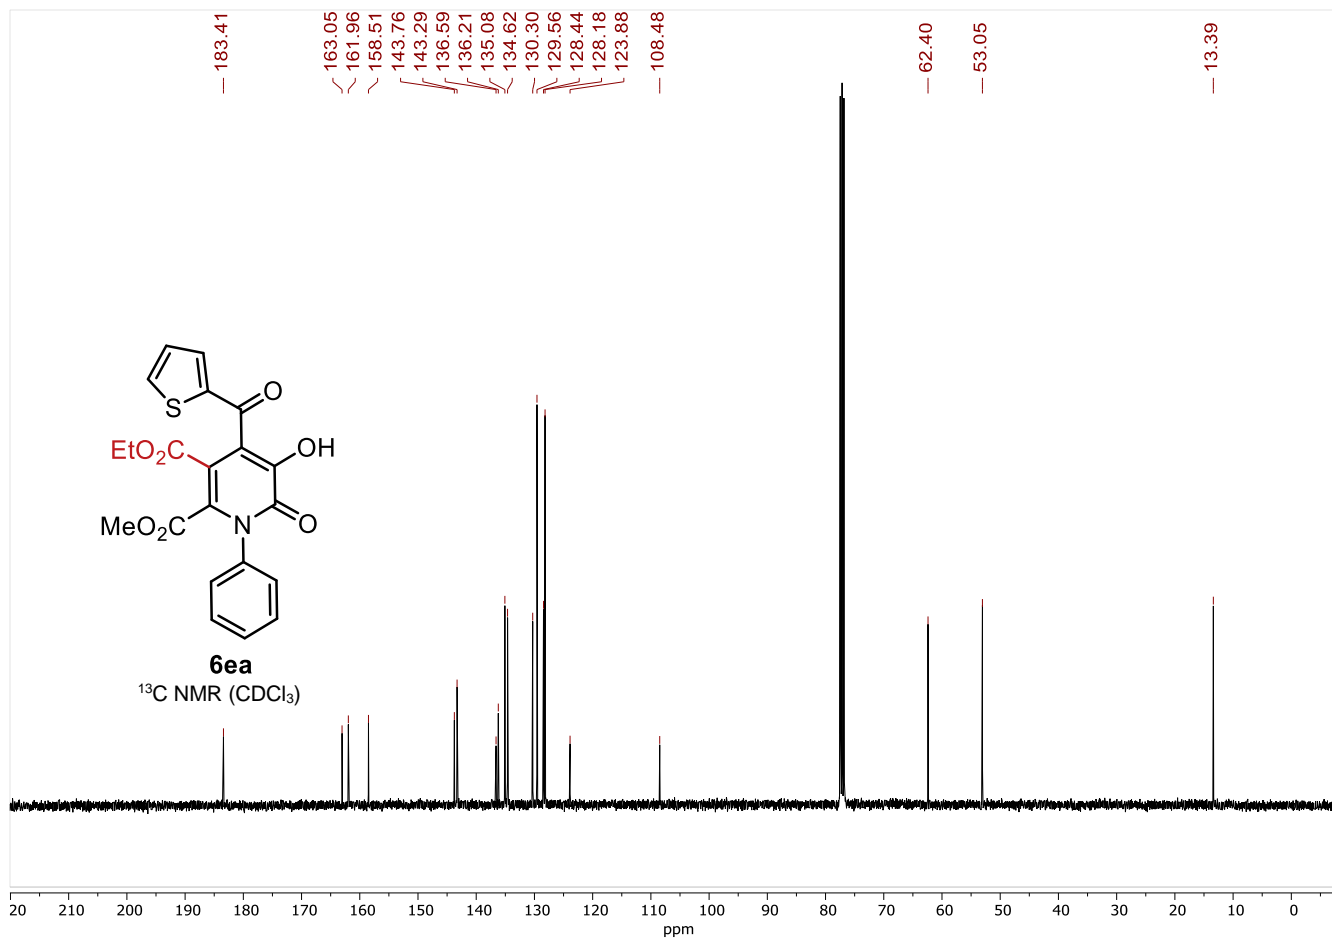

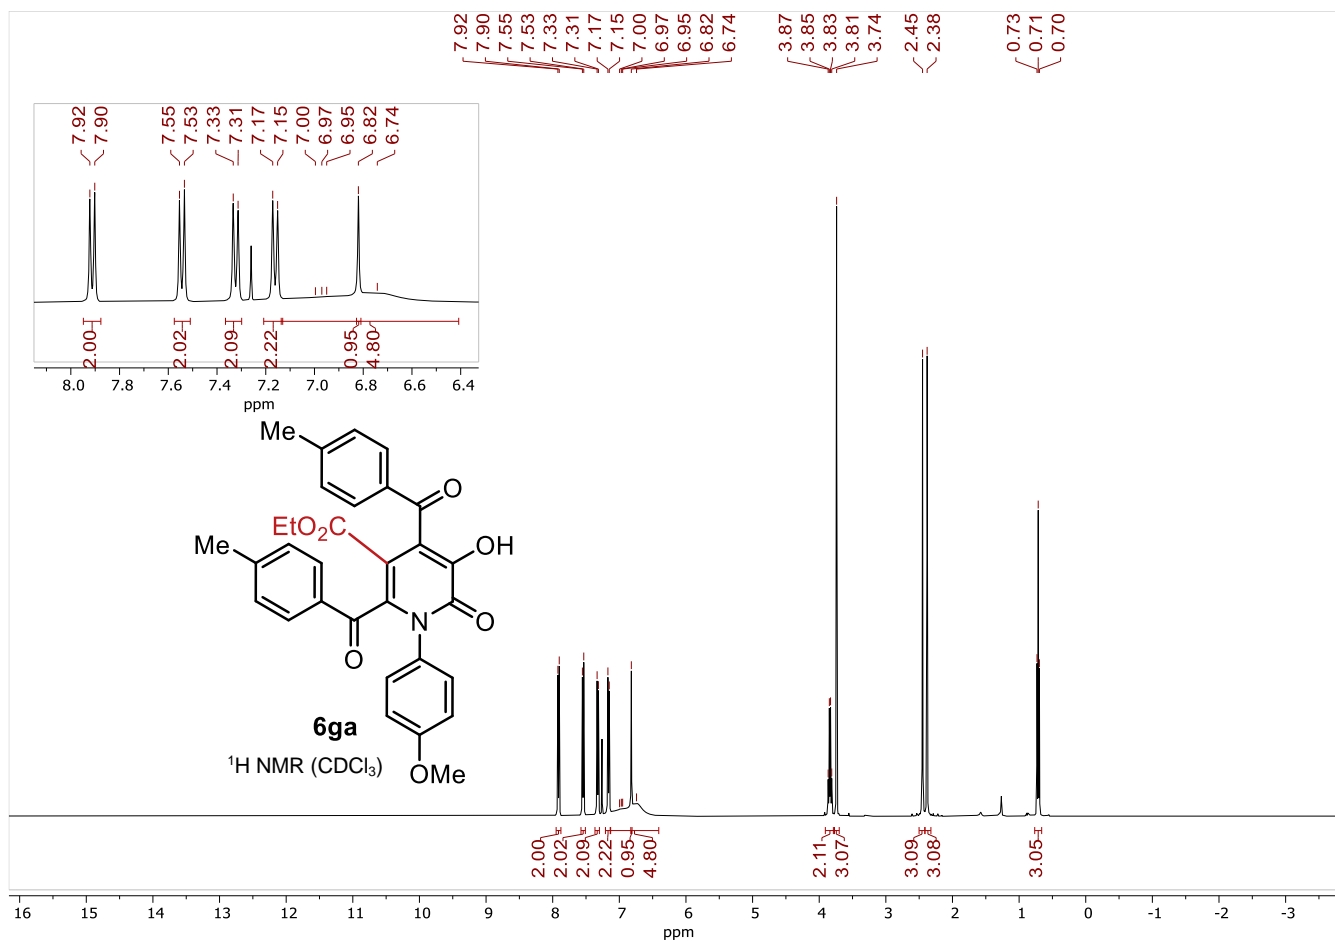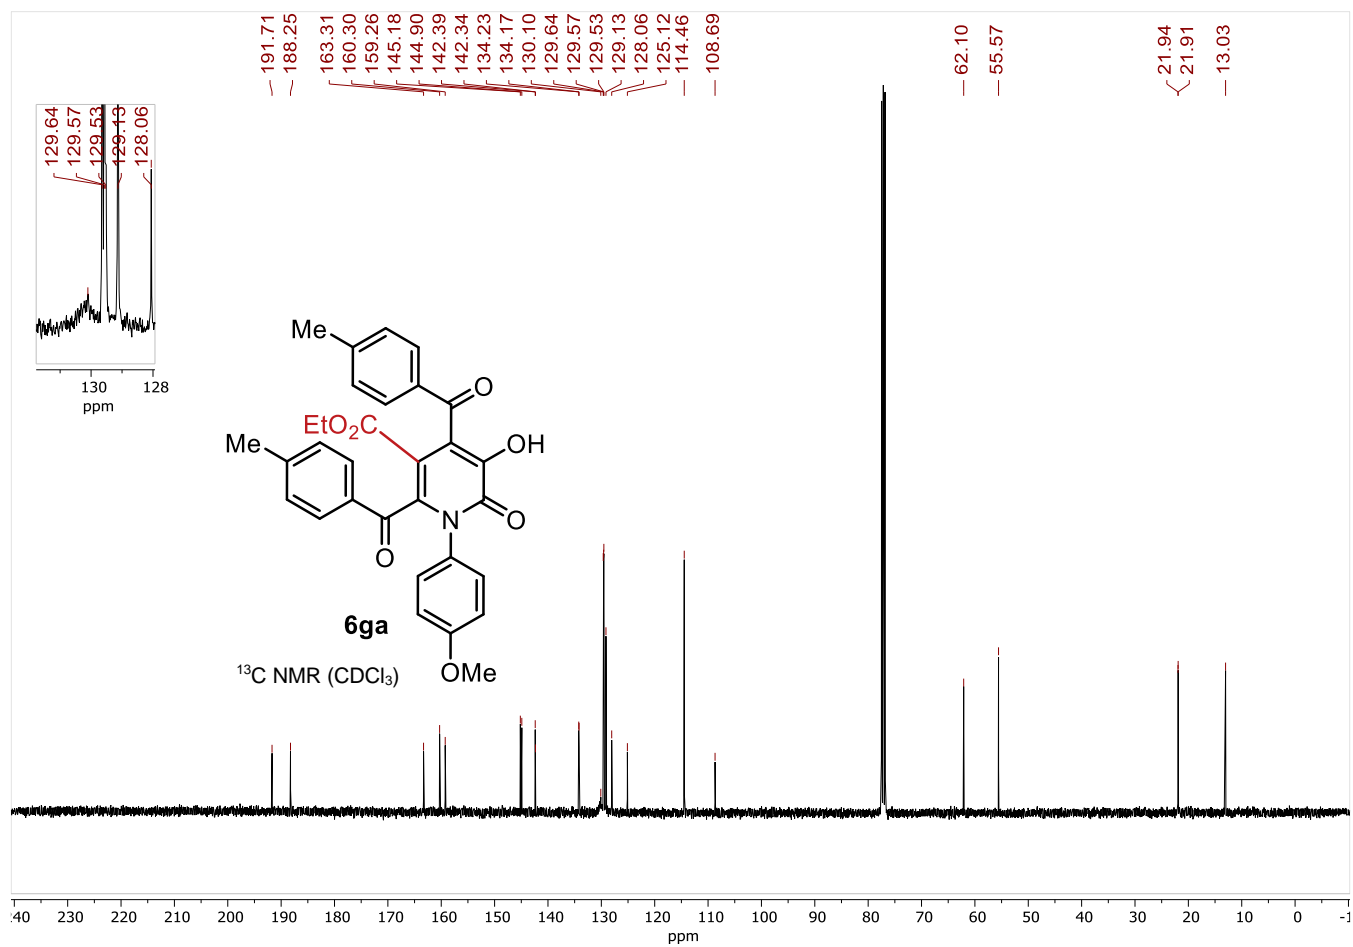

Supplement: d4qo02337d1.pdf [file d4qo02337d1.pdf]
